# Supplementary material for: Coronary heart disease, hypertension and use of biomass fuel among women: comparative cross-sectional study
Source: PubMed Central journal article supplement — BMJ Open. 2019 Aug 8;9(8):e030881. doi: 10.1136/bmjopen-2019-030881 (PMC6701594; doi:10.1136/bmjopen-2019-030881), 2019-08-08
Supplement: bmjopen-2019-030881.draft_revisions.pdf [file bmjopen-2019-030881.draft_revisions.pdf]

# BMJ Open

BMJ Open is committed to open peer review. As part of this commitment we make the peer review history of every article we publish publicly available.

When an article is published we post the peer reviewers' comments and the authors' responses online. We also post the versions of the paper that were used during peer review. These are the versions that the peer review comments apply to.

The versions of the paper that follow are the versions that were submitted during the peer review process. They are not the versions of record or the final published versions. They should not be cited or distributed as the published version of this manuscript.

BMJ Open is an open access journal and the full, final, typeset and author-corrected version of record of the manuscript is available on our site with no access controls, subscription charges or pay-per-view fees (<http://bmjopen.bmj.com>).

If you have any questions on BMJ Open's open peer review process please email [editorial.bmjopen@bmj.com](mailto:editorial.bmjopen@bmj.com)

# BMJ Open

## Coronary Heart Disease, Hypertension and Use of Biomass Fuel among Women: Comparative Cross-sectional Study.

|                               |                                                                                                                                                                                                                                                                                  |
|-------------------------------|----------------------------------------------------------------------------------------------------------------------------------------------------------------------------------------------------------------------------------------------------------------------------------|
| Journal:                      | <i>BMJ Open</i>                                                                                                                                                                                                                                                                  |
| Manuscript ID                 | bmjopen-2019-030881                                                                                                                                                                                                                                                              |
| Article Type:                 | Research                                                                                                                                                                                                                                                                         |
| Date Submitted by the Author: | 04-Apr-2019                                                                                                                                                                                                                                                                      |
| Complete List of Authors:     | Fatmi, Zafar; Aga Khan University, Department of Community Health Sciences<br>Ntani, G; University of Southampton and Southampton University Hospitals NHS Trust, MRC Lifecourse Epidemiology Unit<br>Coggon, David; University of Southampton, MRC Lifecourse Epidemiology Unit |
| Keywords:                     | Coronary heart disease < CARDIOLOGY, biomass fuel, Hypertension < CARDIOLOGY, women                                                                                                                                                                                              |
|                               |                                                                                                                                                                                                                                                                                  |

SCHOLARONE™  
Manuscripts

# Coronary Heart Disease, Hypertension and Use of Biomass Fuel among Women: Comparative Cross-sectional Study.

Zafar Fatmi,<sup>1,2</sup> Georgia Ntani,<sup>2</sup> David Coggon<sup>2</sup>

<sup>1</sup>Department of Community Health Sciences, Aga Khan University, PO Box 3500, Karachi 74800, Pakistan.

<sup>2</sup>MRC Lifecourse Epidemiology Unit, University of Southampton, Southampton, UK.

\*Correspondence should be addressed to Zafar Fatmi; [zafar.fatmi@aku.edu](mailto:zafar.fatmi@aku.edu) ;

## Abstract

**Objectives:** To explore the associations of coronary heart disease (CHD) and hypertension with use of biomass fuel for cooking.

**Design:** Comparative cross-sectional study.

**Setting:** Rural villages in Sindh, Pakistan.

**Participants:** Women aged  $\geq 40$  years who had used biomass fuel for cooking for at least the past year (n = 436), and a comparison group (n=414) who had cooked only with non-biomass fuel over the same period were recruited through door-to-door visits. None of those who were invited to take part declined.

**Primary and secondary outcome measures:** CHD was assessed by three measures: history of angina (Rose angina questionnaire), previous history of 'heart attack', and definite or probable changes of CHD on electrocardiogram (ECG). Hypertension was determined from blood pressure measurements and use of medication. Potentially confounding risk factors were ascertained by questionnaire and anthropometry. Associations of CHD and hypertension with use of biomass and other risk factors were assessed by logistic regression, and summarised by odds ratios (ORs) with 95% confidence intervals (CIs).

**Results:** After adjustment for potential confounders, there was no association of angina (OR: 1.0, 95% CI 0.8-1.4), heart attack (OR: 1.2, 95% CI 0.7 – 2.2), ECG changes of CHD (OR: 0.8, 95% CI 0.6 – 1.2) or hypertension (OR: 1.0, 95% CI 0.8 – 1.4) with current use of biomass for cooking. Nor were any associations apparent when analyses were restricted to long-term ( $\geq 10$  years) users and non-users of biomass fuel.

**Conclusions:** A linked air monitoring study indicated substantially higher airborne concentrations of fine particulate matter in kitchens where biomass was used for cooking. It is possible that associations with CHD and hypertension were missed because most of the comparison group had used biomass for cooking at some time in the past, and risk remains elevated for many years after last exposure.

## Strengths and limitations of this study:

- The study was well-powered with a high response rate from those invited to take part, and large contrasts in recent exposure to indoor air pollution.

- Comparisons were based on recent cooking practices, but some exposures may have changed since the onset of CHD.
- Many women who did not currently use biomass for cooking, had done so in the past, and this may have obscured associations with health outcomes if effects of exposure persist long-term.
- Errors may have occurred in the assessment of outcome measures, biasing risk estimates towards the null.
- Recall of some potentially confounding factors may have been inaccurate, leading to uncontrolled residual confounding.

### **Funding Statement**

This research was supported by a fellowship from the Colt Foundation for the conduct of a PhD by Professor Zafar Fatmi. Professor David Coggon and Dr Georgia Ntani were supported by funding from the UK Medical Research Council (MRC\_MC\_UU\_12011/5).

### **Conflicts of Interest**

The authors declare that there is no conflict of interest regarding the publication of this paper.

### **Authors' contributions**

ZF led the design and conduct of the study, carried out the initial statistical analyses, and wrote the first draft of the manuscript.

GN oversaw and guided the statistical analysis.

DC supervised the project and amended the first draft of the manuscript.

All authors approved the final version of the manuscript.

## Introduction

Much of the world's population still uses biomass fuel (wood, cow-dung, crop residues etc.) in open fires or simple stoves for domestic cooking and heating [1,2]. The household air pollution (HAP) which this generates is a major cause of respiratory infections among children [3-5], chronic obstructive pulmonary disease [6-7] and lung cancer [8-10]. In addition, several studies have suggested a hazard of coronary heart disease (CHD), but evidence for this is more limited [11].

We, therefore, carried out a cross-sectional survey to explore the association between CHD and cooking with biomass in a sample of women drawn from the general population in rural areas of Pakistan. The objective of the study was to compare the prevalence of angina, previous history of heart attack, electrocardiographic (ECG) changes indicative of CHD, and hypertension in women  $\geq 40$  years of age who used biomass fuel for cooking with that in women of similar age who cooked using other types of fuel.

## Materials and Methods

### *Study Setting*

The survey was conducted during January to September 2015 in villages surrounding the main urban area of Nawabshah district (recently renamed as Shaheed Benazirabad) in the province of Sindh, Pakistan. These were selected to give a mix in the fuels used for cooking within the study sample. Some of the villages had been supplied with natural gas for at least 10 years, whereas in others biomass fuel (wood and/or cow dung) was still being used.

### *Recruitment of households and subjects*

Within each village, trained field workers made door-to-door visits, and asked the heads of households whether their families would be willing to assist with the study, and if so, what type of fuel was used for cooking, and whether food preparation was regularly undertaken by a woman  $\geq 40$  years of age. In this way, the study team identified quotas of the required numbers of households in each of the two categories of fuel use (biomass and other). The heads of these households were then asked to complete a consent form, and to identify and introduce the woman of the household aged  $\geq 40$  years who had carried out the most cooking in the house over the past 10 years. The study was explained to her, and she was invited to participate and to give signed consent.

### *Inclusion criteria*

Women aged 40 years or older were eligible for inclusion if they gave informed consent, and had been cooking in the household for at least the past year, using only one of biomass fuel or non-biomass fuel (natural gas).

### *Questionnaire, examination and measurements*

A standardized questionnaire was used to collect information at interview about: demographic and socio-economic characteristics, birth weight, smoking history, whether another member of the household was a regular smoker, relevant aspects of diet, physical activity, lifetime history of cooking using different types of fuel, any previous diagnosis of a "heart attack" by a doctor, symptoms of angina (through the Rose angina questionnaire [12]), and any current use of medication for hypertension. In addition, measurements were made of height, weight, waist circumference, hip circumference and blood pressure.

1  
2  
3 Socioeconomic status was characterized by the literacy of the participant (no vs. any literacy), the  
4 type of employment of her father during her childhood (manual or non-manual), the ownership and  
5 construction of her house ('pucca' i.e. made of concrete walls and roof or 'katcha/semi-pucca' i.e.  
6 made fully or partially of thatched walls and roof), the income level of the household, and the number  
7 of household assets owned from a list of seven. Birth weight was determined from participants' recall  
8 as being 'higher than normal vs. normal vs. lower than normal'.  
9

10 The questions on smoking covered use of cigarettes, *bidi* (locally made cigarettes without filters) or a  
11 huqqa (pipe) regularly (at least once a week for a month or longer). The number of other people in  
12 the household who smoked provided a measure of domestic exposure to environmental tobacco  
13 smoke (ETS), which was classified according to whether at least one other household member  
14 smoked cigarettes, *bidi*, or a huqqa in the home.  
15  
16

17 Dietary questions covered the use of oil or ghee for cooking and eating, and weekly consumption of  
18 meat and eggs. The former was categorized to three levels: only or mostly use oil; mixed use of oil  
19 and ghee; only or mostly use ghee. Frequencies of consuming meat and eggs were each categorized  
20 to two levels: at least once per week vs. less than once per week.  
21

22 Level of physical activity was assessed through questions on the frequency per week of shopping,  
23 fetching water, washing clothes, collecting wood for cooking, agricultural work on a farm and any  
24 other regular heavy physical work. Each of these activities was categorized to two levels: zero days  
25 per week or at least once per week. A composite physical activity score was then derived as the  
26 number of activities carried out at least once per week, with values ranging from 0 to 6.  
27  
28

29 Height, weight, and waist and hip circumference were measured using a stadiometer, digital weighing  
30 scale and measuring tape, following standardized methods. Body mass index (BMI) (weight in  
31 kilograms per squared height in meters) and waist-to-hip ratio (WHR) were then calculated from the  
32 measurements. BMIs  $\geq 25\text{kg/m}^2$  were considered abnormally high (overweight or obese), as were  
33 WHRs  $\geq 0.85$ .  
34

#### 35 *Categories of exposure to biomass:*

36 Use of biomass was classed to two main categories; biomass users who currently used firewood  
37 and/or cow dung for cooking; and non-users of biomass who did not (other sorts of biomass for  
38 example coal were not used for cooking in the community studied).  
39  
40

41 In addition, two subsets of these main categories were distinguished: long-term biomass users who  
42 currently used firewood and/or cow dung for cooking and had done so for at least the past 10 years;  
43 and long-term non-users of biomass who currently did not use either firewood or cow dung for  
44 cooking and had not done so for at least 10 years.  
45  
46

#### 47 *Outcome measures:*

48 Four outcome measures were specified.  
49

50 Hypertension: Three measurements of blood pressure were made at five-minute intervals, using an  
51 Omron upper arm blood pressure monitor, and mean values for systolic and diastolic blood pressure  
52 were derived. Women were deemed to have hypertension if they met at least one of three criteria:  
53 mean systolic blood pressure  $\geq 140$  mm Hg; mean diastolic blood pressure  $\geq 90$  mm Hg; regular use of  
54 medication for blood pressure.  
55  
56

57 Angina: Experience of angina was assessed through the WHO's Rose angina questionnaire [12],  
58 which comprises seven questions relating to chest pain, its anatomical distribution, precipitating and  
59 relieving factors, and duration. A diagnosis of angina required report of pain, pressure or discomfort  
60

1  
2  
3 in the chest centrally, or in both the left anterior chest and left arm, that occurred when walking uphill  
4 or hurrying, that caused the participant to stop or slow down when it occurred while walking, and that  
5 was then relieved within 10 minutes by standing still.  
6

7 Heart attack: Previous diagnosis of “heart attack” by a doctor was ascertained through a single  
8 question: “In the past, have you ever been told by a health care provider that you had a ‘heart  
9 attack’?”  
10

11  
12 Definite or probable CHD on ECG: A 12-lead ECG was recorded according to a standard protocol,  
13 and coded for the presence of definite or probable CHD, using the Minnesota Code Manual of  
14 Electrocardiographic Findings, second edition [13]. This corresponded to the presence of any of  
15 codes 1-1 to 1-3, 3-1, 4-1 to 4-4, 5-1 to 5-3, 7-1-1 and 9-2. In order to check the repeatability of the  
16 coding, two of us (ZF and DC) coded all of the ECGs independently. We used the same scanned ECG  
17 traces, without information about the type of cooking fuel used by the participant. Levels of  
18 agreement between the observers were assessed, using kappa statistics. Where differences occurred in  
19 the classification of an ECG trace, they were then resolved by discussion between the two observers.  
20

### 21 *Statistical analysis*

22  
23 Data were double-entered in Epidata 3.1 software [14] for validation. All discrepancies were  
24 corrected by reference to the original questionnaire or record sheet. Statistical analysis was carried out  
25 with Stata version 12.0 [15].  
26

27  
28 As a first step, several variables were reclassified or combined, based on their distribution in the full  
29 study sample, and without knowledge of participants’ use of biomass fuel. Thus, a combined index  
30 was derived for frequency of consuming meat and eggs with three levels: neither meat nor eggs as  
31 much as once per week; one of meat or eggs at least once per week; both meat and eggs at least once  
32 per week. Scores for physical activity were categorized into three levels: low (0-1 activities); medium  
33 (2-3); high (4 or more). Similarly, BMI and WHR were combined as a single variable with three  
34 categories: neither BMI nor WHR high; one of BMI or WHR high; both BMI and WHR high.  
35

36  
37 Descriptive statistics were produced for women in each of the four categories of exposure to biomass,  
38 summarizing their demographic and socioeconomic characteristics, current and past cooking  
39 arrangements, types and durations of fuel use, hours of cooking per day, types of stove and kitchen,  
40 and exposures to potentially confounding risk factors. The prevalence of the main outcomes was  
41 determined for the study sample overall, and the relationship of ECG changes to angina and history of  
42 heart attack was explored.  
43

44  
45 Logistic regression analysis was then used to assess the association of each of the four outcome  
46 variables with use of biomass fuel for cooking and other possible risk factors. First, associations with  
47 each potential risk factor were determined after adjustment for age. The main exposure of interest  
48 (user or non-user of biomass) was then carried forward into a mutually adjusted model along with all  
49 other risk factors which showed associations ( $p \leq 0.1$ ) when examined individually. In addition, a  
50 second mutually adjusted model was fitted that compared long-term use and non-use of biomass for  
51 cooking.  
52

### 53 *Sample size*

54  
55 The size of the study sample was determined by a power calculation which assumed an outcome  
56 prevalence of at least 6% for definite CHD among non-users of biomass fuel, based on a previous  
57 study in Pakistan [16] (the prevalence of other outcomes was expected to be higher). This indicated  
58 that we would require at least 876 women (438 users and 438 non-users of biomass) for 80% power to  
59 detect an odds ratio of 2.0 for the use of biomass fuel with a 5% level of statistical significance.  
60



### *Ethical approval*

The study was approved by Ethics Review Committee of Aga Khan University, Karachi, Pakistan.

### **Results**

A total of 24 villages were visited in order to recruit the number of households required for the survey. In 14 villages all households used biomass for cooking, in three, all used natural gas, and in the other seven, both types of fuel were used. The number of participating households per village ranged from as few as three to as many as 210. Interviews were completed with women from a total of 1073 households, 536 of which currently used biomass fuel, and 537 natural gas. No-one declined to participate in the study, but 77 women could not be interviewed because they were not at home at the time when the survey team visited (mostly because they were engaged in agricultural work).

Among the 1073 women who completed interviews, 44 indicated that they were in fact aged less than 40 years of age, and were therefore excluded from the analysis. An additional 151 women had not made meals regularly (at least one meal per day on most days of the week) during the past year, and were also excluded. We further excluded 28 women who did not currently use firewood or cow dung for cooking, but whose time since last use of biomass was <2 years (this was done to ensure distinct exposure categories). Thus, further analysis was based on 850 women: 436 users and 414 non-users of biomass. Among them, 430 were long-term biomass users, and 263 were long-term non-users.

Table 1 summarizes the demographic and socioeconomic characteristics of the participants in the study sample overall, and according to categories of exposure to biomass fuel. In comparison with users of biomass, non-users were marginally younger (63% versus 60% <50 years), and somewhat more advantaged socioeconomically.

Table 2 describes the current and past cooking arrangements of participants, including type and duration of fuel use, intensity of cooking, and type of stove and kitchen. Even among the long-term non-users of biomass, 88% had cooked with biomass fuels at some time in their life. Among the biomass users, the large majority had used wood (93%) and cow dung (88%) for longer than 20 years. Few participants (3.7% of biomass users and 6.3% of non-users) had ever used kerosene as a cooking fuel. Most participants (approximately 60%) currently cooked for 2-3 hours per day, the average duration of cooking per day being similar in users and non-users of biomass. Where biomass was used for cooking, it was also more likely to be used to heat the home.

Table 3 shows the distribution of potentially confounding risk factors for CHD in the four categories of exposure to biomass. In comparison with non-users of biomass, slightly higher proportions of women using biomass reported having been born with 'lower than normal' birth weight, having lost weight at some time during childhood, ever having smoked, and being exposed to environmental tobacco smoke in the home.

### *Prevalence of outcome measures*

Supplementary Table 1 shows the prevalence of the main outcome measures that were investigated. In total, 297 women (35%) were classed as having hypertension, two thirds of whom were taking regular medication for blood pressure. About 27% had symptoms indicative of angina based on Rose's questionnaire. Fifty-four (6.4%) reported a previous history of heart attack, and 19% of women had findings of definite or probable CHD on ECG.

### *Validity of ECG classification and interrelationships of outcome measures:*

Supplementary Table 2 compares the classification of ECGs by the two observers. Satisfactory ECG traces were obtained for 841 (98.9%) of the participants, but four were missing from the file used to assess inter-observer agreement, and were later assessed jointly by the two observers. The overall agreement between the two observers was 85.2% (kappa = 0.57). Most disagreements were related to



1  
2  
3 cases in which the exceedance of a threshold in, for example, ST elevation, ST depression or the  
4 width (duration) of a Q wave was borderline. In some cases, it was questionable whether there was a  
5 small R wave or a QS pattern. Also, there was some disagreement about whether T waves were  
6 negative or flat. Following discussion between the two observers, all of the discrepancies were  
7 reconciled, and it was finally agreed that 181 women (21.5%) showed changes indicative of definite  
8 or probable CHD. However, in 22 of these cases, it appeared that the abnormality had occurred only  
9 because the ECG leads had been placed incorrectly, and those traces were reclassified as normal.  
10 Thus in further analyses, 159 (19%) of women were considered to have definite or probable CHD on  
11 ECG.  
12

13  
14 Supplementary Table 3 shows the prevalence of definite or probable CHD on ECG according to  
15 symptoms of angina and history of heart attack. It was somewhat more frequent in participants who  
16 reported an earlier heart attack (26%) than in those who did not and had no symptoms of angina  
17 (18%). However, there was no association with angina in the absence of heart attack.  
18

#### 19 *Association of outcome measures with use of biomass and other risk factors*

20 Associations of hypertension and the three CHD outcomes (angina, heart attack and definite or  
21 probable CHD on ECG) with potential risk factors are presented in Supplementary Tables 4 to 7, from  
22 which the risk estimates for use of biomass fuel for cooking are summarized in Table 4. The first  
23 column of each table gives odds ratios adjusted only for age, while the second column presents  
24 mutually adjusted risk estimates from a single model that included use of biomass and all of the risk  
25 factors that showed associations ( $p \leq 0.1$ ) in the analyses adjusted only for age. The last column shows  
26 findings from a similar analysis but restricted to women who were long-term users or non-users of  
27 biomass.  
28

29  
30 In analyses that adjusted only for age, hypertension was associated ( $p \leq 0.1$ ) with older age, a higher  
31 number of household assets, higher frequency of consuming meat and eggs, and having a high BMI or  
32 WHR (Supplementary Table 4). When these variables were carried forward to the mutually adjusted  
33 analysis, the association with consumption of meat and eggs was diminished, but the others remained.  
34 Thus, the risk of hypertension increased 40% with every 10-year increase in age, was 2.3 times higher  
35 in women with  $\geq 4$  household assets than in those with 0 or 1, and was increased 1.9-fold in women  
36 who had both high BMI and high WHR as compared with those in whom neither BMI nor WHR were  
37 elevated. However, hypertension was not associated with use of biomass (OR 1.0 in the fully adjusted  
38 model). When analysis was restricted to long-term users and non-users of biomass, results were  
39 similar, with an OR of 1.1 for long-term use of biomass.  
40

41  
42 In analyses that adjusted only for age, the odds of angina increased with age and regular smoking, and  
43 were significantly lower with more frequent consumption of meat and eggs (Supplementary Table 5).  
44 Moreover, this pattern was maintained when risk estimates were mutually adjusted. Thus, the odds of  
45 angina increased by 30% per 10-year increase in age, and with ever having smoked regularly (OR 2.0,  
46 95%CI 1.2-3.2), and were significantly lower in women who ate both meat and eggs at least once per  
47 week (OR 0.5, 95%CI 0.3-0.7). There was, however, no association with use of biomass (OR 1.0,  
48 95%CI 0.8-1.4). When analysis was restricted to long-term users and non-users of biomass, results  
49 were similar except that there was a suggestion of a weak association with exposure to biomass (OR  
50 1.3, 95%CI 0.9-1.9).  
51

52  
53 In corresponding analyses with previous history of heart attack (diagnosed by a physician) as an  
54 outcome, initial models with adjustment only for age indicated associations ( $p < 0.1$ ) with age, higher  
55 household income, higher number of household assets, and high BMI or WHR (Supplementary Table  
56 6). After mutual adjustment, age remained a significant risk factor (OR 1.5, 95%CI 1.2-2.0, for each  
57 10-year increase in age). However, the other associations, although still positive, were not significant  
58 at a 5% level. Nor was there an association with use of biomass for cooking (OR 1.2, 95%CI 0.7-2.2).  
59 In the mutually adjusted model for long-term use of biomass, results were very similar.  
60

1  
2  
3 In analyses adjusted only for age, household income was the only variable significantly associated  
4 with definite or probable CHD on ECG, and it remained significant in the fully adjusted model (OR  
5 1.6, 95%CI 1.1-2.4 for household income >10,000PKR) (Supplementary Table 7). However, there  
6 was no association with use of biomass for cooking, either overall or in the long-term (ORs 0.8 and  
7 0.9).  
8  
9

## 10 Discussion

11  
12 This study found no association between use of biomass fuel and any of the four outcomes studied  
13 (angina, previous history of heart attack, definite or probable CHD on ECG and hypertension), even  
14 when comparison was with women who had not used biomass for at least the last 10 years. The  
15 strongest hint of an association was for angina in long-term users as compared with long-term non-  
16 users of biomass, but the elevation of risk was small (30%) and not statistically significant at a 5%  
17 level.  
18  
19

20 The choice of villages from which to recruit participants ensured a balance in the fuels currently used  
21 for cooking, and cooperation in the survey was good with high response rates from the households  
22 and women that were invited to take part. Inevitably, recruitment was to some extent opportunistic  
23 and limited to one province of Pakistan. However, there seems no reason to expect that the study  
24 sample would have been seriously unrepresentative in the associations of hypertension and CHD with  
25 use of biomass and other risk factors.  
26  
27

28 A linked air monitoring study found that in the kitchens of houses using biomass for cooking, the  
29 mean 24-hour average PM<sub>2.5</sub> concentrations was 531 µg/m<sup>3</sup>, with a median of 136 µg/m<sup>3</sup> and inter-  
30 quartile range 34-615 µg/m<sup>3</sup> (paper in preparation). Corresponding concentrations in houses not using  
31 biomass for cooking were 69.9, 24.2, and 13.5-53.3 µg/m<sup>3</sup>. Thus, while individual exposures may  
32 have been influenced also by time spent cooking and whether biomass was burned in a closed or open  
33 kitchen, the absence of associations with CHD and hypertension is unlikely to reflect inadequate  
34 contrasts in recent intensity of exposure.  
35

36 Our aim was as far as possible to recruit households that had used the same fuel for cooking  
37 exclusively for at least 10 years. Villages were selected with this criterion in mind, and it was covered  
38 in preliminary inquiries that were addressed to local community representatives. In practice, however,  
39 it turned out that where natural gas was available in villages, some participants had not yet switched  
40 to cleaner fuel, or had done so at a later date than others. A pragmatic decision was therefore made to  
41 include women even if they had changed their cooking fuel within the past 10 years, provided that  
42 they had used their current fuel for at least a year. This seemed reasonable since trials had suggested  
43 that interventions to reduce household air pollution from use of biomass for cooking can produce  
44 reductions in blood pressure and changes in ECGs over the short to medium term [17-19]. However,  
45 to check that it did not obscure associations, additional analyses were carried out with restriction to  
46 long-term users and non-users of biomass, and still no relationship was found with the health  
47 outcomes.  
48  
49

50 The sample size achieved for the study was close to that planned, and the prevalence of the four  
51 outcomes was higher than had been assumed in the power calculations. Moreover, the upper  
52 confidence limits for the odds ratios relating to use of biomass were almost all <2. Thus, the absence  
53 of associations with biomass does not reflect a lack of statistical power.  
54

55 Ascertainment of current use of biomass is likely to have been highly accurate, and while there may  
56 have been some errors in recall of the times when biomass had been used in the past, it is difficult to  
57 conceive that any resultant misclassification would have obscured important associations with CHD.  
58 Generally, switches in the use of fuel were only in one direction – towards cleaner natural gas from  
59 biomass. The timing of changes was usually well recalled because in most instances the entire village  
60

1  
2  
3 received the new source of fuel in a particular year. However, the duration of using cow dung and  
4 firewood may not always have been remembered reliably, and switches between these types of fuel  
5 could also have occurred. Many women reported using cow dung and firewood for the same duration,  
6 and no attempt was made to analyse them separately.  
7

8 Recall of some potentially confounding exposures may also have been inaccurate – particularly those  
9 pertaining to childhood. If so, the errors would be expected to be non-differential with respect to  
10 CHD, and therefore to bias risk estimates towards the null, possibly leading to uncontrolled residual  
11 confounding. However, the assessment of BMI and WHR used standardized methods, and should  
12 have been reasonably reliable. The interviewers were trained in how to make the measurements, and  
13 their technique was piloted in the field before the start of data collection.  
14

15  
16 A greater concern is the possibility of error in the ascertainment of outcomes. Blood pressure was  
17 objectively measured according to a standardized protocol, and was taken as the average of three  
18 readings. Moreover, most of the women who were classed as having hypertension were taking  
19 treatment for the disorder, which supports the validity of its assessment. Angina was determined  
20 through the well-established Rose questionnaire, but it is possible that symptoms in some cases arose  
21 from other pathology. Previous research has suggested that the Rose angina questionnaire may not be  
22 as reliable among women as in men [20]. Although the question to participants about history of heart  
23 attack referred specifically to diagnoses that had been given by a health professional, errors could  
24 have occurred in interpretation of the term “heart attack” (e.g. to include symptoms from  
25 dysrhythmias and acute heart failure as well as myocardial infarction). However, ascertainment of  
26 heart attack had been previously carried out by the same method in a similar population, where it was  
27 found to be reasonably accurate [21].  
28

29  
30 The diagnosis of CHD from ECGs showed only a weak relationship to history of medically diagnosed  
31 heart attack, and none at all to symptoms of angina (Supplementary Table 3). Between observer  
32 agreement in the classification of ECGs was reasonably good ( $\kappa = 0.57$ ) (Supplementary Table  
33 2), but it is notable that unlike angina and history of heart attack, CHD diagnosed from ECGs did not  
34 show the expected association with age (Supplementary Table 7).  
35

36 To the extent that errors did occur in the ascertainment of outcomes, they are unlikely to have differed  
37 systematically in relation to use of biomass, and therefore would be expected to tend to obscure any  
38 true associations.  
39

40 Because the study had a cross-sectional design, consideration must be given to the possibility of  
41 reverse causation. For risk factors related to childhood (e.g. birthweight, father’s occupation and  
42 education), this is less of a concern. However, it is plausible that characteristics such as diet, physical  
43 activity and time spent cooking could have changed as a consequence of CHD. Depending on the  
44 circumstances, this might bias associations either upwards or downwards.  
45

46 Another limitation of the study was that it did not determine when past heart attacks had occurred.  
47 Even if not as a consequence of an earlier heart attack, some of the exposures studied (e.g. BMI and  
48 WHR) may have changed in the interval since such an attack occurred. If so, this might obscure true  
49 associations.  
50

51 A further possible source of error was uncontrolled residual confounding. To minimize this problem,  
52 information was collected about a range of potentially confounding variables, and as in most studies  
53 of biomass fuel, socio-economic status tended to be higher in women using cleaner fuels [22].  
54 Although several socio-economic indicators were evaluated as possible factors for adjustment,  
55 residual confounding could still have occurred. To explain the absence of associations with biomass,  
56 such confounding would have to be inverse (i.e. the under-ascertained confounder would have to be  
57 less prevalent in women who used biomass than in non-users).  
58  
59  
60

1  
2  
3 The study found expected associations with several established risk factors for CHD. Thus, the odds  
4 of hypertension, angina and previous history of heart attack were all higher with older age (by 30-  
5 50% for every 10 year increase), although this was not found for definite or probable CHD on ECG.  
6 The relationship of CHD to age is well documented in the literature [23], and in women, the incidence  
7 of CHD increases rapidly after the menopause, reaching up to three times that in premenopausal  
8 women [24].  
9

10 Two of the outcome measures – hypertension and previous history of heart attack – were significantly  
11 associated with affluence as measured by number of household assets. This relationship has also been  
12 observed before. In a population-based study in Pakistan, history of ‘angina or heart attack’ was  
13 estimated to have 3-fold higher prevalence among affluent participants than in those who were poor  
14 [25]. The direction of the association, which is the inverse of that observed in western populations,  
15 accords with a higher prevalence of diabetes, hypertension and dyslipidaemias in more educated and  
16 affluent groups, which was found in a recent study conducted in South Asian countries, including  
17 Pakistan [26].  
18

19  
20 In further support of an effect of affluence, we found that high BMI and/or WHR was associated with  
21 greater risk of hypertension, and (non-significantly) with history of heart attack. Obesity has been  
22 shown to increase the risk of hypertension in several studies [27, 28], and partly through this  
23 mechanism, also increases the risk and progression of CHD [29]. The INTERHEART study suggested  
24 that WHR (abdominal obesity) is a better marker of risk for CHD than BMI [30], but the two were  
25 correlated in our study sample, and we opted to use a combined measure.  
26

27 In contrast, we found that more frequent consumption of meat and eggs was associated with reduced  
28 risk of angina. This was unexpected given the known relationship of CHD to consumption of  
29 saturated fat [31], and may have been a chance finding. It did not extend to the other outcomes  
30 investigated. However, a recent large review suggests that the relationship may be inconsistent [32].  
31

32 Smoking has consistently been found to increase the risk of CHD in many studies [33]. However, in  
33 our investigation it was associated only with angina. This might be because intensity of tobacco use  
34 among female smokers in Pakistani population is low [34].  
35

36  
37 Despite the finding of several expected associations, the failure to demonstrate more consistent  
38 relationships to known risk factors is a further indication for caution in the interpretation of our  
39 results.  
40

41 Several earlier studies have indicated links between use of biomass for cooking and CHD, although  
42 the finding has not been entirely consistent [11]. As already discussed, one explanation for our failure  
43 to demonstrate such associations in the current study could be inaccuracies in the diagnosis of CHD.  
44 Another possibility, however, is that adverse effects of exposure to pollutants from the use of biomass  
45 persist many years after last exposure. In this survey, even among women who had not used biomass  
46 during the last 10 years, most had done so earlier, and often for a long time. Only a few participants  
47 (about 3.5% overall) had never used biomass, which was too few for meaningful risk estimates. While  
48 it would be possible to compare rural users of biomass with lifelong users of cleaner fuels in urban  
49 settings, interpretation would be complicated by other important differences between those living in  
50 rural and urban areas.  
51

## 52 **Conclusions**

53 This study evaluated the association of hypertension and three measures of CHD – angina, previous  
54 history of heart attack and definite or probable CHD on ECG - with use of biomass for cooking. We  
55 found no clear associations with any of the health outcomes. However, the weak relationship of ECG  
56 abnormalities to the other two measures of CHD, and the inconsistency of their associations with  
57 well-established risk factors, suggest that this could have been because of diagnostic misclassification.  
58 Alternatively, it could be that an effect was missed because most of the women who were not  
59  
60

1  
2  
3 currently using biomass for cooking had used it in the past, and risk remains elevated for many years  
4 after last exposure.  
5  
6

### 7 **Data Availability**

8  
9 The data [stata.dta format] underpinning the findings of this study are available from the  
10 corresponding author upon reasonable request.  
11  
12  
13  
14

### 15 **Acknowledgments**

16  
17 This study reported in this paper formed part of a PhD project carried out by Dr Zafar Fatmi under the  
18 supervision of Professor David Coggon at the University of Southampton.  
19

20 Mr Syed Nayab Ali Shah coordinated the data collection. Ms Shereen Jamali, Ms Fozia Jamali, Ms  
21 Iqra Memon and Ms Sana Memon administered the questionnaires at interview and recorded the  
22 ECGs. We are grateful also to Professor Keith Palmer and Professor M. Masood Kadir for their  
23 advice on various aspects of the study.  
24  
25  
26  
27  
28  
29  
30  
31  
32  
33  
34  
35  
36  
37  
38  
39  
40  
41  
42  
43  
44  
45  
46  
47  
48  
49  
50  
51  
52  
53  
54  
55  
56  
57  
58  
59  
60



## References

1. Bonjour S, Adair-Rohani H, Wolf J, Bruce NG, Mehta S, Prüss-Ustün A, Lahiff M, Rehfuess EA, Mishra V, Smith KR. Solid fuel use for household cooking: country and regional estimates for 1980-2010. *Environ Health Perspect*. 2013;121:784-90.
2. World Health Organization. Household air pollution and health. Geneva, Switzerland. (Accessed on 4 April 2018). <http://www.who.int/mediacentre/factsheets/fs292/en/>
3. Smith KR, Samet JM, Romieu I, Bruce N. Indoor air pollution in developing countries and acute lower respiratory infections in children. *Thorax*. 2000 Jun;55(6):518-32.
4. Smith KR, Mehta S, Maeusezahl-Feuz M. Indoor air pollution from household use of solid fuels: comparative quantification of health risks. In: Ezzati MLA, Rodgers A, Murray CJL, editors. *Global and regional burden of disease attributable to selected major risk factors*. Geneva, Switzerland: World Health Organization; 2004. pp. 1435–1493.
5. Torres-Duque C, Maldonado D, Pérez-Padilla R, Ezzati M, Viegi G; Forum of International Respiratory Studies (FIRS) Task Force on Health Effects of Biomass Exposure. Biomass fuels and respiratory diseases: a review of the evidence. *Proc Am Thorac Soc*. 2008 Jul 15;5(5):577-90.
6. Liu Y, Lee K, Perez-Padilla R, Hudson NL, Mannino DM. Outdoor and indoor air pollution and COPD-related diseases in high- and low-income countries. *Int J Tuberc Lung Dis*. 2008;12(2):115-27.
7. Kurmi OP, Semple S, Simkhada P, Smith WC, Ayres JG. COPD and chronic bronchitis risk of indoor air pollution from solid fuel: a systematic review and meta-analysis. *Thorax*. 2010; 65(3):221-8.
8. Liu Q, Sasco AJ, Riboli E et al. Indoor air pollution and lung cancer in Guangzhou, People's Republic of China. *Am J Epidemiol*. 1993; 137: 145–54.
9. Kleinerman R, Wang Z, Lubin J, Zhang S, Metayer C, Brenner A. Lung cancer and indoor air pollution in rural china. *Ann Epidemiol*. 2000;10(7):469.
10. Behera D, Balamugesh T. Indoor air pollution as a risk factor for lung cancer in women. *J Assoc Physicians India*. 2005; 53:190-2.
11. Fatmi Z, Coggon D. Coronary heart disease and household air pollution from use of solid fuel: a systematic review. *Br Med Bull*. 2016 Jun;118(1):91-109.
12. Rose G, McCartney P, Reid DD. Self-administration of a questionnaire on chest pain and intermittent claudication. *Br J Prev Soc Med*. 1977; 31:42–48.
13. Prineas RJ, Crow RS, Zhang Z-h. *The Minnesota code manual of electrocardiographic findings*. 2<sup>nd</sup> Edition. London. Springer London; 2010.
14. Christiansen TB and Lauritsen JM. (Ed.) *EpiData - Comprehensive Data Management and Basic Statistical Analysis System*. Odense Denmark, EpiData Association, 2010-. <http://www.epidata.dk>
15. Stata Corp LP 2012, *Stata Statistical Software: Release 12.0*, College Station TX, USA.
16. Jafar TH, Qadri Z, Chaturvedi N. Coronary artery disease epidemic in Pakistan: more electrocardiographic evidence of ischaemia in women than in men. *Heart*. 2008;94(4):408-13.
17. McCracken J, Smith KR, Stone P, Diaz A, Arana B, Schwartz J. Intervention to lower household wood smoke exposure in Guatemala reduces ST-segment depression on electrocardiograms. *Environ Health Perspect* 2011;119:1562-8.
18. McCracken JP, Smith KR, Díaz A, Mittleman MA, Schwartz J. Chimney stove intervention to reduce long-term wood smoke exposure lowers blood pressure among Guatemalan women. *Environ Health Perspect* 2007;115:996-1001.
19. Alexander D, Larson T, Bolton S, Vedal S. Systolic blood pressure changes in indigenous Bolivian women associated with an improved cookstove intervention. *Air Qual Atmos Health* 2015;8:47-53.
20. Wilcosky T, Harris R, Weissfeld L. The prevalence and correlates of Rose questionnaire angina among women and men in the Lipid Research Clinics Program Prevalence Study. *Am J Epidemiol*. 1987;125 (3):400-409.
21. Jafar TH, Jafary FH, Jessani S, Chaturvedi N. Heart disease epidemic in Pakistan: women and men at equal risk. *Am Heart J*. 2005;150(2):221-6.

- 1
  - 2
  - 3
  - 4
  - 5
  - 6
  - 7
  - 8
  - 9
  - 10
  - 11
  - 12
  - 13
  - 14
  - 15
  - 16
  - 17
  - 18
  - 19
  - 20
  - 21
  - 22
  - 23
  - 24
  - 25
  - 26
  - 27
  - 28
  - 29
  - 30
  - 31
  - 32
  - 33
  - 34
  - 35
  - 36
  - 37
  - 38
  - 39
  - 40
  - 41
  - 42
  - 43
  - 44
  - 45
  - 46
  - 47
  - 48
  - 49
  - 50
  - 51
  - 52
  - 53
  - 54
  - 55
  - 56
  - 57
  - 58
  - 59
  - 60
22. Khushk WA, Fatmi Z, White F, Kadir MM. Health and social impacts of improved stoves on rural women: a pilot intervention in Sindh, Pakistan. *Indoor Air*. 2005 Oct;15(5):311-6.
23. Castelli WP. Epidemiology of coronary heart disease: The Framingham study. *American Journal of Medicine* 1984, page 4.
24. Gordon T, Kannel WB, Hjortland MC, McNamara PM. Menopause and coronary heart disease. The Framingham Study. *Ann Intern Med*. 1978; 89:157-61.
25. Hameed K, Kadir M, Gibson T, Sultana S, Fatima Z, Syed A. The frequency of known diabetes, hypertension and ischaemic heart disease in affluent and poor urban populations of Karachi, Pakistan. *Diabet Med*. 1995;12(6):500-3.
26. Ali MK, Bhaskarapillai B, Shivashankar R, Mohan D, Fatmi Z, Pradeepa R, Masood Kadir M, Mohan V, Tandon N, Narayan KM, Prabhakaran D; CARRS investigators. Socioeconomic status and cardiovascular risk in urban South Asia: The CARRS Study. *Eur J Prev Cardiol*. 2016 Mar;23(4):408-19.
27. Hubert HB, Feinleib M, McNamara PM, Castelli WP. Obesity as an independent risk factor for cardiovascular disease: a 26-year follow-up of participants in the Framingham Heart Study. *Circulation* 1983; 67:968-77.
28. Todd Miller M, Lavie CJ, White CJ. Impact of obesity on the pathogenesis and prognosis of coronary heart disease. *J Cardiometab Syndrome* 2008; 3:162-7.
29. Prospective Studies Collaboration. Age-specific relevance of usual blood pressure to vascular mortality: a meta-analysis of individual data for one million adults in 61 prospective studies. *Lancet*. 2002;360: 1903-13.
30. Yusuf S, Hawken S, Ounpuu S, Bautista L, Franzosi MG, Commerford P, Lang CC, Rumboldt Z, Onen CL, Lisheng L, Tanomsup S, Wangai P Jr, Razak F, Sharma AM, Anand SS; INTERHEART Study Investigators. Obesity and the risk of myocardial infarction in 27,000 participants from 52 countries: a case-control study. *Lancet* 2005;366(9497):1640-9.
31. The World Health Report 2002: reducing risks, promoting healthy life. Geneva, World Health Organization, 2002.
32. Chowdhury R, Warnakula S, Kunutsor S, Crowe F, Ward HA, Johnson L, Franco OH, Butterworth AS, Forouhi NG, Thompson SG, Khaw KT, Mozaffarian D, Danesh J, Di Angelantonio E. Association of dietary, circulating, and supplement fatty acids with coronary risk: a systematic review and meta-analysis. *Ann Intern Med*. 2014 Mar 18;160(6):398-406. doi: 10.7326/M13-1788.
33. Huxley RR, Woodward, M. Cigarette smoking as a risk factor for coronary heart disease in women compared with men: a systematic review and meta-analysis of prospective cohort studies. *Lancet*. 2011;378(9799):1297-305.
34. Global Adult Tobacco Survey. Pakistan Fact sheet 2014. <http://www.who.int/tobacco/surveillance/survey/gats/pakfactsheet.pdf>



**Table 1.** Demographic and socioeconomic characteristics of participants by exposure category.

| Characteristic                          | All women (n=850) |        | Users of biomass (n=436) |        | Non-users of biomass (n=414) |        | Long-term users of biomass (n=430) |        | Long-term non-users of biomass (n=263) |        |
|-----------------------------------------|-------------------|--------|--------------------------|--------|------------------------------|--------|------------------------------------|--------|----------------------------------------|--------|
|                                         | <i>N</i>          | (%)    | <i>n</i>                 | (%)    | <i>n</i>                     | (%)    | <i>n</i>                           | (%)    | <i>n</i>                               | (%)    |
| <b>Age (years)</b>                      |                   |        |                          |        |                              |        |                                    |        |                                        |        |
| <50                                     | 525               | (61.8) | 263                      | (60.3) | 262                          | (63.3) | 257                                | (59.8) | 166                                    | (63.1) |
| ≥50                                     | 325               | (38.2) | 173                      | (39.7) | 152                          | (36.7) | 173                                | (40.2) | 97                                     | (36.9) |
| <b>Educational status</b>               |                   |        |                          |        |                              |        |                                    |        |                                        |        |
| No literacy                             | 797               | (93.8) | 419                      | (96.1) | 378                          | (91.3) | 413                                | (96.1) | 239                                    | (90.9) |
| Any literacy                            | 53                | (6.2)  | 17                       | (3.9)  | 36                           | (8.7)  | 17                                 | (4.0)  | 24                                     | (9.1)  |
| <b>Household income/month</b>           |                   |        |                          |        |                              |        |                                    |        |                                        |        |
| ≤10000PKR                               | 651               | (76.6) | 351                      | (80.5) | 300                          | (72.5) | 347                                | (80.7) | 185                                    | (70.3) |
| >10000PKR                               | 199               | (23.4) | 85                       | (19.5) | 114                          | (27.5) | 83                                 | (19.3) | 78                                     | (29.7) |
| <b>Household tenure</b>                 |                   |        |                          |        |                              |        |                                    |        |                                        |        |
| Rented                                  | 70                | (8.2)  | 25                       | (5.7)  | 45                           | (10.9) | 25                                 | (5.8)  | 20                                     | (7.6)  |
| Owned                                   | 780               | (91.8) | 411                      | (94.3) | 369                          | (89.1) | 405                                | (94.2) | 243                                    | (92.4) |
| <b>Construction of house</b>            |                   |        |                          |        |                              |        |                                    |        |                                        |        |
| Katcha/ semi-pucca                      | 652               | (76.7) | 361                      | (82.8) | 291                          | (70.3) | 356                                | (82.8) | 173                                    | (65.8) |
| Pucca                                   | 198               | (23.3) | 75                       | (17.2) | 123                          | (29.7) | 74                                 | (17.2) | 90                                     | (34.2) |
| <b>Number of household assets</b>       |                   |        |                          |        |                              |        |                                    |        |                                        |        |
| Low (0-1)                               | 268               | (31.5) | 140                      | (32.1) | 128                          | (30.9) | 139                                | (32.3) | 84                                     | (31.9) |
| Medium (2-3)                            | 404               | (47.5) | 223                      | (51.2) | 181                          | (43.7) | 218                                | (50.7) | 108                                    | (41.1) |
| High (≥4)                               | 178               | (21.0) | 73                       | (16.7) | 105                          | (25.4) | 73                                 | (17.0) | 71                                     | (27.0) |
| <b>Father's occupation in childhood</b> |                   |        |                          |        |                              |        |                                    |        |                                        |        |
| Non-manual                              | 39                | (4.6)  | 19                       | (4.4)  | 20                           | (4.8)  | 18                                 | (4.2)  | 16                                     | (6.1)  |
| Manual                                  | 811               | (95.4) | 417                      | (95.6) | 394                          | (95.2) | 412                                | (95.8) | 247                                    | (93.9) |

**Table 2.** Current and past cooking arrangements according to exposure category.

| Characteristic                                            | Users of biomass<br>(n=436) |        | Non-users of<br>biomass<br>(n=414) |        | Long-term users<br>of biomass<br>(n=430) |        | Long-term non-users<br>of biomass<br>(n=263) |        |
|-----------------------------------------------------------|-----------------------------|--------|------------------------------------|--------|------------------------------------------|--------|----------------------------------------------|--------|
|                                                           | n                           | (%)    | n                                  | (%)    | n                                        | (%)    | n                                            | (%)    |
| <b><i>Ever used biomass for cooking</i></b>               | 436                         | (100)  | 382                                | (92.3) | 430                                      | (100)  | 231                                          | (87.8) |
| <b><i>Years since last used biomass for cooking</i></b>   |                             |        |                                    |        |                                          |        |                                              |        |
| Current user                                              | 436                         | (100)  | -                                  | -      | 430                                      | (100)  | -                                            | -      |
| 2-9                                                       | -                           | -      | 151                                | (39.5) | -                                        | -      | -                                            | -      |
| ≥10                                                       | -                           | -      | 231                                | (60.5) | -                                        | -      | 231                                          | (100)  |
| <b><i>Ever used wood for cooking</i></b>                  | 435                         | (99.8) | 358                                | (86.5) | 429                                      | (99.8) | 218                                          | (82.9) |
| <b><i>Ever used cow dung for cooking</i></b>              | 422                         | (96.8) | 358                                | (86.5) | 416                                      | (96.7) | 216                                          | (82.1) |
| <b><i>Ever used kerosene for cooking</i></b>              | 16                          | (3.7)  | 26                                 | (6.3)  | 16                                       | (3.7)  | 17                                           | (6.5)  |
| <b><i>Ever used LPG/natural gas for cooking</i></b>       | 17                          | (3.9)  | 413                                | (99.8) | 15                                       | (3.5)  | 263                                          | (100)  |
| <b><i>Average hours per day cooked in past year</i></b>   |                             |        |                                    |        |                                          |        |                                              |        |
| ≤1                                                        | 129                         | (29.6) | 133                                | (32.1) | 123                                      | (28.6) | 75                                           | (28.5) |
| 2-3                                                       | 270                         | (61.9) | 237                                | (57.3) | 270                                      | (62.8) | 165                                          | (62.7) |
| ≥4                                                        | 37                          | (8.5)  | 44                                 | (10.6) | 37                                       | (8.6)  | 23                                           | (8.8)  |
| <b><i>Type of stove used for cooking</i></b>              |                             |        |                                    |        |                                          |        |                                              |        |
| Gas/LPG                                                   | 2                           | (0.5)  | 414                                | (100)  | 2                                        | (0.5)  | 263                                          | (100)  |
| Biomass with chimney/improved stove                       | 166                         | (38.1) | -                                  | -      | 164                                      | (38.1) | -                                            | -      |
| Biomass with three brick open stove                       | 267                         | (61.2) | -                                  | -      | 263                                      | (61.2) | -                                            | -      |
| Other                                                     | 1                           | (0.2)  | -                                  | -      | 1                                        | (0.2)  | -                                            | -      |
| <b><i>Type of kitchen</i></b>                             |                             |        |                                    |        |                                          |        |                                              |        |
| Closed (four walls – linked with living room or separate) | 88                          | (20.2) | 116                                | (28.0) | 86                                       | (20.0) | 79                                           | (30.0) |
| Semi-open (fewer than four walls)                         | 189                         | (43.3) | 155                                | (37.4) | 187                                      | (43.5) | 94                                           | (35.7) |
| Open (no walls)                                           | 159                         | (36.5) | 143                                | (34.5) | 157                                      | (36.5) | 90                                           | (34.2) |
| <b><i>Heat home with biomass</i></b>                      | 237                         | (54.4) | 106                                | (25.6) | 236                                      | (54.9) | 74                                           | (28.1) |

**Table 3.** Distribution of risk factors across the four exposure categories.

| Characteristic                                                                                                        | Users of biomass (n=436) |        | Non-users of biomass (n=414) |        | Long-term users of biomass (n=430) |        | Long-term non-users of biomass (n=263) |        |
|-----------------------------------------------------------------------------------------------------------------------|--------------------------|--------|------------------------------|--------|------------------------------------|--------|----------------------------------------|--------|
|                                                                                                                       | n                        | (%)    | n                            | (%)    | n                                  | (%)    | n                                      | (%)    |
| <b>Birthweight</b>                                                                                                    |                          |        |                              |        |                                    |        |                                        |        |
| Lower than normal                                                                                                     | 117                      | (26.8) | 77                           | (18.6) | 114                                | (26.5) | 54                                     | (20.5) |
| Normal                                                                                                                | 239                      | (54.8) | 254                          | (61.4) | 237                                | (55.1) | 156                                    | (59.3) |
| Higher than normal                                                                                                    | 80                       | (18.4) | 83                           | (20.0) | 79                                 | (18.4) | 53                                     | (20.2) |
| No                                                                                                                    | 176                      | (40.4) | 176                          | (42.5) | 175                                | (40.7) | 122                                    | (46.4) |
| Yes                                                                                                                   | 260                      | (59.6) | 238                          | (57.5) | 255                                | (59.3) | 141                                    | (53.6) |
| <b>Lost weight during childhood</b>                                                                                   |                          |        |                              |        |                                    |        |                                        |        |
| No                                                                                                                    | 162                      | (37.2) | 182                          | (44.0) | 160                                | (37.2) | 119                                    | (45.2) |
| Yes                                                                                                                   | 274                      | (62.8) | 232                          | (56.0) | 270                                | (62.8) | 144                                    | (54.8) |
| <b>Ever smoked regularly (any of cigarettes, bidi, huqqa)</b>                                                         |                          |        |                              |        |                                    |        |                                        |        |
| Never                                                                                                                 | 390                      | (89.4) | 378                          | (91.3) | 384                                | (89.3) | 240                                    | (91.3) |
| Ever                                                                                                                  | 46                       | (10.6) | 36                           | (8.7)  | 46                                 | (10.7) | 23                                     | (8.7)  |
| <b>Environmental tobacco smoke (at least one other household member smoked cigarettes, bidi or huqqa in the home)</b> |                          |        |                              |        |                                    |        |                                        |        |
| No                                                                                                                    | 269                      | (61.7) | 267                          | (64.5) | 265                                | (61.6) | 173                                    | (65.8) |
| Yes                                                                                                                   | 167                      | (38.3) | 147                          | (35.5) | 165                                | (38.4) | 90                                     | (34.2) |
| <b>Physical activity score</b>                                                                                        |                          |        |                              |        |                                    |        |                                        |        |
| 0-2                                                                                                                   | 124                      | (28.4) | 205                          | (49.5) | 124                                | (28.8) | 149                                    | (56.7) |
| 3-4                                                                                                                   | 199                      | (45.6) | 156                          | (37.7) | 196                                | (45.6) | 91                                     | (34.6) |
| 5-6                                                                                                                   | 113                      | (25.9) | 53                           | (12.8) | 110                                | (25.6) | 23                                     | (8.7)  |
| <b>Consumption of meat or eggs</b>                                                                                    |                          |        |                              |        |                                    |        |                                        |        |
| Do not eat either meat or eggs as much as once per week                                                               | 173                      | (39.7) | 142                          | (34.3) | 172                                | (40.0) | 88                                     | (33.5) |
| Eat one of meat or eggs as much as once per week                                                                      | 176                      | (40.4) | 163                          | (39.4) | 173                                | (40.2) | 100                                    | (38.0) |
| Eat both meat and eggs at least once per week                                                                         | 87                       | (20.0) | 109                          | (26.3) | 85                                 | (19.8) | 75                                     | (28.5) |
| <b>Current nutrition<sup>a</sup></b>                                                                                  |                          |        |                              |        |                                    |        |                                        |        |
| Neither BMI nor WHR high                                                                                              | 183                      | (42.0) | 129                          | (31.2) | 179                                | (41.6) | 79                                     | (30.0) |
| One of BMI or WHR high                                                                                                | 151                      | (34.6) | 160                          | (38.7) | 149                                | (34.7) | 101                                    | (38.4) |
| Both BMI and WHR high                                                                                                 | 102                      | (23.4) | 124                          | (30.0) | 102                                | (23.7) | 82                                     | (31.2) |
| Not known                                                                                                             | 0                        | (0)    | 1                            | (0.2)  | 0                                  | (0)    | 1                                      | (0.4)  |

<sup>a</sup>BMI (kg/m<sup>2</sup>) ≥25= high; WHR ≥0.85=high.

**Table 4.** Associations of hypertension, angina, history of heart attack, and definite or probable CHD on ECG with current and long-term use of biomass for cooking.

| Outcome                                | Adjusted only for age (n=850) |           | Fully adjusted <sup>a</sup> (n=850) |           | Fully adjusted and limited to long-term users and non-users of biomass <sup>b</sup> (n=693) |           |
|----------------------------------------|-------------------------------|-----------|-------------------------------------|-----------|---------------------------------------------------------------------------------------------|-----------|
|                                        | OR                            | (95%CI)   | OR                                  | (95% CI)  | OR                                                                                          | (95% CI)  |
| <b>Hypertension</b>                    |                               |           |                                     |           |                                                                                             |           |
| Non-users of biomass                   | 1.0                           |           | 1.0                                 |           | 1.0                                                                                         |           |
| Users of biomass                       | 1.2                           | (0.9-1.5) | 1.0                                 | (0.8-1.4) | 1.1                                                                                         | (0.8-1.6) |
| <b>Angina</b>                          |                               |           |                                     |           |                                                                                             |           |
| Non-users of biomass                   | 1.0                           |           | 1.0                                 |           | 1.0                                                                                         |           |
| Users of biomass                       | 1.0                           | (0.7-1.3) | 1.0                                 | (0.8-1.4) | 1.3                                                                                         | (0.9-1.9) |
| <b>Heart Attack</b>                    |                               |           |                                     |           |                                                                                             |           |
| Non-users of biomass                   | 1.0                           |           | 1.0                                 |           | 1.0                                                                                         |           |
| Users of biomass                       | 1.4                           | (0.8-2.4) | 1.2                                 | (0.7-2.2) | 1.3                                                                                         | (0.7-2.4) |
| <b>Definite or probable CHD on ECG</b> |                               |           |                                     |           |                                                                                             |           |
| Non-users of biomass                   | 1.0                           |           | 1.0                                 |           | 1.0                                                                                         |           |
| Users of biomass user                  | 0.8                           | (0.6-1.2) | 0.8                                 | (0.6-1.2) | 0.9                                                                                         | (0.6-1.3) |

<sup>a</sup>Mutually adjusted risk estimates derived from a single regression model that included use of biomass and all of the variables that were significant ( $p < 0.1$ ) in analyses adjusted only for age

<sup>b</sup>Mutually adjusted risk estimates derived from a single regression model that included use of biomass and all of the variables that were significant ( $p < 0.1$ ) in analyses adjusted only for age, but was restricted to women who were long-term users or non-users of biomass

## Supplementary Materials

**Supplementary Table 1.** Prevalence of hypertension, history of heart attack, angina and coronary heart disease in study sample.

| Characteristic                                       | n   | (%)    |
|------------------------------------------------------|-----|--------|
| <b>Hypertension</b>                                  |     |        |
| Systolic hypertension (systolic BP $\geq$ 140 mmHg)  | 133 | (15.8) |
| Diastolic hypertension (diastolic BP $\geq$ 90 mmHg) | 102 | (12.1) |
| Regular medication for high blood pressure           | 198 | (23.5) |
| Hypertension (any of the above)                      | 297 | (35.3) |
| <b>Angina</b>                                        | 227 | (27.0) |
| <b>History of heart attack</b>                       | 54  | (6.4)  |
| <b>Definite or probable CHD on ECG<sup>a</sup></b>   | 159 | (18.9) |

<sup>a</sup>Based on 841 women. ECGs for 9 women were missing or could not be coded due to poor quality.

**Supplementary Table 2.** Classification of ECGs for definite or probable CHD by two observers.

| <b>Observer 1</b> | <b>Observer 2</b> |                 |
|-------------------|-------------------|-----------------|
|                   | <b>Negative</b>   | <b>Positive</b> |
| <b>Negative</b>   | 591               | 30              |
| <b>Positive</b>   | 94                | 122             |

**Kappa = 0.57**

For peer review only

**Supplementary Table 3.** Prevalence of definite or probable CHD changes on ECG according to history of heart attack and angina.

| Other measure of CHD                 | Definite or probable CHD changes on ECG <sup>a</sup> |        |     |        |
|--------------------------------------|------------------------------------------------------|--------|-----|--------|
|                                      | Yes                                                  |        | No  |        |
|                                      | n                                                    | (%)    | N   | (%)    |
| No history of heart attack or angina | 105                                                  | (18.2) | 471 | (81.8) |
| History of angina                    | 45                                                   | (19.8) | 182 | (80.2) |
| History of heart attack              | 14                                                   | (25.9) | 40  | (74.1) |
| History of angina or heart attack    | 54                                                   | (20.4) | 211 | (79.6) |
| History of angina and heart attack   | 5                                                    | (31.3) | 11  | (68.8) |

<sup>a</sup>ECGs for 9 women were missing or could not be coded due to poor quality.

For peer review only



**Supplementary Table 4.** Association of hypertension with risk factors.

| Risk factor                                                                                                                       | Adjusted only<br>for age<br>(n=850) |           | Fully adjusted <sup>a</sup><br>(n=850) |           | Fully adjusted and<br>limited to long-<br>term users and<br>non-users of<br>biomass <sup>b</sup><br>(n=693) |           |
|-----------------------------------------------------------------------------------------------------------------------------------|-------------------------------------|-----------|----------------------------------------|-----------|-------------------------------------------------------------------------------------------------------------|-----------|
|                                                                                                                                   | OR                                  | (95%CI)   | OR                                     | (95%CI)   | OR                                                                                                          | (95%CI)   |
| <b>Age (per 10 year increase)</b>                                                                                                 | 1.4                                 | (1.2-1.6) | 1.4                                    | (1.2-1.7) | 1.5                                                                                                         | (1.2-1.7) |
| <b>Educational status</b>                                                                                                         |                                     |           |                                        |           |                                                                                                             |           |
| Illiterate                                                                                                                        | 1.0                                 |           | -                                      |           | -                                                                                                           |           |
| Any literacy                                                                                                                      | 0.6                                 | (0.3-1.2) |                                        |           |                                                                                                             |           |
| <b>Household income/month</b>                                                                                                     |                                     |           |                                        |           |                                                                                                             |           |
| <3000-10000PKR                                                                                                                    | 1.0                                 |           | -                                      |           | -                                                                                                           |           |
| >10000PKR                                                                                                                         | 1.0                                 | (0.7-1.4) |                                        |           |                                                                                                             |           |
| <b>Household ownership</b>                                                                                                        |                                     |           |                                        |           |                                                                                                             |           |
| Rented                                                                                                                            | 1.0                                 |           | -                                      |           | -                                                                                                           |           |
| Own                                                                                                                               | 0.8                                 | (0.5-1.3) |                                        |           |                                                                                                             |           |
| <b>Construction of house</b>                                                                                                      |                                     |           |                                        |           |                                                                                                             |           |
| Katcha/semi-pucca                                                                                                                 | 1.0                                 |           | -                                      |           | -                                                                                                           |           |
| Pucca                                                                                                                             | 0.9                                 | (0.6-1.2) |                                        |           |                                                                                                             |           |
| <b>Number of household assets</b>                                                                                                 |                                     |           |                                        |           |                                                                                                             |           |
| 0-1                                                                                                                               | 1.0                                 |           | 1.0                                    |           | 1.0                                                                                                         |           |
| 2-3                                                                                                                               | 1.7                                 | (1.2-2.4) | 1.6                                    | (1.2-2.3) | 1.8                                                                                                         | (1.2-2.6) |
| ≥4                                                                                                                                | 2.4                                 | (1.6-3.6) | 2.3                                    | (1.5-3.4) | 2.7                                                                                                         | (1.7-4.3) |
| <b>Father's occupation in woman's<br/>childhood</b>                                                                               |                                     |           |                                        |           |                                                                                                             |           |
| Non-manual                                                                                                                        | 1.0                                 |           | -                                      |           | -                                                                                                           |           |
| Manual                                                                                                                            | 1.2                                 | (0.6-2.5) |                                        |           |                                                                                                             |           |
| <b>Birthweight</b>                                                                                                                |                                     |           |                                        |           |                                                                                                             |           |
| Lower than normal                                                                                                                 | 1.0                                 |           | -                                      |           | -                                                                                                           |           |
| Normal                                                                                                                            | 1.0                                 | (0.7-1.4) | -                                      |           | -                                                                                                           |           |
| Higher than normal                                                                                                                | 1.0                                 | (0.6-1.5) |                                        |           |                                                                                                             |           |
| <b>Ever hungry during all the time<br/>during childhood because there<br/>was not enough food</b>                                 |                                     |           |                                        |           |                                                                                                             |           |
| No                                                                                                                                | 1.0                                 |           | -                                      |           | -                                                                                                           |           |
| Yes                                                                                                                               | 0.9                                 | (0.7-1.3) |                                        |           |                                                                                                             |           |
| <b>Lost weight during childhood</b>                                                                                               |                                     |           |                                        |           |                                                                                                             |           |
| No                                                                                                                                | 1.0                                 |           | -                                      |           | -                                                                                                           |           |
| Yes                                                                                                                               | 1.2                                 | (0.9-1.6) |                                        |           |                                                                                                             |           |
| <b>Ever smoked regularly (any of<br/>cigarettes, bidi, huqqa)</b>                                                                 |                                     |           |                                        |           |                                                                                                             |           |
| Never                                                                                                                             | 1.0                                 |           | -                                      |           | -                                                                                                           |           |
| Ever                                                                                                                              | 0.8                                 | (0.5-1.3) |                                        |           |                                                                                                             |           |
| <b>Environmental tobacco smoke (at<br/>least one other household member<br/>smokes cigarettes, bidi or huqqa<br/>in the home)</b> |                                     |           |                                        |           |                                                                                                             |           |
| No                                                                                                                                | 1.0                                 |           | -                                      |           | -                                                                                                           |           |
| Yes                                                                                                                               | 0.8                                 | (0.6-1.1) |                                        |           |                                                                                                             |           |
| <b>Consumption of meat or eggs</b>                                                                                                |                                     |           |                                        |           |                                                                                                             |           |

|                                                         |     |           |     |           |     |           |
|---------------------------------------------------------|-----|-----------|-----|-----------|-----|-----------|
| Do not eat either meat or eggs as much as once per week | 1.0 |           | 1.0 |           | 1.0 |           |
| Eat one of meat or eggs as much as once per week        | 1.4 | (1.0-1.9) | 1.2 | (0.9-1.7) | 1.2 | (0.8-1.7) |
| Eat both meat and eggs at least once per week           | 1.4 | (1.0-2.1) | 1.2 | (0.8-1.8) | 1.2 | (0.8-1.9) |
| <b>Current nutrition<sup>c</sup></b>                    |     |           |     |           |     |           |
| Neither BMI nor WHR high                                | 1.0 |           | 1.0 |           | 1.0 |           |
| One of BMI or WHR high                                  | 1.2 | (0.9-1.7) | 1.2 | (0.8-1.6) | 1.2 | (0.8-1.8) |
| Both BMI and WHR high                                   | 2.0 | (1.4-2.9) | 1.9 | (1.3-2.8) | 1.8 | (1.2-2.7) |
| <b>Non-user of biomass</b>                              | 1.0 |           | 1.0 |           |     |           |
| <b>User of biomass</b>                                  | 1.2 | (0.9-1.5) | 1.0 | (0.8-1.4) |     |           |
| <b>Long-term non-user of biomass</b>                    | 1.0 |           |     |           | 1.0 |           |
| <b>Long-term user of biomass</b>                        | 1.2 | (0.9-1.7) |     |           | 1.1 | (0.8-1.6) |

<sup>a</sup>Mutually adjusted risk estimates derived from a single regression model that included use of biomass and all of the variables that were significant ( $p < 0.1$ ) in analyses adjusted only for age

<sup>b</sup>Mutually adjusted risk estimates derived from a single regression model that included use of biomass and all of the variables that were significant ( $p < 0.1$ ) in analyses adjusted only for age, but was restricted to women who were long-term users or non-users of biomass

<sup>c</sup>Body mass index (BMI) ( $\text{kg}/\text{m}^2$ )  $\geq 25$  = high; Waist-to-hip ratio (WHR)  $\geq 0.85$  = high.

**Supplementary Table 5.** Associations of angina with risk factors.

| Risk factor                                                                                                                       | Adjusted only<br>for age<br>(n=850) |           | Fully adjusted <sup>a</sup><br>(n=850) |           | Fully adjusted and<br>limited to long-<br>term users and<br>non-users of<br>biomass <sup>b</sup><br>(n=693) |           |
|-----------------------------------------------------------------------------------------------------------------------------------|-------------------------------------|-----------|----------------------------------------|-----------|-------------------------------------------------------------------------------------------------------------|-----------|
|                                                                                                                                   | OR                                  | (95%CI)   | OR                                     | (95%CI)   | OR                                                                                                          | (95%CI)   |
| <b>Age (per 10 year increase)</b>                                                                                                 | 1.3                                 | (1.1-1.6) | 1.3                                    | (1.1-1.5) | 1.3                                                                                                         | (1.1-1.5) |
| <b>Educational status</b>                                                                                                         |                                     |           |                                        |           |                                                                                                             |           |
| Illiterate                                                                                                                        | 1.0                                 |           | -                                      |           | -                                                                                                           |           |
| Any literacy                                                                                                                      | 0.6                                 | (0.3-1.3) |                                        |           |                                                                                                             |           |
| <b>Household income/month</b>                                                                                                     |                                     |           |                                        |           |                                                                                                             |           |
| <3000-10000PKR                                                                                                                    | 1.0                                 |           | -                                      |           | -                                                                                                           |           |
| >10000PKR                                                                                                                         | 1.1                                 | (0.8-1.6) |                                        |           |                                                                                                             |           |
| <b>Household ownership</b>                                                                                                        |                                     |           |                                        |           |                                                                                                             |           |
| Rented                                                                                                                            | 1.0                                 |           | -                                      |           | -                                                                                                           |           |
| Own                                                                                                                               | 0.8                                 | (0.5-1.3) |                                        |           |                                                                                                             |           |
| <b>Construction of house</b>                                                                                                      |                                     |           |                                        |           |                                                                                                             |           |
| Katcha/semi-pucca                                                                                                                 | 1.0                                 |           | -                                      |           | -                                                                                                           |           |
| Pucca                                                                                                                             | 1.2                                 | (0.8-1.7) |                                        |           |                                                                                                             |           |
| <b>Number of household assets</b>                                                                                                 |                                     |           |                                        |           |                                                                                                             |           |
| 0-1                                                                                                                               | 1.0                                 |           | -                                      |           | -                                                                                                           |           |
| 2-3                                                                                                                               | 0.9                                 | (0.6-1.3) |                                        |           |                                                                                                             |           |
| ≥4                                                                                                                                | 1.0                                 | (0.6-1.5) |                                        |           |                                                                                                             |           |
| <b>Father's occupation in woman's<br/>childhood</b>                                                                               |                                     |           |                                        |           |                                                                                                             |           |
| Non-manual                                                                                                                        | 1.0                                 |           | -                                      |           | -                                                                                                           |           |
| Manual                                                                                                                            | 0.7                                 | (0.3-1.4) |                                        |           |                                                                                                             |           |
| <b>Birthweight</b>                                                                                                                |                                     |           |                                        |           |                                                                                                             |           |
| Lower than normal                                                                                                                 | 1.0                                 |           | -                                      |           | -                                                                                                           |           |
| Normal                                                                                                                            | 1.2                                 | (0.8-1.8) | -                                      |           | -                                                                                                           |           |
| Higher than normal                                                                                                                | 1.1                                 | (0.7-1.8) |                                        |           |                                                                                                             |           |
| <b>Ever hungry during all the time<br/>during childhood because there<br/>was not enough food</b>                                 |                                     |           |                                        |           |                                                                                                             |           |
| No                                                                                                                                | 1.0                                 |           | -                                      |           | -                                                                                                           |           |
| Yes                                                                                                                               | 0.8                                 | (0.6-1.1) |                                        |           |                                                                                                             |           |
| <b>Lost weight during childhood</b>                                                                                               |                                     |           |                                        |           |                                                                                                             |           |
| No                                                                                                                                | 1.0                                 |           | -                                      |           | -                                                                                                           |           |
| Yes                                                                                                                               | 1.0                                 | (0.8-1.4) |                                        |           |                                                                                                             |           |
| <b>Ever smoked regularly (any of<br/>cigarettes, bidi, huqqa)</b>                                                                 |                                     |           |                                        |           |                                                                                                             |           |
| Never                                                                                                                             | 1.0                                 |           | 1.0                                    |           | 1.0                                                                                                         |           |
| Ever                                                                                                                              | 2.1                                 | (1.3-3.3) | 2.0                                    | (1.2-3.2) | 2.1                                                                                                         | (1.3-3.6) |
| <b>Environmental tobacco smoke<br/>(at least one other household<br/>member smokes cigarettes, bidi<br/>or huqqa in the home)</b> |                                     |           |                                        |           |                                                                                                             |           |
| No                                                                                                                                | 1.0                                 |           | -                                      |           | -                                                                                                           |           |
| Yes                                                                                                                               | 1.2                                 | (0.9-1.6) |                                        |           |                                                                                                             |           |
| <b>Consumption of meat or eggs</b>                                                                                                |                                     |           |                                        |           |                                                                                                             |           |

|                                                         |     |           |     |           |     |           |
|---------------------------------------------------------|-----|-----------|-----|-----------|-----|-----------|
| Do not eat either meat or eggs as much as once per week | 1.0 |           | 1.0 |           | 1.0 |           |
| Eat one of meat or eggs as much as once per week        | 0.6 | (0.4-0.8) | 0.6 | (0.4-0.8) | 0.7 | (0.5-1.0) |
| Eat both meat and eggs at least once per week           | 0.4 | (0.3-0.7) | 0.5 | (0.3-0.7) | 0.5 | (0.3-0.8) |
| <b>Current nutrition<sup>c</sup></b>                    |     |           |     |           |     |           |
| Neither BMI nor WHR high                                | 1.0 |           |     |           |     |           |
| One of BMI or WHR high                                  | 0.8 | (0.5-1.1) | -   |           |     |           |
| Both BMI and WHR high                                   | 0.8 | (0.5-1.2) |     |           |     |           |
| <b>Non-user of biomass</b>                              | 1.0 |           |     |           |     |           |
| <b>User of biomass user</b>                             | 1.0 | (0.7-1.3) | 1.0 | (0.8-1.4) |     |           |
| <b>Long-term non-user of biomass</b>                    | 1.0 |           |     |           | 1.0 |           |
| <b>Long-term non-user of biomass</b>                    | 1.2 | (0.9-1.7) |     |           | 1.3 | (0.9-1.9) |

<sup>a</sup>Mutually adjusted risk estimates derived from a single regression model that included use of biomass and all of the variables that were significant ( $p < 0.1$ ) in analyses adjusted only for age

<sup>b</sup>Mutually adjusted risk estimates derived from a single regression model that included use of biomass and all of the variables that were significant ( $p < 0.1$ ) in analyses adjusted only for age, but was restricted to women who were long-term users or non-users of biomass

<sup>c</sup>Body mass index (BMI) ( $\text{kg}/\text{m}^2$ )  $\geq 25$  = high; Waist-to-hip ratio (WHR)  $\geq 0.85$  = high.

**Supplementary Table 6.** Associations of previous history of heart attack (diagnosed by a physician) with risk factors.

| Risk factor                                                                                                                       | Adjusted only<br>for age<br>(n=850) <sup>a</sup> |           | Fully adjusted <sup>b</sup><br>(n=850) |           | Fully adjusted and<br>limited to long-term<br>users and non-users of<br>biomass <sup>c</sup><br>(n=693) |           |
|-----------------------------------------------------------------------------------------------------------------------------------|--------------------------------------------------|-----------|----------------------------------------|-----------|---------------------------------------------------------------------------------------------------------|-----------|
|                                                                                                                                   | OR                                               | (95%CI)   | OR                                     | (95%CI)   | OR                                                                                                      | (95%CI)   |
| <b>Age (per 10 year increase)</b>                                                                                                 | 1.5                                              | (1.2-2.0) | 1.5                                    | (1.2-2.0) | 1.5                                                                                                     | (1.2-2.0) |
| <b>Educational status</b>                                                                                                         |                                                  |           |                                        |           |                                                                                                         |           |
| Illiterate                                                                                                                        | 1.0                                              |           | -                                      |           | -                                                                                                       |           |
| Any literacy                                                                                                                      | 1.5                                              | (0.5-4.5) |                                        |           |                                                                                                         |           |
| <b>Household income/month</b>                                                                                                     |                                                  |           |                                        |           |                                                                                                         |           |
| <3000-10000PKR                                                                                                                    | 1.0                                              |           | 1.0                                    |           | 1.0                                                                                                     |           |
| >10000PKR                                                                                                                         | 1.6                                              | (0.9-2.9) | 1.4                                    | (0.8-2.5) | 1.6                                                                                                     | (0.8-3.1) |
| <b>Household ownership</b>                                                                                                        |                                                  |           |                                        |           |                                                                                                         |           |
| Rented                                                                                                                            | 1.0                                              |           | -                                      |           | -                                                                                                       |           |
| Own                                                                                                                               | 1.2                                              | (0.4-3.4) |                                        |           |                                                                                                         |           |
| <b>Construction of house</b>                                                                                                      |                                                  |           |                                        |           |                                                                                                         |           |
| Katcha/semi-pucca                                                                                                                 |                                                  |           | -                                      |           | -                                                                                                       |           |
| Pucca                                                                                                                             | 1.3                                              | (0.7-2.3) |                                        |           |                                                                                                         |           |
| <b>Number of household assets</b>                                                                                                 |                                                  |           |                                        |           |                                                                                                         |           |
| 0-1                                                                                                                               | 1.0                                              |           | 1.0                                    |           | 1.0                                                                                                     |           |
| 2-3                                                                                                                               | 1.4                                              | (0.7-2.7) | 1.3                                    | (0.7-2.5) | 1.8                                                                                                     | (0.8-3.8) |
| ≥4                                                                                                                                | 2.1                                              | (1.0-4.3) | 1.8                                    | (0.8-3.8) | 2.1                                                                                                     | (0.9-5.1) |
| <b>Father's occupation in woman's<br/>childhood</b>                                                                               |                                                  |           |                                        |           |                                                                                                         |           |
| Non-manual                                                                                                                        | 1.0                                              |           | -                                      |           | -                                                                                                       |           |
| Manual                                                                                                                            | 1.0                                              | (0.2-4.5) |                                        |           |                                                                                                         |           |
| <b>Birthweight</b>                                                                                                                |                                                  |           |                                        |           |                                                                                                         |           |
| Lower than normal                                                                                                                 | 1.0                                              |           |                                        |           | -                                                                                                       |           |
| Normal                                                                                                                            | 1.0                                              | (0.5-1.9) | -                                      |           |                                                                                                         |           |
| Higher than normal                                                                                                                | 0.7                                              | (0.3-1.7) |                                        |           |                                                                                                         |           |
| <b>Ever hungry during all the time<br/>during childhood because there<br/>was not enough food</b>                                 |                                                  |           |                                        |           |                                                                                                         |           |
| No                                                                                                                                | 1.0                                              |           | -                                      |           | -                                                                                                       |           |
| Yes                                                                                                                               | 1.0                                              | (0.6-1.7) |                                        |           |                                                                                                         |           |
| <b>Lost weight during childhood</b>                                                                                               |                                                  |           |                                        |           |                                                                                                         |           |
| No                                                                                                                                | 1.0                                              |           | -                                      |           | -                                                                                                       |           |
| Yes                                                                                                                               | 1.1                                              | (0.6-1.9) |                                        |           |                                                                                                         |           |
| <b>Ever smoked regularly (any of<br/>cigarettes, bidi, huqqa)</b>                                                                 |                                                  |           |                                        |           |                                                                                                         |           |
| Never                                                                                                                             | 1.0                                              |           | -                                      |           | -                                                                                                       |           |
| Ever                                                                                                                              | 0.9                                              | (0.4-2.1) |                                        |           |                                                                                                         |           |
| <b>Environmental tobacco smoke (at<br/>least one other household member<br/>smokes cigarettes, bidi or huqqa in<br/>the home)</b> |                                                  |           |                                        |           |                                                                                                         |           |
| No                                                                                                                                | 1.0                                              |           | -                                      |           | -                                                                                                       |           |
| Yes                                                                                                                               | 0.9                                              | (0.5-1.6) |                                        |           |                                                                                                         |           |
| <b>Consumption of meat or eggs</b>                                                                                                |                                                  |           |                                        |           |                                                                                                         |           |

|                                                         |     |           |     |           |               |
|---------------------------------------------------------|-----|-----------|-----|-----------|---------------|
| Do not eat either meat or eggs as much as once per week | 1.0 |           | -   |           |               |
| Eat one of meat or eggs as much as once per week        | 1.2 | (0.6-2.3) |     |           |               |
| Eat both meat and eggs at least once per week           | 1.8 | (0.9-3.5) |     |           |               |
| <b>Current nutrition<sup>d</sup></b>                    |     |           |     |           |               |
| Neither BMI nor WHR high                                | 1.0 |           | 1.0 | 1.0       |               |
| One of BMI or WHR high                                  | 1.3 | (0.6-2.5) | 1.2 | (0.6-2.5) | 1.6 (0.7-3.4) |
| Both BMI and WHR high                                   | 2.0 | (1.0-4.0) | 1.9 | (0.9-3.7) | 1.7 (0.8-3.6) |
| <b>Non-user of biomass</b>                              | 1.0 |           | 1.0 | -         |               |
| <b>Use of biomass</b>                                   | 1.4 | (0.8-2.4) | 1.2 | (0.7-2.2) |               |
| <b>Long-term non-user of biomass</b>                    | 1.0 |           |     | 1.0       |               |
| <b>Long-term user of biomass</b>                        | 1.5 | (0.8-2.7) |     | 1.3       | (0.7-2.4)     |

<sup>a</sup>Mutually adjusted risk estimates derived from a single regression model that included use of biomass and all of the variables that were significant ( $p < 0.1$ ) in analyses adjusted only for age

<sup>b</sup>Mutually adjusted risk estimates derived from a single regression model that included use of biomass and all of the variables that were significant ( $p < 0.1$ ) in analyses adjusted only for age, but was restricted to women who were long-term users or non-users of biomass

<sup>c</sup>Body mass index (BMI) ( $\text{kg}/\text{m}^2$ )  $\geq 25$  = high; Waist-to-hip ratio (WHR)  $\geq 0.85$  = high.

**Supplementary Table 7.** Associations of definite or probable CHD on ECG with risk factors.

| Risk factor                                                                                                           | Adjusted only for age<br>(n=841) |           | Fully adjusted <sup>a</sup><br>(n=841) |           | Fully adjusted and limited to long-term users and non-users of biomass <sup>b</sup><br>(n=686) |           |
|-----------------------------------------------------------------------------------------------------------------------|----------------------------------|-----------|----------------------------------------|-----------|------------------------------------------------------------------------------------------------|-----------|
|                                                                                                                       | OR                               | (95%CI)   | OR                                     | (95%CI)   | OR                                                                                             | (95%CI)   |
| <b>Age (per 10 year increase)</b>                                                                                     | 1.1                              | (0.9-1.3) | 1.1                                    | (0.9-1.3) | 1.0                                                                                            | (0.8-1.3) |
| <b>Educational status</b>                                                                                             |                                  |           |                                        |           |                                                                                                |           |
| Illiterate                                                                                                            | 1.0                              |           | -                                      |           | -                                                                                              |           |
| Any literacy                                                                                                          | 0.8                              | (0.4-1.7) |                                        |           |                                                                                                |           |
| <b>Household income/month</b>                                                                                         |                                  |           |                                        |           |                                                                                                |           |
| <3000-10000PKR                                                                                                        | 1.0                              |           | 1.0                                    |           | 1.0                                                                                            |           |
| >10000PKR                                                                                                             | 1.6                              | (1.1-2.3) | 1.6                                    | (1.1-2.4) | 1.3                                                                                            | (0.8-2.0) |
| <b>Household ownership</b>                                                                                            |                                  |           |                                        |           |                                                                                                |           |
| Rented                                                                                                                | 1.0                              |           | -                                      |           | -                                                                                              |           |
| Own                                                                                                                   | 1.4                              | (0.7-2.9) |                                        |           |                                                                                                |           |
| <b>Construction of house</b>                                                                                          |                                  |           |                                        |           |                                                                                                |           |
| Katcha/semi-pucca                                                                                                     | 1.0                              |           | -                                      |           | -                                                                                              |           |
| Pucca                                                                                                                 | 1.0                              | (0.7-1.5) |                                        |           |                                                                                                |           |
| <b>Number of household assets</b>                                                                                     |                                  |           |                                        |           |                                                                                                |           |
| 0-1                                                                                                                   | 1.0                              |           | -                                      |           | -                                                                                              |           |
| 2-3                                                                                                                   | 1.0                              | (0.7-1.5) |                                        |           |                                                                                                |           |
| ≥4                                                                                                                    | 1.3                              | (0.8-2.1) |                                        |           |                                                                                                |           |
| <b>Father's occupation in woman's childhood</b>                                                                       |                                  |           |                                        |           |                                                                                                |           |
| Non-manual                                                                                                            | 1.0                              |           | -                                      |           | -                                                                                              |           |
| Manual                                                                                                                | 1.0                              | (0.4-2.3) |                                        |           |                                                                                                |           |
| <b>Birthweight</b>                                                                                                    |                                  |           |                                        |           |                                                                                                |           |
| Lower than normal                                                                                                     | 1.0                              |           |                                        |           | -                                                                                              |           |
| Normal                                                                                                                | 1.1                              | (0.7-1.7) | -                                      |           | -                                                                                              |           |
| Higher than normal                                                                                                    | 1.1                              | (0.7-1.9) |                                        |           |                                                                                                |           |
| <b>Ever hungry during all the time during childhood because there was not enough food</b>                             |                                  |           |                                        |           |                                                                                                |           |
| No                                                                                                                    | 1.0                              |           | -                                      |           | -                                                                                              |           |
| Yes                                                                                                                   | 1.1                              | (0.8-1.6) |                                        |           |                                                                                                |           |
| <b>Lost weight during childhood</b>                                                                                   |                                  |           |                                        |           |                                                                                                |           |
| No                                                                                                                    | 1.0                              |           | -                                      |           | -                                                                                              |           |
| Yes                                                                                                                   | 0.8                              | (0.6-1.2) |                                        |           |                                                                                                |           |
| <b>Ever smoked regularly (any of cigarettes, bidi, huqqa)</b>                                                         |                                  |           |                                        |           |                                                                                                |           |
| Never                                                                                                                 | 1.0                              |           | -                                      |           | -                                                                                              |           |
| Ever                                                                                                                  | 1.0                              | (0.6-1.8) |                                        |           |                                                                                                |           |
| <b>Environmental tobacco smoke (at least one other household member smokes cigarettes, bidi or huqqa in the home)</b> |                                  |           |                                        |           |                                                                                                |           |
| No                                                                                                                    | 1.0                              |           |                                        |           | -                                                                                              |           |
| Yes                                                                                                                   | 0.9                              | (0.6-1.3) | -                                      |           | -                                                                                              |           |
| <b>Consumption of meat or eggs</b>                                                                                    |                                  |           |                                        |           |                                                                                                |           |



|                                                         |     |           |  |
|---------------------------------------------------------|-----|-----------|--|
| Do not eat either meat or eggs as much as once per week | 1.0 |           |  |
| Eat one of meat or eggs as much as once per week        | 0.9 | (0.6-1.4) |  |
| Eat both meat and eggs at least once per week           | 1.2 | (0.7-1.8) |  |

**Current nutrition<sup>c</sup>**

|                          |     |           |   |
|--------------------------|-----|-----------|---|
| Neither BMI nor WHR high | 1.0 |           |   |
| One of BMI or WHR high   | 0.8 | (0.5-1.2) | - |
| Both BMI and WHR high    | 1.1 | (0.7-1.6) |   |

|                                 |     |  |     |
|---------------------------------|-----|--|-----|
| <b>Non-user of biomass user</b> | 1.0 |  | 1.0 |
|---------------------------------|-----|--|-----|

|                        |     |           |               |
|------------------------|-----|-----------|---------------|
| <b>User of biomass</b> | 0.8 | (0.6-1.2) | 0.8 (0.6-1.2) |
|------------------------|-----|-----------|---------------|

|                                     |     |  |     |
|-------------------------------------|-----|--|-----|
| <b>Longterm non-user of biomass</b> | 1.0 |  | 1.0 |
|-------------------------------------|-----|--|-----|

|                                 |     |           |               |
|---------------------------------|-----|-----------|---------------|
| <b>Longterm user of biomass</b> | 0.9 | (0.6-1.3) | 0.9 (0.6-1.3) |
|---------------------------------|-----|-----------|---------------|

<sup>a</sup>ECGs were missing for 9 women or not codable due to poor quality.

<sup>b</sup>Mutually adjusted risk estimates derived from a single regression model that included use of biomass and all of the variables that were significant ( $p < 0.1$ ) in analyses adjusted only for age

<sup>c</sup>Mutually adjusted risk estimates derived from a single regression model that included use of biomass and all of the variables that were significant ( $p < 0.1$ ) in analyses adjusted only for age, but was restricted to women who were long-term users or non-users of biomass

<sup>d</sup>Body mass index (BMI) ( $\text{kg}/\text{m}^2$ )  $\geq 25$  = high; Waist-to-hip ratio (WHR)  $\geq 0.85$  = high.

**STROBE 2007 (v4) Statement—Checklist of items that should be included in reports of *cross-sectional studies***

| Section/Topic                | Item # | Recommendation                                                                                                                                                                       | Reported on page # |
|------------------------------|--------|--------------------------------------------------------------------------------------------------------------------------------------------------------------------------------------|--------------------|
| <b>Title and abstract</b>    | 1      | (a) Indicate the study's design with a commonly used term in the title or the abstract                                                                                               | 1                  |
|                              |        | (b) Provide in the abstract an informative and balanced summary of what was done and what was found                                                                                  | 1                  |
| <b>Introduction</b>          |        |                                                                                                                                                                                      |                    |
| Background/rationale         | 2      | Explain the scientific background and rationale for the investigation being reported                                                                                                 | 2                  |
| Objectives                   | 3      | State specific objectives, including any prespecified hypotheses                                                                                                                     | 2                  |
| <b>Methods</b>               |        |                                                                                                                                                                                      |                    |
| Study design                 | 4      | Present key elements of study design early in the paper                                                                                                                              | 3                  |
| Setting                      | 5      | Describe the setting, locations, and relevant dates, including periods of recruitment, exposure, follow-up, and data collection                                                      | 3                  |
| Participants                 | 6      | (a) Give the eligibility criteria, and the sources and methods of selection of participants                                                                                          | 3                  |
| Variables                    | 7      | Clearly define all outcomes, exposures, predictors, potential confounders, and effect modifiers. Give diagnostic criteria, if applicable                                             | 3-5                |
| Data sources/<br>measurement | 8*     | For each variable of interest, give sources of data and details of methods of assessment (measurement). Describe comparability of assessment methods if there is more than one group | 3-5                |
| Bias                         | 9      | Describe any efforts to address potential sources of bias                                                                                                                            | 3-5                |
| Study size                   | 10     | Explain how the study size was arrived at                                                                                                                                            | 5                  |
| Quantitative variables       | 11     | Explain how quantitative variables were handled in the analyses. If applicable, describe which groupings were chosen and why                                                         | 5                  |
| Statistical methods          | 12     | (a) Describe all statistical methods, including those used to control for confounding                                                                                                | 5                  |
|                              |        | (b) Describe any methods used to examine subgroups and interactions                                                                                                                  | 5                  |
|                              |        | (c) Explain how missing data were addressed                                                                                                                                          | In relevant tables |
|                              |        | (d) If applicable, describe analytical methods taking account of sampling strategy                                                                                                   | N/A                |
|                              |        | (e) Describe any sensitivity analyses                                                                                                                                                | N/A                |
| <b>Results</b>               |        |                                                                                                                                                                                      |                    |

|                          |     |                                                                                                                                                                                                              |                          |
|--------------------------|-----|--------------------------------------------------------------------------------------------------------------------------------------------------------------------------------------------------------------|--------------------------|
| Participants             | 13* | (a) Report numbers of individuals at each stage of study—eg numbers potentially eligible, examined for eligibility, confirmed eligible, included in the study, completing follow-up, and analysed            | 6                        |
|                          |     | (b) Give reasons for non-participation at each stage                                                                                                                                                         | 6                        |
|                          |     | (c) Consider use of a flow diagram                                                                                                                                                                           | Not needed               |
| Descriptive data         | 14* | (a) Give characteristics of study participants (eg demographic, clinical, social) and information on exposures and potential confounders                                                                     | 6 and Tables 1-3         |
|                          |     | (b) Indicate number of participants with missing data for each variable of interest                                                                                                                          | Tables 1-3               |
| Outcome data             | 15* | Report numbers of outcome events or summary measures                                                                                                                                                         | 6                        |
| Main results             | 16  | (a) Give unadjusted estimates and, if applicable, confounder-adjusted estimates and their precision (eg, 95% confidence interval). Make clear which confounders were adjusted for and why they were included | Supplementary Tables 4-7 |
|                          |     | (b) Report category boundaries when continuous variables were categorized                                                                                                                                    | Tables                   |
|                          |     | (c) If relevant, consider translating estimates of relative risk into absolute risk for a meaningful time period                                                                                             | N/A                      |
| Other analyses           | 17  | Report other analyses done—eg analyses of subgroups and interactions, and sensitivity analyses                                                                                                               | N/A                      |
| <b>Discussion</b>        |     |                                                                                                                                                                                                              |                          |
| Key results              | 18  | Summarise key results with reference to study objectives                                                                                                                                                     | 8                        |
| Limitations              | 19  | Discuss limitations of the study, taking into account sources of potential bias or imprecision. Discuss both direction and magnitude of any potential bias                                                   | 8-9                      |
| Interpretation           | 20  | Give a cautious overall interpretation of results considering objectives, limitations, multiplicity of analyses, results from similar studies, and other relevant evidence                                   | 10                       |
| Generalisability         | 21  | Discuss the generalisability (external validity) of the study results                                                                                                                                        | 8                        |
| <b>Other information</b> |     |                                                                                                                                                                                                              |                          |
| Funding                  | 22  | Give the source of funding and the role of the funders for the present study and, if applicable, for the original study on which the present article is based                                                | 2                        |

\*Give information separately for cases and controls in case-control studies and, if applicable, for exposed and unexposed groups in cohort and cross-sectional studies.

**Note:** An Explanation and Elaboration article discusses each checklist item and gives methodological background and published examples of transparent reporting. The STROBE checklist is best used in conjunction with this article (freely available on the Web sites of PLoS Medicine at <http://www.plosmedicine.org/>, Annals of Internal Medicine at <http://www.annals.org/>, and Epidemiology at <http://www.epidem.com/>). Information on the STROBE Initiative is available at [www.strobe-statement.org](http://www.strobe-statement.org).

# BMJ Open

## Coronary Heart Disease, Hypertension and Use of Biomass Fuel among Women: Comparative Cross-sectional Study.

|                                 |                                                                                                                                                                                                                                                                                  |
|---------------------------------|----------------------------------------------------------------------------------------------------------------------------------------------------------------------------------------------------------------------------------------------------------------------------------|
| Journal:                        | <i>BMJ Open</i>                                                                                                                                                                                                                                                                  |
| Manuscript ID                   | bmjopen-2019-030881.R1                                                                                                                                                                                                                                                           |
| Article Type:                   | Research                                                                                                                                                                                                                                                                         |
| Date Submitted by the Author:   | 17-Jun-2019                                                                                                                                                                                                                                                                      |
| Complete List of Authors:       | Fatmi, Zafar; Aga Khan University, Department of Community Health Sciences<br>Ntani, G; University of Southampton and Southampton University Hospitals NHS Trust, MRC Lifecourse Epidemiology Unit<br>Coggon, David; University of Southampton, MRC Lifecourse Epidemiology Unit |
| <b>Primary Subject Heading</b>: | Global health                                                                                                                                                                                                                                                                    |
| Secondary Subject Heading:      | Epidemiology, Occupational and environmental medicine, Public health                                                                                                                                                                                                             |
| Keywords:                       | Coronary heart disease < CARDIOLOGY, biomass fuel, Hypertension < CARDIOLOGY, women, EPIDEMIOLOGY, Public health < INFECTIOUS DISEASES                                                                                                                                           |
|                                 |                                                                                                                                                                                                                                                                                  |

SCHOLARONE™  
Manuscripts

# Coronary Heart Disease, Hypertension and Use of Biomass Fuel among Women: Comparative Cross-sectional Study.

Zafar Fatmi,<sup>1,2</sup> Georgia Ntani,<sup>2</sup> David Coggon<sup>2</sup>

<sup>1</sup>Department of Community Health Sciences, Aga Khan University, PO Box 3500, Karachi 74800, Pakistan.

<sup>2</sup>MRC Lifecourse Epidemiology Unit, University of Southampton, Southampton, UK.

\*Correspondence should be addressed to Zafar Fatmi; [zafar.fatmi@aku.edu](mailto:zafar.fatmi@aku.edu) ;

## Abstract

**Objectives:** To explore the associations of hypertension and coronary heart disease (CHD) with use of biomass fuel for cooking.

**Design:** Comparative cross-sectional study.

**Setting:** Rural villages in Sindh, Pakistan.

**Participants:** Women aged  $\geq 40$  years who had used biomass fuel for cooking for at least the past year (n = 436), and a comparison group (n=414) who had cooked only with non-biomass fuel during the past year were recruited through door-to-door visits. None of those who were invited to take part declined.

**Primary and secondary outcome measures:** Hypertension was determined from blood pressure measurements and use of medication. CHD was assessed by three measures: history of angina (Rose angina questionnaire), previous history of 'heart attack', and definite or probable changes of CHD on electrocardiogram (ECG). Potentially confounding risk factors were ascertained by questionnaire and anthropometry. Associations of hypertension and CHD with use of biomass and other risk factors were assessed by logistic regression, and summarised by odds ratios (ORs) with 95% confidence intervals (CIs).

**Results:** After adjustment for potential confounders, there was no association of hypertension (OR: 1.0, 95% CI 0.8 – 1.4) angina (OR: 1.0, 95% CI 0.8-1.4), heart attack (OR: 1.2, 95% 0.7 – 2.2) or ECG changes of CHD (OR: 0.8, 95% CI 0.6 – 1.2) with current use of biomass for cooking. Nor were any associations apparent when analyses were restricted to long-term ( $\geq 10$  years) users and non-users of biomass fuel.

**Conclusions:** A linked air monitoring study indicated substantially higher airborne concentrations of fine particulate matter in kitchens where biomass was used for cooking. It is possible that associations with CHD and hypertension were missed because most of the comparison group had used biomass for cooking at some time in the past, and risk remains elevated for many years after last exposure.

## Strengths and limitations of this study:

- The study was well-powered with a high response rate (93%) from those invited to take part, and large contrasts in recent exposure to indoor air pollution.

- Comparisons were based on recent cooking practices, but some exposures may have changed since the onset of coronary heart disease.
- Many women who did not currently use biomass for cooking, had done so in the past, and this may have obscured associations with health outcomes if effects of exposure persist long-term.
- Errors may have occurred in the assessment of outcome measures, biasing risk estimates towards the null.
- Recall of some potentially confounding factors may have been inaccurate, leading to uncontrolled residual confounding.

### **Funding Statement**

This research was supported by a fellowship from the Colt Foundation for the conduct of a PhD by Professor Zafar Fatmi. Professor David Coggon and Dr Georgia Ntani were supported by funding from the UK Medical Research Council (MRC\_MC\_UU\_12011/5).

### **Conflicts of Interest**

The authors declare that there is no conflict of interest regarding the publication of this paper.

#### **Authors' contributions**

ZF led the design and conduct of the study, carried out the initial statistical analyses, and wrote the first draft of the manuscript.

GN oversaw and guided the statistical analysis.

DC supervised the project and amended the first draft of the manuscript.

All authors approved the final version of the manuscript.

## Introduction

Much of the world's population still uses biomass fuel (wood, cow-dung, crop residues etc.) in open fires or simple stoves for domestic cooking and heating [1,2]. The household air pollution (HAP) which this generates is a major cause of respiratory infections among children [3-5], chronic obstructive pulmonary disease [6-7] and lung cancer [8-10]. In addition, several studies have suggested a hazard of coronary heart disease (CHD), but evidence for this is more limited [11, 12].

We, therefore, carried out a cross-sectional survey to explore the association between CHD and cooking with biomass in a sample of women drawn from the general population in rural areas of Pakistan. The objective of the study was to compare the prevalence of hypertension, angina, previous history of heart attack, and electrocardiographic (ECG) changes indicative of CHD in women  $\geq 40$  years of age who used biomass fuel for cooking with that in women of similar age who cooked using other types of fuel.

## Materials and Methods

### *Study Setting*

The survey was conducted during 2015 in villages surrounding the main urban area of Nawabshah district (recently renamed as Shaheed Benazirabad) in the province of Sindh, Pakistan. These were selected to give a mix in the fuels used for cooking within the study sample. Some of the villages had been supplied with natural gas for at least 10 years, whereas in others biomass fuel (wood and/or cow dung) was still being used.

### *Recruitment of households and subjects*

Within each village, trained field workers made door-to-door visits, and asked the heads of households whether their families would be willing to assist with the study, and if so, what type of fuel was used for cooking, and whether food preparation was regularly undertaken by a woman  $\geq 40$  years of age. In this way, the study team identified quotas of the required numbers of households in each of the two categories of fuel use (biomass and other). The heads of these households were then asked to complete a consent form, and to identify and introduce the woman of the household aged  $\geq 40$  years who had carried out the most cooking in the house over the past 10 years. The study was explained to her, and she was invited to participate and to give signed consent.

### *Inclusion criteria*

Women aged 40 years or older were eligible for inclusion if they gave informed consent, and had been cooking in the household for at least the past year, using only one of biomass fuel or non-biomass fuel.

### *Questionnaire, examination and measurements*

A standardized questionnaire was used to collect information at interview about: demographic and socio-economic characteristics, birth weight, smoking history, whether another member of the household was a regular smoker, relevant aspects of diet, physical activity, lifetime history of cooking using different types of fuel, any previous diagnosis of a "heart attack" by a doctor, symptoms of angina (through the Rose angina questionnaire [13]), and any current use of medication for hypertension. In addition, measurements were made of height, weight, waist circumference, hip circumference and blood pressure.

1  
2  
3 Socioeconomic status was characterized by the literacy of the participant (no vs. any literacy), the  
4 type of employment of her father during her childhood (manual or non-manual), the ownership and  
5 construction of her house ('pucca' i.e. made of concrete walls and roof or 'katcha/semi-pucca' i.e.  
6 made fully or partially of thatched walls and roof), the income level of the household, and the number  
7 of household assets owned from a list of seven. Birth weight was determined from participants' recall  
8 as being 'higher than normal vs. normal vs. lower than normal'.  
9

10 The questions on smoking covered use of cigarettes, *bidi* (locally made cigarettes without filters) or a  
11 huqqa (pipe) regularly (at least once a week for a month or longer). The number of other people in  
12 the household who smoked provided a measure of domestic exposure to environmental tobacco  
13 smoke (ETS), which was classified according to whether at least one other household member  
14 smoked cigarettes, *bidi*, or a huqqa in the home.  
15  
16

17 Dietary questions covered the use of oil or ghee for cooking and eating, and weekly consumption of  
18 meat and eggs. The former was categorized to three levels: only or mostly use oil; mixed use of oil  
19 and ghee; only or mostly use ghee. Frequencies of consuming meat and eggs were each categorized  
20 to two levels: at least once per week vs. less than once per week.  
21

22 Level of physical activity was assessed through questions on the frequency per week of shopping,  
23 fetching water, washing clothes, collecting wood for cooking, agricultural work on a farm and any  
24 other regular heavy physical work. Each of these activities was categorized to two levels: zero days  
25 per week or at least once per week. A composite physical activity score was then derived as the  
26 number of activities carried out at least once per week, with values ranging from 0 to 6.  
27  
28

29 Height, weight, and waist and hip circumference were measured using a stadiometer, digital weighing  
30 scale and measuring tape, following standardized methods. Body mass index (BMI) (weight in  
31 kilograms per squared height in meters) and waist-to-hip ratio (WHR) were then calculated from the  
32 measurements. BMIs  $\geq 25 \text{ kg/m}^2$  were considered abnormally high (overweight or obese), as were  
33 WHRs  $\geq 0.85$ .  
34

#### 35 *Categories of exposure to biomass:*

36 Use of biomass was classed to two main categories; biomass users who currently used firewood  
37 and/or cow dung for cooking; and non-users of biomass who did not (other sorts of biomass were not  
38 used for cooking in the community studied).  
39  
40

41 In addition, two subsets of these main categories were distinguished: long-term biomass users who  
42 currently used firewood and/or cow dung for cooking and had done so for at least the past 10 years;  
43 and long-term non-users of biomass who currently did not use either firewood or cow dung for  
44 cooking and had not done so for at least 10 years.  
45  
46

#### 47 *Outcome measures:*

48 Four outcome measures were specified.  
49

50 Hypertension: Three measurements of blood pressure were made at five-minute intervals, using an  
51 Omron upper arm blood pressure monitor, and mean values for systolic and diastolic blood pressure  
52 were derived. Women were deemed to have hypertension if they met at least one of three criteria:  
53 mean systolic blood pressure  $\geq 140$  mm Hg; mean diastolic blood pressure  $\geq 90$  mm Hg; regular use of  
54 medication for blood pressure.  
55  
56

57 Angina: Experience of angina was assessed through the WHO's Rose angina questionnaire [13],  
58 which comprises seven questions relating to chest pain, its anatomical distribution, precipitating and  
59 relieving factors, and duration. A diagnosis of angina required report of pain, pressure or discomfort  
60



1  
2  
3 in the chest centrally, or in both the left anterior chest and left arm, that occurred when walking uphill  
4 or hurrying, that caused the participant to stop or slow down when it occurred while walking, and that  
5 was then relieved within 10 minutes by standing still.  
6

7 Heart attack: Previous diagnosis of “heart attack” by a doctor was ascertained through a single  
8 question: “In the past, have you ever been told by a health care provider that you had a ‘heart  
9 attack’?”  
10

11 Definite or probable CHD on ECG: A 12-lead ECG was recorded according to a standard protocol,  
12 and coded for the presence of definite or probable CHD, using the Minnesota Code Manual of  
13 Electrocardiographic Findings, second edition [14]. This corresponded to the presence of any of  
14 codes 1-1 to 1-3, 3-1, 4-1 to 4-4, 5-1 to 5-3, 7-1-1 and 9-2. In order to check the repeatability of the  
15 coding, two of us (ZF and DC) coded all of the ECGs independently. We used the same scanned ECG  
16 traces, without information about the type of cooking fuel used by the participant. Levels of  
17 agreement between the observers were assessed, using kappa statistics. Where differences occurred in  
18 the classification of an ECG trace, they were then resolved by discussion between the two observers.  
19  
20

### 21 *Statistical analysis*

22 Data were double-entered in Epidata 3.1 software [15] for validation. All discrepancies were  
23 corrected by reference to the original questionnaire or record sheet. Statistical analysis was carried out  
24 with Stata version 12.0 [16].  
25  
26

27 As a first step, several variables were reclassified or combined, based on their distribution in the full  
28 study sample, and without knowledge of participants’ use of biomass fuel. Thus, a combined index  
29 was derived for frequency of consuming meat and eggs with three levels: neither meat nor eggs as  
30 much as once per week; one of meat or eggs at least once per week; both meat and eggs at least once  
31 per week. Scores for physical activity were categorized into three levels: low (0-1 activities); medium  
32 (2-3); high (4 or more). Similarly, BMI and WHR were combined as a single variable with three  
33 categories: neither BMI nor WHR high; one of BMI or WHR high; both BMI and WHR high.  
34  
35

36 Descriptive statistics were produced for women in each of the four categories of exposure to biomass,  
37 summarizing their demographic and socioeconomic characteristics, current and past cooking  
38 arrangements, types and durations of fuel use, hours of cooking per day, types of stove and kitchen,  
39 and exposures to potentially confounding risk factors. The prevalence of the main outcomes was  
40 determined for the study sample overall, and the relationship of ECG changes to angina and history of  
41 heart attack was explored.  
42  
43

44 Logistic regression analysis was then used to assess the association of each of the four outcome  
45 variables with use of biomass fuel for cooking and other possible risk factors. First, associations with  
46 each potential risk factor were determined after adjustment for age. The main exposure of interest  
47 (user or non-user of biomass) was then carried forward into a mutually adjusted model along with all  
48 other risk factors which showed associations ( $p \leq 0.1$ ) when examined individually. In addition, a  
49 second mutually adjusted model was fitted that compared long-term use and non-use of biomass for  
50 cooking.  
51

### 52 *Sample size*

53 The size of the study sample was determined by a power calculation which assumed an outcome  
54 prevalence of at least 6% for definite CHD among non-users of biomass fuel, based on a previous  
55 study in Pakistan [17] (the prevalence of other outcomes was expected to be higher). This indicated  
56 that we would require at least 876 women (438 users and 438 non-users of biomass) for 80% power to  
57 detect an odds ratio of 2.0 for the use of biomass fuel with a 5% level of statistical significance.  
58  
59  
60

### *Patient and public involvement*

There was no involvement of patients or the public in development of this study.

### *Ethical approval*

The study was approved by Ethics Review Committee of Aga Khan University, Karachi, Pakistan.

## **Results**

A total of 24 villages were visited in order to recruit the number of households required for the survey. In 14 villages all households used biomass for cooking, in three, all used natural gas, and in the other seven, both types of fuel were used. The number of participating households per village ranged from as few as three to as many as 210. Interviews were completed with women from a total of 1073 households, 536 of which currently used biomass fuel, and 537 natural gas (including LPG). No-one declined to participate in the study, but 77 women could not be interviewed because they were not at home at the time when the survey team visited (mostly because they were engaged in agricultural work).

Among the 1073 women who completed interviews, 44 indicated that they were in fact aged less than 40 years of age, and were therefore excluded from the analysis. An additional 151 women had not made meals regularly (at least one meal per day on most days of the week) during the past year, and were also excluded. We further excluded 28 women who did not currently use firewood or cow dung for cooking, but whose time since last use of biomass was <2 years (this was done to ensure distinct exposure categories). Thus, further analysis was based on 850 women: 436 users and 414 non-users of biomass. Among them, 430 were long-term users of biomass users, and 263 were long-term non- users.

Table 1 summarizes the demographic and socioeconomic characteristics of the participants in the study sample overall, and according to categories of exposure to biomass fuel. In comparison with users of biomass, non-users were marginally younger (63% versus 60% <50 years), and somewhat more advantaged socioeconomically.

Table 2 describes the current and past cooking arrangements of participants, including type and duration of fuel use, intensity of cooking, and type of stove and kitchen. Even among the long-term non-users of biomass, 88% had cooked with biomass fuels at some time in their life. Among the biomass users, the large majority had used wood (93%) and cow dung (88%) for longer than 20 years. Few participants (3.7% of biomass users and 6.3% of non-users) had ever used kerosene as a cooking fuel. Most participants (approximately 60%) currently cooked for 2-3 hours per day, the average duration of cooking per day being similar in users and non-users of biomass. Where biomass was used for cooking, it was also more likely to be used to heat the home.

Table 3 shows the distribution of potentially confounding risk factors for CHD in the four categories of exposure to biomass. In comparison with non-users of biomass users, slightly higher proportions of women using biomass reported having been born with 'lower than normal' birth weight, having lost weight at some time during childhood, ever having smoked, and being exposed to environmental tobacco smoke in the home.

### *Prevalence of outcome measures*

Supplementary Table 1 shows the prevalence of the main outcome measures that were investigated. In total, 297 women (35%) were classed as having hypertension, two thirds of whom were taking regular medication for blood pressure. About 27% had symptoms indicative of angina based on Rose's

questionnaire. Fifty-four (6.4%) reported a previous history of heart attack, and 19% of women had findings of definite or probable CHD on ECG.

*Validity of ECG classification and interrelationships of outcome measures:*

Supplementary Table 2 compares the classification of ECGs by the two observers. Satisfactory ECG traces were obtained for 841 (98.9%) of the participants, but four were missing from the file used to assess inter-observer agreement, and were later assessed jointly by the two observers. The overall agreement between the two observers was 85.2% ( $\kappa = 0.57$ ). Most disagreements were related to cases in which the exceedance of a threshold in, for example, ST elevation, ST depression or the width (duration) of a Q wave was borderline. In some cases, it was questionable whether there was a small R wave or a QS pattern. Also, there was some disagreement about whether T waves were negative or flat. Following discussion between the two observers, all of the discrepancies were reconciled, and it was finally agreed that 181 women (21.5%) showed changes indicative of definite or probable CHD. However, in 22 of these cases, it appeared that the abnormality had occurred only because the ECG leads had been placed incorrectly, and those traces were reclassified as normal. Thus in further analyses, 159 (19%) of women were considered to have definite or probable CHD on ECG.

Supplementary Table 3 shows the prevalence of definite or probable CHD on ECG according to symptoms of angina and history of heart attack. It was somewhat more frequent in participants who reported an earlier heart attack (26%) than in those who did not and had no symptoms of angina (18%). However, there was no association with angina in the absence of heart attack.

*Association of outcome measures with use of biomass and other risk factors*

Associations of hypertension and the three CHD outcomes (angina, heart attack and definite or probable CHD on ECG) with potential risk factors are presented in Supplementary Tables 4 to 7, from which the risk estimates for use of biomass fuel for cooking are summarized in Table 4. The first column of each table gives odds ratios adjusted only for age, while the second column presents mutually adjusted risk estimates from a single model that included use of biomass and all of the risk factors that showed associations ( $p \leq 0.1$ ) in the analyses adjusted only for age. The last column shows findings from a similar analysis but restricted to women who were long-term users or non-users of biomass.

In analyses that adjusted only for age, hypertension was associated ( $p \leq 0.1$ ) with older age, a higher number of household assets, higher frequency of consuming meat and eggs, and having a high BMI or WHR (Supplementary Table 4). When these variables were carried forward to the mutually adjusted analysis, the association with consumption of meat and eggs was diminished, but the others remained. Thus, the risk of hypertension increased 40% with every 10-year increase in age, was 2.3 times higher in women with  $\geq 4$  household assets than in those with 0 or 1, and was increased 1.9-fold in women who had both high BMI and high WHR as compared with those in whom neither BMI nor WHR were elevated. However, hypertension was not associated with use of biomass (OR 1.0 in the fully adjusted model). When analysis was restricted to long-term users and non-users of biomass, results were similar, with an OR of 1.1 for long-term use of biomass.

In analyses that adjusted only for age, the odds of angina increased with age and regular smoking, and were significantly lower with more frequent consumption of meat and eggs (Supplementary Table 5). Moreover, this pattern was maintained when risk estimates were mutually adjusted. Thus, the odds of angina increased by 30% per 10-year increase in age, and with ever having smoked regularly (OR 2.0, 95%CI 1.2-3.2), and were significantly lower in women who ate both meat and eggs at least once per week (OR 0.5, 95%CI 0.3-0.7). There was, however, no association with use of biomass (OR 1.0, 95%CI 0.8-1.4). When analysis was restricted to long-term users and non-users of biomass, results were similar except that there was a suggestion of a weak association with exposure to biomass (OR 1.3, 95%CI 0.9-1.9).

1  
2  
3 In corresponding analyses with previous history of heart attack (diagnosed by a physician) as an  
4 outcome, initial models with adjustment only for age indicated associations ( $p < 0.1$ ) with age, higher  
5 household income, higher number of household assets, and high BMI or WHR (Supplementary Table  
6 6). After mutual adjustment, age remained a significant risk factor (OR 1.5, 95%CI 1.2-2.0, for each  
7 10-year increase in age). However, the other associations, although still positive, were not significant  
8 at a 5% level. Nor was there an association with use of biomass for cooking (OR 1.2, 95%CI 0.7-2.2).  
9 In the mutually adjusted model for long-term use of biomass, results were very similar.  
10

11 In analyses adjusted only for age, household income was the only variable significantly associated  
12 with definite or probable CHD on ECG, and it remained significant in the fully adjusted model (OR  
13 1.6, 95%CI 1.1-2.4 for household income  $> 10,000$ PKR) (Supplementary Table 7). However, there  
14 was no association with use of biomass for cooking, either overall or in the long-term (ORs 0.8 and  
15 0.9).  
16

## 17 Discussion

18  
19  
20  
21 This study found no association between use of biomass fuel and any of the four outcomes studied  
22 (hypertension, angina, previous history of heart attack, and definite or probable CHD on ECG), even  
23 when comparison was with women who had not used biomass for at least the last 10 years. The  
24 strongest hint of an association was for angina in long-term users as compared with long-term non-  
25 users of biomass, but the elevation of risk was small (30%) and not statistically significant at a 5%  
26 level.  
27

28 The choice of villages from which to recruit participants ensured a balance in the fuels currently used  
29 for cooking, and cooperation in the survey was good with high response rates from the households  
30 and women that were invited to take part. Inevitably, recruitment was to some extent opportunistic  
31 and limited to one province of Pakistan. However, there seems no reason to expect that the study  
32 sample would have been seriously unrepresentative in the associations of hypertension and CHD with  
33 use of biomass and other risk factors.  
34

35  
36 A linked air monitoring study found that in the kitchens of houses using biomass for cooking, the  
37 mean 24-hour average  $PM_{2.5}$  concentration was  $531 \mu\text{g}/\text{m}^3$ , with a median of  $136 \mu\text{g}/\text{m}^3$  and inter-  
38 quartile range  $34\text{-}615 \mu\text{g}/\text{m}^3$  (paper in preparation). Corresponding concentrations in houses not using  
39 biomass for cooking were  $69.9, 24.2,$  and  $13.5\text{-}53.3 \mu\text{g}/\text{m}^3$ . Thus, while individual exposures may  
40 have been influenced also by time spent cooking and whether biomass was burned in a closed or open  
41 kitchen, the absence of associations with CHD and hypertension is unlikely to reflect inadequate  
42 contrasts in recent intensity of exposure.  
43

44 Our aim was as far as possible to recruit households that had used the same fuel for cooking  
45 exclusively for at least 10 years. Villages were selected with this criterion in mind, and it was covered  
46 in preliminary inquiries that were addressed to local community representatives. In practice, however,  
47 it turned out that where natural gas was available in villages, some participants had not yet switched  
48 to cleaner fuel, or had done so at a later date than others. A pragmatic decision was therefore made to  
49 include women even if they had changed their cooking fuel within the past 10 years, provided that  
50 they had used their current fuel for at least a year. This seemed reasonable since trials had suggested  
51 that interventions to reduce household air pollution from use of biomass for cooking can produce  
52 reductions in blood pressure and changes in ECGs over the short to medium term [18-20]. However,  
53 to check that it did not obscure associations, additional analyses were carried out with restriction to  
54 long-term users and non-users of biomass, and still no relationship was found with the health  
55 outcomes.  
56

57  
58 The sample size achieved for the study was close to that planned, and the prevalence of the four  
59 outcomes was higher than had been assumed in the power calculations. Moreover, the upper  
60

1  
2  
3 confidence limits for the odds ratios relating to use of biomass were almost all  $<2$ . Thus, the absence  
4 of associations with biomass does not reflect a lack of statistical power.  
5

6 Ascertainment of current use of biomass is likely to have been highly accurate, and while there may  
7 have been some errors in recall of the times when biomass had been used in the past, it is difficult to  
8 conceive that any resultant misclassification would have obscured important associations with CHD.  
9 Generally, switches in the use of fuel were only in one direction – towards cleaner natural gas from  
10 biomass. The timing of changes was usually well recalled because in most instances the entire village  
11 received the new source of fuel in a particular year. However, the duration of using cow dung and  
12 firewood may not always have been remembered reliably, and switches between these types of fuel  
13 could also have occurred. Many women reported using cow dung and firewood for the same duration,  
14 and no attempt was made to analyse them separately.  
15

16 Recall of some potentially confounding exposures may also have been inaccurate – particularly those  
17 pertaining to childhood. If so, the errors would be expected to be non-differential with respect to  
18 CHD, and therefore to bias risk estimates towards the null, possibly leading to uncontrolled residual  
19 confounding. However, the assessment of BMI and WHR used standardized methods, and should  
20 have been reasonably reliable. The interviewers were trained in how to make the measurements, and  
21 their technique was piloted in the field before the start of data collection.  
22  
23

24 A greater concern is the possibility of error in the ascertainment of outcomes. Blood pressure was  
25 objectively measured according to a standardized protocol, and was taken as the average of three  
26 readings. Moreover, most of the women who were classed as having hypertension were taking  
27 treatment for the disorder, which supports the validity of its assessment. Angina was determined  
28 through the well-established Rose questionnaire, but it is possible that symptoms in some cases arose  
29 from other pathology. Previous research has suggested that the Rose angina questionnaire may not be  
30 as reliable among women as in men [21]. Although the question to participants about history of heart  
31 attack referred specifically to diagnoses that had been given by a health professional, errors could  
32 have occurred in interpretation of the term “heart attack” (e.g. to include symptoms from  
33 dysrhythmias and acute heart failure as well as myocardial infarction). However, ascertainment of  
34 heart attack had been previously carried out by the same method in a similar population, where it was  
35 found to be reasonably accurate [22].  
36  
37

38 The diagnosis of CHD from ECGs showed only a weak relationship to history of medically diagnosed  
39 heart attack, and none at all to symptoms of angina (Supplementary Table 3). Between observer  
40 agreement in the classification of ECGs was reasonably good ( $\kappa = 0.57$ ) (Supplementary Table  
41 2), but it is notable that unlike angina and history of heart attack, CHD diagnosed from ECGs did not  
42 show the expected association with age (Supplementary Table 7).  
43

44 To the extent that errors did occur in the ascertainment of outcomes, they are unlikely to have differed  
45 systematically in relation to use of biomass, and therefore would be expected to tend to obscure any  
46 true associations.  
47

48 Because the study had a cross-sectional design, consideration must be given to the possibility of  
49 reverse causation. For risk factors related to childhood (e.g. birthweight, father’s occupation and  
50 education), this is less of a concern. However, it is plausible that characteristics such as diet, physical  
51 activity and time spent cooking could have changed as a consequence of CHD. Depending on the  
52 circumstances, this might bias associations either upwards or downwards.  
53

54 Another limitation of the study was that it did not determine when past heart attacks had occurred.  
55 Even if not as a consequence of an earlier heart attack, some of the exposures studied (e.g. BMI and  
56 WHR) may have changed in the interval since such an attack occurred. If so, this might obscure true  
57 associations.  
58  
59  
60



1  
2  
3 A further possible source of error was uncontrolled residual confounding. To minimize this problem,  
4 information was collected about a range of potentially confounding variables, and as in most studies  
5 of biomass fuel, socio-economic status tended to be higher in women using cleaner fuels [23].  
6 Although several socio-economic indicators were evaluated as possible factors for adjustment,  
7 residual confounding could still have occurred. To explain the absence of associations with biomass,  
8 such confounding would have to be inverse (i.e. the under-ascertained confounder would have to be  
9 less prevalent in women who used biomass than in non-users).  
10

11 The study found expected associations with several established risk factors for CHD. Thus, the odds  
12 of hypertension, angina and previous history of heart attack were all higher with older age (by 30-  
13 50% for every 10 year increase), although this was not found for definite or probable CHD on ECG.  
14 The relationship of CHD to age is well documented in the literature [24], and in women, the incidence  
15 of CHD increases rapidly after the menopause, reaching up to three times that in premenopausal  
16 women [25].  
17

18  
19 Two of the outcome measures – hypertension and previous history of heart attack – were significantly  
20 associated with affluence as measured by number of household assets. This relationship has also been  
21 observed before. In a population-based study in Pakistan, history of ‘angina or heart attack’ was  
22 estimated to have 3-fold higher prevalence among affluent participants than in those who were poor  
23 [26]. The direction of the association, which is the inverse of that observed in western populations,  
24 accords with a higher prevalence of diabetes, hypertension and dyslipidaemias in more educated and  
25 affluent groups, which was found in a recent study conducted in South Asian countries, including  
26 Pakistan [27].  
27

28  
29 In further support of an effect of affluence, we found that high BMI and/or WHR was associated with  
30 greater risk of hypertension, and (non-significantly) with history of heart attack. Obesity has been  
31 shown to increase the risk of hypertension in several studies [28, 29], and partly through this  
32 mechanism, also increases the risk and progression of CHD [30]. The INTERHEART study suggested  
33 that WHR (abdominal obesity) is a better marker of risk for CHD than BMI [31], but the two were  
34 correlated in our study sample, and we opted to use a combined measure.  
35

36 In contrast, we found that more frequent consumption of meat and eggs was associated with reduced  
37 risk of angina. This was unexpected given the known relationship of CHD to consumption of  
38 saturated fat [32], and may have been a chance finding. It did not extend to the other outcomes  
39 investigated. However, a recent large review suggests that the relationship may be inconsistent [33].  
40

41 Smoking has consistently been found to increase the risk of CHD in many studies [34]. However, in  
42 our investigation it was associated only with angina. This might be because intensity of tobacco use  
43 among female smokers in the Pakistani population is low [35].  
44

45 Despite the finding of several expected associations, the failure to demonstrate more consistent  
46 relationships to known risk factors is a further indication for caution in the interpretation of our  
47 results.  
48

49 Several earlier studies have indicated links between use of biomass for cooking and CHD, although  
50 the finding has not been entirely consistent [11,12]. As already discussed, one explanation for our  
51 failure to demonstrate such associations in the current study could be inaccuracies in the diagnosis of  
52 CHD. Another possibility, however, is that adverse effects of exposure to pollutants from the use of  
53 biomass persist many years after last exposure. In this survey, even among women who had not used  
54 biomass during the last 10 years, most had done so earlier, and often for a long time. Only a few  
55 participants (about 3.5% overall) had never used biomass, which was too few for meaningful risk  
56 estimates. While it would be possible to compare rural users of biomass with lifelong users of cleaner  
57 fuels in urban settings, interpretation would be complicated by other important differences between  
58 those living in rural and urban areas.  
59  
60

## Conclusions

This study evaluated the association of hypertension and three measures of CHD – angina, previous history of heart attack and definite or probable CHD on ECG - with use of biomass for cooking. We found no clear associations with any of the health outcomes. However, the weak relationship of ECG abnormalities to the other two measures of CHD, and the inconsistency of their associations with well-established risk factors, suggest that this could have been because of diagnostic misclassification. Alternatively, it could be that an effect was missed because most of the women who were not currently using biomass for cooking had used it in the past, and risk remains elevated for many years after last exposure.

## Data Availability

The data [stata.dta format] underpinning the findings of this study are available from the corresponding author upon reasonable request.

## Acknowledgments

This study reported in this paper formed part of a PhD project carried out by Dr Zafar Fatmi under the supervision of Professor David Coggon at the University of Southampton.

Mr Syed Nayab Ali Shah coordinated the data collection. Ms Shereen Jamali, Ms Fozia Jamali, Ms Iqra Memon and Ms Sana Memon administered the questionnaires at interview and recorded the ECGs. We are grateful also to Professor Keith Palmer and Professor M. Masood Kadir for their advice on various aspects of the study.



## References

1. Bonjour S, Adair-Rohani H, Wolf J, Bruce NG, Mehta S, Prüss-Ustün A, Lahiff M, Rehfuess EA, Mishra V, Smith KR. Solid fuel use for household cooking: country and regional estimates for 1980-2010. *Environ Health Perspect*. 2013;121:784-90.
2. World Health Organization. Household air pollution and health. Geneva, Switzerland. (Accessed on 4 April 2018). <http://www.who.int/mediacentre/factsheets/fs292/en/>
3. Smith KR, Samet JM, Romieu I, Bruce N. Indoor air pollution in developing countries and acute lower respiratory infections in children. *Thorax*. 2000 Jun;55(6):518-32.
4. Smith KR, Mehta S, Maeusezahl-Feuz M. Indoor air pollution from household use of solid fuels: comparative quantification of health risks. In: Ezzati MLA, Rodgers A, Murray CJL, editors. Global and regional burden of disease attributable to selected major risk factors. Geneva, Switzerland: World Health Organization; 2004. pp. 1435–1493.
5. Torres-Duque C, Maldonado D, Pérez-Padilla R, Ezzati M, Viegi G; Forum of International Respiratory Studies (FIRS) Task Force on Health Effects of Biomass Exposure. Biomass fuels and respiratory diseases: a review of the evidence. *Proc Am Thorac Soc*. 2008 Jul 15;5(5):577-90.
6. Liu Y, Lee K, Perez-Padilla R, Hudson NL, Mannino DM. Outdoor and indoor air pollution and COPD-related diseases in high- and low-income countries. *Int J Tuberc Lung Dis*. 2008;12(2):115-27.
7. Kurmi OP, Semple S, Simkhada P, Smith WC, Ayres JG. COPD and chronic bronchitis risk of indoor air pollution from solid fuel: a systematic review and meta-analysis. *Thorax*. 2010; 65(3):221-8.
8. Liu Q, Sasco AJ, Riboli E et al. Indoor air pollution and lung cancer in Guangzhou, People's Republic of China. *Am. J. Epidemiol*. 1993; 137: 145–54.
9. Kleinerman R, Wang Z, Lubin J, Zhang S, Metayer C, Brenner A. Lung cancer and indoor air pollution in rural china. *Ann Epidemiol*. 2000;10(7):469.
10. Behera D, Balamugesh T. Indoor air pollution as a risk factor for lung cancer in women. *J Assoc Physicians India*. 2005; 53:190-2.
11. Fatmi Z, Coggon D. Coronary heart disease and household air pollution from use of solid fuel: a systematic review. *Br Med Bull*. 2016 Jun;118(1):91-109.
12. Yu K, Qui G, Chan K-H, Lam K-BH, Kurmi OP, Bennett DA et al. Association of solid fuel use with risk of cardiovascular and all-cause mortality in rural China. *JAMA* 2018;319:1351-61.
13. Rose G, McCartney P, Reid DD. Self-administration of a questionnaire on chest pain and intermittent claudication. *Br J Prev Soc Med*. 1977; 31:42–48.
14. Prineas RJ, Crow RS, Zhang Z-h. The Minnesota code manual of electrocardiographic findings. 2<sup>nd</sup> Edition. London. Springer London; 2010.
15. Christiansen TB and Lauritsen JM. (Ed.) EpiData - Comprehensive Data Management and Basic Statistical Analysis System. Odense Denmark, EpiData Association, 2010-. <http://www.epidata.dk>
16. Stata Corp LP 2012, Stata Statistical Software: Release 12.0, College Station TX, USA.
17. Jafar TH, Qadri Z, Chaturvedi N. Coronary artery disease epidemic in Pakistan: more electrocardiographic evidence of ischaemia in women than in men. *Heart*. 2008;94(4):408-13.
18. McCracken J, Smith KR, Stone P, Diaz A, Arana B, Schwartz J. Intervention to lower household wood smoke exposure in Guatemala reduces ST-segment depression on electrocardiograms. *Environ Health Perspect* 2011;119:1562-8.
19. McCracken JP, Smith KR, Díaz A, Mittleman MA, Schwartz J. Chimney stove intervention to reduce long-term wood smoke exposure lowers blood pressure among Guatemalan women. *Environ Health Perspect* 2007;115:996-1001.
20. Alexander D, Larson T, Bolton S, Vedal S. Systolic blood pressure changes in indigenous Bolivian women associated with an improved cookstove intervention. *Air Qual Atmos Health* 2015;8:47-53.

- 1
  - 2
  - 3
  - 4
  - 5
  - 6
  - 7
  - 8
  - 9
  - 10
  - 11
  - 12
  - 13
  - 14
  - 15
  - 16
  - 17
  - 18
  - 19
  - 20
  - 21
  - 22
  - 23
  - 24
  - 25
  - 26
  - 27
  - 28
  - 29
  - 30
  - 31
  - 32
  - 33
  - 34
  - 35
  - 36
  - 37
  - 38
  - 39
  - 40
  - 41
  - 42
  - 43
  - 44
  - 45
  - 46
  - 47
  - 48
  - 49
  - 50
  - 51
  - 52
  - 53
  - 54
  - 55
  - 56
  - 57
  - 58
  - 59
  - 60
21. Wilcosky T, Harris R, Weissfeld L. The prevalence and correlates of Rose questionnaire angina among women and men in the Lipid Research Clinics Program Prevalence Study. *Am J Epidemiol.* 1987;125 (3):400-409.
  22. Jafar TH, Jafary FH, Jessani S, Chaturvedi N. Heart disease epidemic in Pakistan: women and men at equal risk. *Am Heart J.* 2005;150(2):221-6.
  23. Khushk WA, Fatmi Z, White F, Kadir MM. Health and social impacts of improved stoves on rural women: a pilot intervention in Sindh, Pakistan. *Indoor Air.* 2005 Oct;15(5):311-6.
  24. Castelli WP. Epidemiology of coronary heart disease: The Framingham study. *American Journal of Medicine* 1984, page 4.
  25. Gordon T, Kannel WB, Hjortland MC, McNamara PM. Menopause and coronary heart disease. The Framingham Study. *Ann Intern Med.* 1978; 89:157–61.
  26. Hameed K, Kadir M, Gibson T, Sultana S, Fatima Z, Syed A. The frequency of known diabetes, hypertension and ischaemic heart disease in affluent and poor urban populations of Karachi, Pakistan. *Diabet Med.* 1995;12(6):500-3.
  27. Ali MK, Bhaskarapillai B, Shivashankar R, Mohan D, Fatmi Z, Pradeepa R, Masood Kadir M, Mohan V, Tandon N, Narayan KM, Prabhakaran D; CARRS investigators. Socioeconomic status and cardiovascular risk in urban South Asia: The CARRS Study. *Eur J Prev Cardiol.* 2016 Mar;23(4):408-19.
  28. Hubert HB, Feinleib M, McNamara PM, Castelli WP. Obesity as an independent risk factor for cardiovascular disease: a 26-year follow-up of participants in the Framingham Heart Study. *Circulation* 1983; 67:968–77.
  29. Todd Miller M, Lavie CJ, White CJ. Impact of obesity on the pathogenesis and prognosis of coronary heart disease. *J Cardiometab Syndrome* 2008; 3:162–7.
  30. Prospective Studies Collaboration. Age-specific relevance of usual blood pressure to vascular mortality: a meta-analysis of individual data for one million adults in 61 prospective studies. *Lancet.* 2002;360: 1903-13.
  31. Yusuf S, Hawken S, Ounpuu S, Bautista L, Franzosi MG, Commerford P, Lang CC, Rumboldt Z, Onen CL, Lisheng L, Tanomsup S, Wangai P Jr, Razak F, Sharma AM, Anand SS; INTERHEART Study Investigators. Obesity and the risk of myocardial infarction in 27,000 participants from 52 countries: a case-control study. *Lancet* 2005;366(9497):1640-9.
  32. The World Health Report 2002: reducing risks, promoting healthy life. Geneva, World Health Organization, 2002.
  33. Chowdhury R, Warnakula S, Kunutsor S, Crowe F, Ward HA, Johnson L, Franco OH, Butterworth AS, Forouhi NG, Thompson SG, Khaw KT, Mozaffarian D, Danesh J, Di Angelantonio E. Association of dietary, circulating, and supplement fatty acids with coronary risk: a systematic review and meta-analysis. *Ann Intern Med.* 2014 Mar 18;160(6):398-406. doi: 10.7326/M13-1788.
  34. Huxley RR, Woodward, M. Cigarette smoking as a risk factor for coronary heart disease in women compared with men: a systematic review and meta-analysis of prospective cohort studies. *Lancet.* 2011;378(9799):1297-305.
  35. Global Adult Tobacco Survey. Pakistan Fact sheet 2014. <http://www.who.int/tobacco/surveillance/survey/gats/pakfactsheet.pdf>

**Table 1.** Demographic and socioeconomic characteristics of participants by exposure category.

| Characteristic                          | All women (n=850) |        | Users of biomass (n=436) |        | Non-users of biomass (n=414) |        | Long-term users of biomass (n=430) |        | Long-term non-users of biomass (n=263) |        |
|-----------------------------------------|-------------------|--------|--------------------------|--------|------------------------------|--------|------------------------------------|--------|----------------------------------------|--------|
|                                         | <i>N</i>          | (%)    | <i>n</i>                 | (%)    | <i>n</i>                     | (%)    | <i>n</i>                           | (%)    | <i>n</i>                               | (%)    |
| <b>Age (years)</b>                      |                   |        |                          |        |                              |        |                                    |        |                                        |        |
| <50                                     | 525               | (61.8) | 263                      | (60.3) | 262                          | (63.3) | 257                                | (59.8) | 166                                    | (63.1) |
| ≥50                                     | 325               | (38.2) | 173                      | (39.7) | 152                          | (36.7) | 173                                | (40.2) | 97                                     | (36.9) |
| <b>Educational status</b>               |                   |        |                          |        |                              |        |                                    |        |                                        |        |
| No literacy                             | 797               | (93.8) | 419                      | (96.1) | 378                          | (91.3) | 413                                | (96.1) | 239                                    | (90.9) |
| Any literacy                            | 53                | (6.2)  | 17                       | (3.9)  | 36                           | (8.7)  | 17                                 | (4.0)  | 24                                     | (9.1)  |
| <b>Household income/month</b>           |                   |        |                          |        |                              |        |                                    |        |                                        |        |
| ≤10000PKR                               | 651               | (76.6) | 351                      | (80.5) | 300                          | (72.5) | 347                                | (80.7) | 185                                    | (70.3) |
| >10000PKR                               | 199               | (23.4) | 85                       | (19.5) | 114                          | (27.5) | 83                                 | (19.3) | 78                                     | (29.7) |
| <b>Household tenure</b>                 |                   |        |                          |        |                              |        |                                    |        |                                        |        |
| Rented                                  | 70                | (8.2)  | 25                       | (5.7)  | 45                           | (10.9) | 25                                 | (5.8)  | 20                                     | (7.6)  |
| Owned                                   | 780               | (91.8) | 411                      | (94.3) | 369                          | (89.1) | 405                                | (94.2) | 243                                    | (92.4) |
| <b>Construction of house</b>            |                   |        |                          |        |                              |        |                                    |        |                                        |        |
| Katcha/ semi-pucca                      | 652               | (76.7) | 361                      | (82.8) | 291                          | (70.3) | 356                                | (82.8) | 173                                    | (65.8) |
| Pucca                                   | 198               | (23.3) | 75                       | (17.2) | 123                          | (29.7) | 74                                 | (17.2) | 90                                     | (34.2) |
| <b>Number of household assets</b>       |                   |        |                          |        |                              |        |                                    |        |                                        |        |
| Low (0-1)                               | 268               | (31.5) | 140                      | (32.1) | 128                          | (30.9) | 139                                | (32.3) | 84                                     | (31.9) |
| Medium (2-3)                            | 404               | (47.5) | 223                      | (51.2) | 181                          | (43.7) | 218                                | (50.7) | 108                                    | (41.1) |
| High (≥4)                               | 178               | (21.0) | 73                       | (16.7) | 105                          | (25.4) | 73                                 | (17.0) | 71                                     | (27.0) |
| <b>Father's occupation in childhood</b> |                   |        |                          |        |                              |        |                                    |        |                                        |        |
| Non-manual                              | 39                | (4.6)  | 19                       | (4.4)  | 20                           | (4.8)  | 18                                 | (4.2)  | 16                                     | (6.1)  |
| Manual                                  | 811               | (95.4) | 417                      | (95.6) | 394                          | (95.2) | 412                                | (95.8) | 247                                    | (93.9) |

**Table 2.** Current and past cooking arrangements according to exposure category.

| Characteristic                                            | Users of biomass<br>(n=436) |        | Non-users of<br>biomass<br>(n=414) |        | Long-term users<br>of biomass<br>(n=430) |        | Long-term non-users<br>of biomass<br>(n=263) |        |
|-----------------------------------------------------------|-----------------------------|--------|------------------------------------|--------|------------------------------------------|--------|----------------------------------------------|--------|
|                                                           | n                           | (%)    | n                                  | (%)    | n                                        | (%)    | n                                            | (%)    |
| <b><i>Ever used biomass for cooking</i></b>               | 436                         | (100)  | 382                                | (92.3) | 430                                      | (100)  | 231                                          | (87.8) |
| <b><i>Years since last used biomass for cooking</i></b>   |                             |        |                                    |        |                                          |        |                                              |        |
| Current user                                              | 436                         | (100)  | -                                  | -      | 430                                      | (100)  | -                                            | -      |
| 2-9                                                       | -                           | -      | 151                                | (39.5) | -                                        | -      | -                                            | -      |
| ≥10                                                       | -                           | -      | 231                                | (60.5) | -                                        | -      | 231                                          | (100)  |
| <b><i>Ever used wood for cooking</i></b>                  | 435                         | (99.8) | 358                                | (86.5) | 429                                      | (99.8) | 218                                          | (82.9) |
| <b><i>Ever used cow dung for cooking</i></b>              | 422                         | (96.8) | 358                                | (86.5) | 416                                      | (96.7) | 216                                          | (82.1) |
| <b><i>Ever used kerosene for cooking</i></b>              | 16                          | (3.7)  | 26                                 | (6.3)  | 16                                       | (3.7)  | 17                                           | (6.5)  |
| <b><i>Ever used LPG/natural gas for cooking</i></b>       | 17                          | (3.9)  | 413                                | (99.8) | 15                                       | (3.5)  | 263                                          | (100)  |
| <b><i>Average hours per day cooked in past year</i></b>   |                             |        |                                    |        |                                          |        |                                              |        |
| ≤1                                                        | 129                         | (29.6) | 133                                | (32.1) | 123                                      | (28.6) | 75                                           | (28.5) |
| 2-3                                                       | 270                         | (61.9) | 237                                | (57.3) | 270                                      | (62.8) | 165                                          | (62.7) |
| ≥4                                                        | 37                          | (8.5)  | 44                                 | (10.6) | 37                                       | (8.6)  | 23                                           | (8.8)  |
| <b><i>Type of stove used for cooking</i></b>              |                             |        |                                    |        |                                          |        |                                              |        |
| Gas/LPG                                                   | 2                           | (0.5)  | 414                                | (100)  | 2                                        | (0.5)  | 263                                          | (100)  |
| Biomass with chimney/improved stove                       | 166                         | (38.1) | -                                  | -      | 164                                      | (38.1) | -                                            | -      |
| Biomass with three brick open stove                       | 267                         | (61.2) | -                                  | -      | 263                                      | (61.2) | -                                            | -      |
| Other                                                     | 1                           | (0.2)  | -                                  | -      | 1                                        | (0.2)  | -                                            | -      |
| <b><i>Type of kitchen</i></b>                             |                             |        |                                    |        |                                          |        |                                              |        |
| Closed (four walls – linked with living room or separate) | 88                          | (20.2) | 116                                | (28.0) | 86                                       | (20.0) | 79                                           | (30.0) |
| Semi-open (fewer than four walls)                         | 189                         | (43.3) | 155                                | (37.4) | 187                                      | (43.5) | 94                                           | (35.7) |
| Open (no walls)                                           | 159                         | (36.5) | 143                                | (34.5) | 157                                      | (36.5) | 90                                           | (34.2) |
| <b><i>Heat home with biomass</i></b>                      | 237                         | (54.4) | 106                                | (25.6) | 236                                      | (54.9) | 74                                           | (28.1) |

**Table 3.** Distribution of risk factors across the four exposure categories.

| Characteristic                                                                                                        | Users of biomass (n=436) |        | Non-users of biomass (n=414) |        | Long-term users of biomass (n=430) |        | Long-term non-users of biomass (n=263) |        |
|-----------------------------------------------------------------------------------------------------------------------|--------------------------|--------|------------------------------|--------|------------------------------------|--------|----------------------------------------|--------|
|                                                                                                                       | n                        | (%)    | n                            | (%)    | n                                  | (%)    | n                                      | (%)    |
| <b>Birthweight</b>                                                                                                    |                          |        |                              |        |                                    |        |                                        |        |
| Lower than normal                                                                                                     | 117                      | (26.8) | 77                           | (18.6) | 114                                | (26.5) | 54                                     | (20.5) |
| Normal                                                                                                                | 239                      | (54.8) | 254                          | (61.4) | 237                                | (55.1) | 156                                    | (59.3) |
| Higher than normal                                                                                                    | 80                       | (18.4) | 83                           | (20.0) | 79                                 | (18.4) | 53                                     | (20.2) |
| <b>Ever hungry all the time during childhood because there was not enough food</b>                                    |                          |        |                              |        |                                    |        |                                        |        |
| No                                                                                                                    | 176                      | (40.4) | 176                          | (42.5) | 175                                | (40.7) | 122                                    | (46.4) |
| Yes                                                                                                                   | 260                      | (59.6) | 238                          | (57.5) | 255                                | (59.3) | 141                                    | (53.6) |
| <b>Lost weight during childhood</b>                                                                                   |                          |        |                              |        |                                    |        |                                        |        |
| No                                                                                                                    | 162                      | (37.2) | 182                          | (44.0) | 160                                | (37.2) | 119                                    | (45.2) |
| Yes                                                                                                                   | 274                      | (62.8) | 232                          | (56.0) | 270                                | (62.8) | 144                                    | (54.8) |
| <b>Ever smoked regularly (any of cigarettes, bidi, huqqa)</b>                                                         |                          |        |                              |        |                                    |        |                                        |        |
| Never                                                                                                                 | 390                      | (89.4) | 378                          | (91.3) | 384                                | (89.3) | 240                                    | (91.3) |
| Ever                                                                                                                  | 46                       | (10.6) | 36                           | (8.7)  | 46                                 | (10.7) | 23                                     | (8.7)  |
| <b>Environmental tobacco smoke (at least one other household member smoked cigarettes, bidi or huqqa in the home)</b> |                          |        |                              |        |                                    |        |                                        |        |
| No                                                                                                                    | 269                      | (61.7) | 267                          | (64.5) | 265                                | (61.6) | 173                                    | (65.8) |
| Yes                                                                                                                   | 167                      | (38.3) | 147                          | (35.5) | 165                                | (38.4) | 90                                     | (34.2) |
| <b>Physical activity score</b>                                                                                        |                          |        |                              |        |                                    |        |                                        |        |
| 0-2                                                                                                                   | 124                      | (28.4) | 205                          | (49.5) | 124                                | (28.8) | 149                                    | (56.7) |
| 3-4                                                                                                                   | 199                      | (45.6) | 156                          | (37.7) | 196                                | (45.6) | 91                                     | (34.6) |
| 5-6                                                                                                                   | 113                      | (25.9) | 53                           | (12.8) | 110                                | (25.6) | 23                                     | (8.7)  |
| <b>Consumption of meat or eggs</b>                                                                                    |                          |        |                              |        |                                    |        |                                        |        |
| Do not eat either meat or eggs as much as once per week                                                               | 173                      | (39.7) | 142                          | (34.3) | 172                                | (40.0) | 88                                     | (33.5) |
| Eat one of meat or eggs as much as once per week                                                                      | 176                      | (40.4) | 163                          | (39.4) | 173                                | (40.2) | 100                                    | (38.0) |
| Eat both meat and eggs at least once per week                                                                         | 87                       | (20.0) | 109                          | (26.3) | 85                                 | (19.8) | 75                                     | (28.5) |
| <b>Current nutrition<sup>a</sup></b>                                                                                  |                          |        |                              |        |                                    |        |                                        |        |
| Neither BMI nor WHR high                                                                                              | 183                      | (42.0) | 129                          | (31.2) | 179                                | (41.6) | 79                                     | (30.0) |
| One of BMI or WHR high                                                                                                | 151                      | (34.6) | 160                          | (38.7) | 149                                | (34.7) | 101                                    | (38.4) |
| Both BMI and WHR high                                                                                                 | 102                      | (23.4) | 124                          | (30.0) | 102                                | (23.7) | 82                                     | (31.2) |
| Not known                                                                                                             | 0                        | (0)    | 1                            | (0.2)  | 0                                  | (0)    | 1                                      | (0.4)  |

<sup>a</sup>BMI (kg/m<sup>2</sup>) ≥25 = high; WHR ≥0.85 = high.

**Table 4.** Associations of hypertension, angina, history of heart attack, and definite or probable CHD on ECG with current and long-term use of biomass for cooking.

| Outcome                                | Adjusted only for age (n=850) |           | Fully adjusted <sup>a</sup> (n=850) |           | Fully adjusted and limited to long-term users and non-users of biomass <sup>b</sup> (n=693) |           |
|----------------------------------------|-------------------------------|-----------|-------------------------------------|-----------|---------------------------------------------------------------------------------------------|-----------|
|                                        | OR                            | (95%CI)   | OR                                  | (95% CI)  | OR                                                                                          | (95% CI)  |
| <b>Hypertension</b>                    |                               |           |                                     |           |                                                                                             |           |
| Non-users of biomass                   | 1.0                           |           | 1.0                                 |           | 1.0                                                                                         |           |
| Users of biomass                       | 1.2                           | (0.9-1.5) | 1.0                                 | (0.8-1.4) | 1.1                                                                                         | (0.8-1.6) |
| <b>Angina</b>                          |                               |           |                                     |           |                                                                                             |           |
| Non-users of biomass                   | 1.0                           |           | 1.0                                 |           | 1.0                                                                                         |           |
| Users of biomass                       | 1.0                           | (0.7-1.3) | 1.0                                 | (0.8-1.4) | 1.3                                                                                         | (0.9-1.9) |
| <b>Heart Attack</b>                    |                               |           |                                     |           |                                                                                             |           |
| Non-users of biomass                   | 1.0                           |           | 1.0                                 |           | 1.0                                                                                         |           |
| Users of biomass                       | 1.4                           | (0.8-2.4) | 1.2                                 | (0.7-2.2) | 1.3                                                                                         | (0.7-2.4) |
| <b>Definite or probable CHD on ECG</b> |                               |           |                                     |           |                                                                                             |           |
| Non-users of biomass                   | 1.0                           |           | 1.0                                 |           | 1.0                                                                                         |           |
| Users of biomass user                  | 0.8                           | (0.6-1.2) | 0.8                                 | (0.6-1.2) | 0.9                                                                                         | (0.6-1.3) |

<sup>a</sup>Mutually adjusted risk estimates derived from a single regression model that included use of biomass and all of the variables that were significant ( $p < 0.1$ ) in analyses adjusted only for age

<sup>b</sup>Mutually adjusted risk estimates derived from a single regression model that included use of biomass and all of the variables that were significant ( $p < 0.1$ ) in analyses adjusted only for age, but was restricted to women who were long-term users or non-users of biomass

## Supplementary Materials

**Supplementary Table 1.** Prevalence of hypertension, history of heart attack, angina and coronary heart disease in study sample.

| Characteristic                                       | n   | (%)    |
|------------------------------------------------------|-----|--------|
| <b>Hypertension</b>                                  |     |        |
| Systolic hypertension (systolic BP $\geq$ 140 mmHg)  | 133 | (15.8) |
| Diastolic hypertension (diastolic BP $\geq$ 90 mmHg) | 102 | (12.1) |
| Regular medication for high blood pressure           | 198 | (23.5) |
| Hypertension (any of the above)                      | 297 | (35.3) |
| <b>Angina</b>                                        | 227 | (27.0) |
| <b>History of heart attack</b>                       | 54  | (6.4)  |
| <b>Definite or probable CHD on ECG<sup>a</sup></b>   | 159 | (18.9) |

<sup>a</sup>Based on 841 women. ECGs for 9 women were missing or could not be coded due to poor quality.



**Supplementary Table 2.** Classification of ECGs for definite or probable CHD by two observers.

| <b>Observer 1</b> | <b>Observer 2</b> |                 |
|-------------------|-------------------|-----------------|
|                   | <b>Negative</b>   | <b>Positive</b> |
| <b>Negative</b>   | 591               | 30              |
| <b>Positive</b>   | 94                | 122             |

**Kappa = 0.57**

For peer review only

**Supplementary Table 3.** Prevalence of definite or probable CHD changes on ECG according to history of heart attack and angina.

| Other measure of CHD                 | Definite or probable CHD changes on ECG <sup>a</sup> |        |     |        |
|--------------------------------------|------------------------------------------------------|--------|-----|--------|
|                                      | Yes                                                  |        | No  |        |
|                                      | n                                                    | (%)    | N   | (%)    |
| No history of heart attack or angina | 105                                                  | (18.2) | 471 | (81.8) |
| History of angina                    | 45                                                   | (19.8) | 182 | (80.2) |
| History of heart attack              | 14                                                   | (25.9) | 40  | (74.1) |
| History of angina or heart attack    | 54                                                   | (20.4) | 211 | (79.6) |
| History of angina and heart attack   | 5                                                    | (31.3) | 11  | (68.8) |

<sup>a</sup>ECGs for 9 women were missing or could not be coded due to poor quality.

**Supplementary Table 4.** Association of hypertension with risk factors.

| Risk factor                                                                                                                       | Adjusted only<br>for age<br>(n=850) |           | Fully adjusted <sup>a</sup><br>(n=850) |           | Fully adjusted and<br>limited to long-<br>term users and<br>non-users of<br>biomass <sup>b</sup><br>(n=693) |           |
|-----------------------------------------------------------------------------------------------------------------------------------|-------------------------------------|-----------|----------------------------------------|-----------|-------------------------------------------------------------------------------------------------------------|-----------|
|                                                                                                                                   | OR                                  | (95%CI)   | OR                                     | (95%CI)   | OR                                                                                                          | (95%CI)   |
| <b>Age (per 10 year increase)</b>                                                                                                 | 1.4                                 | (1.2-1.6) | 1.4                                    | (1.2-1.7) | 1.5                                                                                                         | (1.2-1.7) |
| <b>Educational status</b>                                                                                                         |                                     |           |                                        |           |                                                                                                             |           |
| Illiterate                                                                                                                        | 1.0                                 |           | -                                      |           | -                                                                                                           |           |
| Any literacy                                                                                                                      | 0.6                                 | (0.3-1.2) |                                        |           |                                                                                                             |           |
| <b>Household income/month</b>                                                                                                     |                                     |           |                                        |           |                                                                                                             |           |
| <3000-10000PKR                                                                                                                    | 1.0                                 |           | -                                      |           | -                                                                                                           |           |
| >10000PKR                                                                                                                         | 1.0                                 | (0.7-1.4) |                                        |           |                                                                                                             |           |
| <b>Household ownership</b>                                                                                                        |                                     |           |                                        |           |                                                                                                             |           |
| Rented                                                                                                                            | 1.0                                 |           | -                                      |           | -                                                                                                           |           |
| Own                                                                                                                               | 0.8                                 | (0.5-1.3) |                                        |           |                                                                                                             |           |
| <b>Construction of house</b>                                                                                                      |                                     |           |                                        |           |                                                                                                             |           |
| Katcha/semi-pucca                                                                                                                 | 1.0                                 |           | -                                      |           | -                                                                                                           |           |
| Pucca                                                                                                                             | 0.9                                 | (0.6-1.2) |                                        |           |                                                                                                             |           |
| <b>Number of household assets</b>                                                                                                 |                                     |           |                                        |           |                                                                                                             |           |
| 0-1                                                                                                                               | 1.0                                 |           | 1.0                                    |           | 1.0                                                                                                         |           |
| 2-3                                                                                                                               | 1.7                                 | (1.2-2.4) | 1.6                                    | (1.2-2.3) | 1.8                                                                                                         | (1.2-2.6) |
| ≥4                                                                                                                                | 2.4                                 | (1.6-3.6) | 2.3                                    | (1.5-3.4) | 2.7                                                                                                         | (1.7-4.3) |
| <b>Father's occupation in woman's<br/>childhood</b>                                                                               |                                     |           |                                        |           |                                                                                                             |           |
| Non-manual                                                                                                                        | 1.0                                 |           | -                                      |           | -                                                                                                           |           |
| Manual                                                                                                                            | 1.2                                 | (0.6-2.5) |                                        |           |                                                                                                             |           |
| <b>Birthweight</b>                                                                                                                |                                     |           |                                        |           |                                                                                                             |           |
| Lower than normal                                                                                                                 | 1.0                                 |           | -                                      |           | -                                                                                                           |           |
| Normal                                                                                                                            | 1.0                                 | (0.7-1.4) | -                                      |           | -                                                                                                           |           |
| Higher than normal                                                                                                                | 1.0                                 | (0.6-1.5) |                                        |           |                                                                                                             |           |
| <b>Ever hungry during all the time<br/>during childhood because there<br/>was not enough food</b>                                 |                                     |           |                                        |           |                                                                                                             |           |
| No                                                                                                                                | 1.0                                 |           | -                                      |           | -                                                                                                           |           |
| Yes                                                                                                                               | 0.9                                 | (0.7-1.3) |                                        |           |                                                                                                             |           |
| <b>Lost weight during childhood</b>                                                                                               |                                     |           |                                        |           |                                                                                                             |           |
| No                                                                                                                                | 1.0                                 |           | -                                      |           | -                                                                                                           |           |
| Yes                                                                                                                               | 1.2                                 | (0.9-1.6) |                                        |           |                                                                                                             |           |
| <b>Ever smoked regularly (any of<br/>cigarettes, bidi, huqqa)</b>                                                                 |                                     |           |                                        |           |                                                                                                             |           |
| Never                                                                                                                             | 1.0                                 |           | -                                      |           | -                                                                                                           |           |
| Ever                                                                                                                              | 0.8                                 | (0.5-1.3) |                                        |           |                                                                                                             |           |
| <b>Environmental tobacco smoke (at<br/>least one other household member<br/>smokes cigarettes, bidi or huqqa<br/>in the home)</b> |                                     |           |                                        |           |                                                                                                             |           |
| No                                                                                                                                | 1.0                                 |           | -                                      |           | -                                                                                                           |           |
| Yes                                                                                                                               | 0.8                                 | (0.6-1.1) |                                        |           |                                                                                                             |           |
| <b>Consumption of meat or eggs</b>                                                                                                |                                     |           |                                        |           |                                                                                                             |           |

|                                                         |     |           |     |           |     |           |
|---------------------------------------------------------|-----|-----------|-----|-----------|-----|-----------|
| Do not eat either meat or eggs as much as once per week | 1.0 |           | 1.0 |           | 1.0 |           |
| Eat one of meat or eggs as much as once per week        | 1.4 | (1.0-1.9) | 1.2 | (0.9-1.7) | 1.2 | (0.8-1.7) |
| Eat both meat and eggs at least once per week           | 1.4 | (1.0-2.1) | 1.2 | (0.8-1.8) | 1.2 | (0.8-1.9) |
| <b>Current nutrition<sup>c</sup></b>                    |     |           |     |           |     |           |
| Neither BMI nor WHR high                                | 1.0 |           | 1.0 |           | 1.0 |           |
| One of BMI or WHR high                                  | 1.2 | (0.9-1.7) | 1.2 | (0.8-1.6) | 1.2 | (0.8-1.8) |
| Both BMI and WHR high                                   | 2.0 | (1.4-2.9) | 1.9 | (1.3-2.8) | 1.8 | (1.2-2.7) |
| <b>Non-user of biomass</b>                              | 1.0 |           | 1.0 |           |     |           |
| <b>User of biomass</b>                                  | 1.2 | (0.9-1.5) | 1.0 | (0.8-1.4) |     |           |
| <b>Long-term non-user of biomass</b>                    | 1.0 |           |     |           | 1.0 |           |
| <b>Long-term user of biomass</b>                        | 1.2 | (0.9-1.7) |     |           | 1.1 | (0.8-1.6) |

<sup>a</sup>Mutually adjusted risk estimates derived from a single regression model that included use of biomass and all of the variables that were significant ( $p < 0.1$ ) in analyses adjusted only for age

<sup>b</sup>Mutually adjusted risk estimates derived from a single regression model that included use of biomass and all of the variables that were significant ( $p < 0.1$ ) in analyses adjusted only for age, but was restricted to women who were long-term users or non-users of biomass

<sup>c</sup>Body mass index (BMI) ( $\text{kg}/\text{m}^2$ )  $\geq 25$  = high; Waist-to-hip ratio (WHR)  $\geq 0.85$  = high.

**Supplementary Table 5.** Associations of angina with risk factors.

| Risk factor                                                                                                                       | Adjusted only<br>for age<br>(n=850) |           | Fully adjusted <sup>a</sup><br>(n=850) |           | Fully adjusted and<br>limited to long-<br>term users and<br>non-users of<br>biomass <sup>b</sup><br>(n=693) |           |
|-----------------------------------------------------------------------------------------------------------------------------------|-------------------------------------|-----------|----------------------------------------|-----------|-------------------------------------------------------------------------------------------------------------|-----------|
|                                                                                                                                   | OR                                  | (95%CI)   | OR                                     | (95%CI)   | OR                                                                                                          | (95%CI)   |
| <b>Age (per 10 year increase)</b>                                                                                                 | 1.3                                 | (1.1-1.6) | 1.3                                    | (1.1-1.5) | 1.3                                                                                                         | (1.1-1.5) |
| <b>Educational status</b>                                                                                                         |                                     |           |                                        |           |                                                                                                             |           |
| Illiterate                                                                                                                        | 1.0                                 |           | -                                      |           | -                                                                                                           |           |
| Any literacy                                                                                                                      | 0.6                                 | (0.3-1.3) |                                        |           |                                                                                                             |           |
| <b>Household income/month</b>                                                                                                     |                                     |           |                                        |           |                                                                                                             |           |
| <3000-10000PKR                                                                                                                    | 1.0                                 |           | -                                      |           | -                                                                                                           |           |
| >10000PKR                                                                                                                         | 1.1                                 | (0.8-1.6) |                                        |           |                                                                                                             |           |
| <b>Household ownership</b>                                                                                                        |                                     |           |                                        |           |                                                                                                             |           |
| Rented                                                                                                                            | 1.0                                 |           | -                                      |           | -                                                                                                           |           |
| Own                                                                                                                               | 0.8                                 | (0.5-1.3) |                                        |           |                                                                                                             |           |
| <b>Construction of house</b>                                                                                                      |                                     |           |                                        |           |                                                                                                             |           |
| Katcha/semi-pucca                                                                                                                 | 1.0                                 |           | -                                      |           | -                                                                                                           |           |
| Pucca                                                                                                                             | 1.2                                 | (0.8-1.7) |                                        |           |                                                                                                             |           |
| <b>Number of household assets</b>                                                                                                 |                                     |           |                                        |           |                                                                                                             |           |
| 0-1                                                                                                                               | 1.0                                 |           | -                                      |           | -                                                                                                           |           |
| 2-3                                                                                                                               | 0.9                                 | (0.6-1.3) |                                        |           |                                                                                                             |           |
| ≥4                                                                                                                                | 1.0                                 | (0.6-1.5) |                                        |           |                                                                                                             |           |
| <b>Father's occupation in woman's<br/>childhood</b>                                                                               |                                     |           |                                        |           |                                                                                                             |           |
| Non-manual                                                                                                                        | 1.0                                 |           | -                                      |           | -                                                                                                           |           |
| Manual                                                                                                                            | 0.7                                 | (0.3-1.4) |                                        |           |                                                                                                             |           |
| <b>Birthweight</b>                                                                                                                |                                     |           |                                        |           |                                                                                                             |           |
| Lower than normal                                                                                                                 | 1.0                                 |           | -                                      |           | -                                                                                                           |           |
| Normal                                                                                                                            | 1.2                                 | (0.8-1.8) | -                                      |           | -                                                                                                           |           |
| Higher than normal                                                                                                                | 1.1                                 | (0.7-1.8) |                                        |           |                                                                                                             |           |
| <b>Ever hungry during all the time<br/>during childhood because there<br/>was not enough food</b>                                 |                                     |           |                                        |           |                                                                                                             |           |
| No                                                                                                                                | 1.0                                 |           | -                                      |           | -                                                                                                           |           |
| Yes                                                                                                                               | 0.8                                 | (0.6-1.1) |                                        |           |                                                                                                             |           |
| <b>Lost weight during childhood</b>                                                                                               |                                     |           |                                        |           |                                                                                                             |           |
| No                                                                                                                                | 1.0                                 |           | -                                      |           | -                                                                                                           |           |
| Yes                                                                                                                               | 1.0                                 | (0.8-1.4) |                                        |           |                                                                                                             |           |
| <b>Ever smoked regularly (any of<br/>cigarettes, bidi, huqqa)</b>                                                                 |                                     |           |                                        |           |                                                                                                             |           |
| Never                                                                                                                             | 1.0                                 |           | 1.0                                    |           | 1.0                                                                                                         |           |
| Ever                                                                                                                              | 2.1                                 | (1.3-3.3) | 2.0                                    | (1.2-3.2) | 2.1                                                                                                         | (1.3-3.6) |
| <b>Environmental tobacco smoke<br/>(at least one other household<br/>member smokes cigarettes, bidi<br/>or huqqa in the home)</b> |                                     |           |                                        |           |                                                                                                             |           |
| No                                                                                                                                | 1.0                                 |           | -                                      |           | -                                                                                                           |           |
| Yes                                                                                                                               | 1.2                                 | (0.9-1.6) |                                        |           |                                                                                                             |           |
| <b>Consumption of meat or eggs</b>                                                                                                |                                     |           |                                        |           |                                                                                                             |           |

|                                                         |     |           |     |           |     |           |
|---------------------------------------------------------|-----|-----------|-----|-----------|-----|-----------|
| Do not eat either meat or eggs as much as once per week | 1.0 |           | 1.0 |           | 1.0 |           |
| Eat one of meat or eggs as much as once per week        | 0.6 | (0.4-0.8) | 0.6 | (0.4-0.8) | 0.7 | (0.5-1.0) |
| Eat both meat and eggs at least once per week           | 0.4 | (0.3-0.7) | 0.5 | (0.3-0.7) | 0.5 | (0.3-0.8) |
| <b>Current nutrition<sup>c</sup></b>                    |     |           |     |           |     |           |
| Neither BMI nor WHR high                                | 1.0 |           |     |           |     |           |
| One of BMI or WHR high                                  | 0.8 | (0.5-1.1) | -   |           |     |           |
| Both BMI and WHR high                                   | 0.8 | (0.5-1.2) |     |           |     |           |
| <b>Non-user of biomass</b>                              | 1.0 |           |     |           |     |           |
| <b>User of biomass user</b>                             | 1.0 | (0.7-1.3) | 1.0 | (0.8-1.4) |     |           |
| <b>Long-term non-user of biomass</b>                    | 1.0 |           |     |           | 1.0 |           |
| <b>Long-term non-user of biomass</b>                    | 1.2 | (0.9-1.7) |     |           | 1.3 | (0.9-1.9) |

<sup>a</sup>Mutually adjusted risk estimates derived from a single regression model that included use of biomass and all of the variables that were significant ( $p < 0.1$ ) in analyses adjusted only for age

<sup>b</sup>Mutually adjusted risk estimates derived from a single regression model that included use of biomass and all of the variables that were significant ( $p < 0.1$ ) in analyses adjusted only for age, but was restricted to women who were long-term users or non-users of biomass

<sup>c</sup>Body mass index (BMI) ( $\text{kg}/\text{m}^2$ )  $\geq 25$  = high; Waist-to-hip ratio (WHR)  $\geq 0.85$  = high.

**Supplementary Table 6.** Associations of previous history of heart attack (diagnosed by a physician) with risk factors.

| Risk factor                                                                                                                       | Adjusted only<br>for age<br>(n=850) <sup>a</sup> |           | Fully adjusted <sup>b</sup><br>(n=850) |           | Fully adjusted and<br>limited to long-term<br>users and non-users of<br>biomass <sup>c</sup><br>(n=693) |           |
|-----------------------------------------------------------------------------------------------------------------------------------|--------------------------------------------------|-----------|----------------------------------------|-----------|---------------------------------------------------------------------------------------------------------|-----------|
|                                                                                                                                   | OR                                               | (95%CI)   | OR                                     | (95%CI)   | OR                                                                                                      | (95%CI)   |
| <b>Age (per 10 year increase)</b>                                                                                                 | 1.5                                              | (1.2-2.0) | 1.5                                    | (1.2-2.0) | 1.5                                                                                                     | (1.2-2.0) |
| <b>Educational status</b>                                                                                                         |                                                  |           |                                        |           |                                                                                                         |           |
| Illiterate                                                                                                                        | 1.0                                              |           | -                                      |           | -                                                                                                       |           |
| Any literacy                                                                                                                      | 1.5                                              | (0.5-4.5) |                                        |           |                                                                                                         |           |
| <b>Household income/month</b>                                                                                                     |                                                  |           |                                        |           |                                                                                                         |           |
| <3000-10000PKR                                                                                                                    | 1.0                                              |           | 1.0                                    |           | 1.0                                                                                                     |           |
| >10000PKR                                                                                                                         | 1.6                                              | (0.9-2.9) | 1.4                                    | (0.8-2.5) | 1.6                                                                                                     | (0.8-3.1) |
| <b>Household ownership</b>                                                                                                        |                                                  |           |                                        |           |                                                                                                         |           |
| Rented                                                                                                                            | 1.0                                              |           | -                                      |           | -                                                                                                       |           |
| Own                                                                                                                               | 1.2                                              | (0.4-3.4) |                                        |           |                                                                                                         |           |
| <b>Construction of house</b>                                                                                                      |                                                  |           |                                        |           |                                                                                                         |           |
| Katcha/semi-pucca                                                                                                                 |                                                  |           | -                                      |           | -                                                                                                       |           |
| Pucca                                                                                                                             | 1.3                                              | (0.7-2.3) |                                        |           |                                                                                                         |           |
| <b>Number of household assets</b>                                                                                                 |                                                  |           |                                        |           |                                                                                                         |           |
| 0-1                                                                                                                               | 1.0                                              |           | 1.0                                    |           | 1.0                                                                                                     |           |
| 2-3                                                                                                                               | 1.4                                              | (0.7-2.7) | 1.3                                    | (0.7-2.5) | 1.8                                                                                                     | (0.8-3.8) |
| ≥4                                                                                                                                | 2.1                                              | (1.0-4.3) | 1.8                                    | (0.8-3.8) | 2.1                                                                                                     | (0.9-5.1) |
| <b>Father's occupation in woman's<br/>childhood</b>                                                                               |                                                  |           |                                        |           |                                                                                                         |           |
| Non-manual                                                                                                                        | 1.0                                              |           | -                                      |           | -                                                                                                       |           |
| Manual                                                                                                                            | 1.0                                              | (0.2-4.5) |                                        |           |                                                                                                         |           |
| <b>Birthweight</b>                                                                                                                |                                                  |           |                                        |           |                                                                                                         |           |
| Lower than normal                                                                                                                 | 1.0                                              |           |                                        |           | -                                                                                                       |           |
| Normal                                                                                                                            | 1.0                                              | (0.5-1.9) | -                                      |           |                                                                                                         |           |
| Higher than normal                                                                                                                | 0.7                                              | (0.3-1.7) |                                        |           |                                                                                                         |           |
| <b>Ever hungry during all the time<br/>during childhood because there<br/>was not enough food</b>                                 |                                                  |           |                                        |           |                                                                                                         |           |
| No                                                                                                                                | 1.0                                              |           | -                                      |           | -                                                                                                       |           |
| Yes                                                                                                                               | 1.0                                              | (0.6-1.7) |                                        |           |                                                                                                         |           |
| <b>Lost weight during childhood</b>                                                                                               |                                                  |           |                                        |           |                                                                                                         |           |
| No                                                                                                                                | 1.0                                              |           | -                                      |           | -                                                                                                       |           |
| Yes                                                                                                                               | 1.1                                              | (0.6-1.9) |                                        |           |                                                                                                         |           |
| <b>Ever smoked regularly (any of<br/>cigarettes, bidi, huqqa)</b>                                                                 |                                                  |           |                                        |           |                                                                                                         |           |
| Never                                                                                                                             | 1.0                                              |           | -                                      |           | -                                                                                                       |           |
| Ever                                                                                                                              | 0.9                                              | (0.4-2.1) |                                        |           |                                                                                                         |           |
| <b>Environmental tobacco smoke (at<br/>least one other household member<br/>smokes cigarettes, bidi or huqqa in<br/>the home)</b> |                                                  |           |                                        |           |                                                                                                         |           |
| No                                                                                                                                | 1.0                                              |           | -                                      |           | -                                                                                                       |           |
| Yes                                                                                                                               | 0.9                                              | (0.5-1.6) |                                        |           |                                                                                                         |           |
| <b>Consumption of meat or eggs</b>                                                                                                |                                                  |           |                                        |           |                                                                                                         |           |



|                                                         |     |           |     |           |               |
|---------------------------------------------------------|-----|-----------|-----|-----------|---------------|
| Do not eat either meat or eggs as much as once per week | 1.0 |           | -   |           |               |
| Eat one of meat or eggs as much as once per week        | 1.2 | (0.6-2.3) |     |           |               |
| Eat both meat and eggs at least once per week           | 1.8 | (0.9-3.5) |     |           |               |
| <b>Current nutrition<sup>d</sup></b>                    |     |           |     |           |               |
| Neither BMI nor WHR high                                | 1.0 |           | 1.0 | 1.0       |               |
| One of BMI or WHR high                                  | 1.3 | (0.6-2.5) | 1.2 | (0.6-2.5) | 1.6 (0.7-3.4) |
| Both BMI and WHR high                                   | 2.0 | (1.0-4.0) | 1.9 | (0.9-3.7) | 1.7 (0.8-3.6) |
| <b>Non-user of biomass</b>                              | 1.0 |           | 1.0 | -         |               |
| <b>Use of biomass</b>                                   | 1.4 | (0.8-2.4) | 1.2 | (0.7-2.2) |               |
| <b>Long-term non-user of biomass</b>                    | 1.0 |           |     | 1.0       |               |
| <b>Long-term user of biomass</b>                        | 1.5 | (0.8-2.7) |     | 1.3       | (0.7-2.4)     |

<sup>a</sup>Mutually adjusted risk estimates derived from a single regression model that included use of biomass and all of the variables that were significant ( $p < 0.1$ ) in analyses adjusted only for age

<sup>b</sup>Mutually adjusted risk estimates derived from a single regression model that included use of biomass and all of the variables that were significant ( $p < 0.1$ ) in analyses adjusted only for age, but was restricted to women who were long-term users or non-users of biomass

<sup>c</sup>Body mass index (BMI) ( $\text{kg}/\text{m}^2$ )  $\geq 25$  = high; Waist-to-hip ratio (WHR)  $\geq 0.85$  = high.

**Supplementary Table 7.** Associations of definite or probable CHD on ECG with risk factors.

| Risk factor                                                                                                           | Adjusted only for age<br>(n=841) |           | Fully adjusted <sup>a</sup><br>(n=841) |           | Fully adjusted and limited to long-term users and non-users of biomass <sup>b</sup><br>(n=686) |           |
|-----------------------------------------------------------------------------------------------------------------------|----------------------------------|-----------|----------------------------------------|-----------|------------------------------------------------------------------------------------------------|-----------|
|                                                                                                                       | OR                               | (95%CI)   | OR                                     | (95%CI)   | OR                                                                                             | (95%CI)   |
| <b>Age (per 10 year increase)</b>                                                                                     | 1.1                              | (0.9-1.3) | 1.1                                    | (0.9-1.3) | 1.0                                                                                            | (0.8-1.3) |
| <b>Educational status</b>                                                                                             |                                  |           |                                        |           |                                                                                                |           |
| Illiterate                                                                                                            | 1.0                              |           | -                                      |           | -                                                                                              |           |
| Any literacy                                                                                                          | 0.8                              | (0.4-1.7) |                                        |           |                                                                                                |           |
| <b>Household income/month</b>                                                                                         |                                  |           |                                        |           |                                                                                                |           |
| <3000-10000PKR                                                                                                        | 1.0                              |           | 1.0                                    |           | 1.0                                                                                            |           |
| >10000PKR                                                                                                             | 1.6                              | (1.1-2.3) | 1.6                                    | (1.1-2.4) | 1.3                                                                                            | (0.8-2.0) |
| <b>Household ownership</b>                                                                                            |                                  |           |                                        |           |                                                                                                |           |
| Rented                                                                                                                | 1.0                              |           | -                                      |           | -                                                                                              |           |
| Own                                                                                                                   | 1.4                              | (0.7-2.9) |                                        |           |                                                                                                |           |
| <b>Construction of house</b>                                                                                          |                                  |           |                                        |           |                                                                                                |           |
| Katcha/semi-pucca                                                                                                     | 1.0                              |           | -                                      |           | -                                                                                              |           |
| Pucca                                                                                                                 | 1.0                              | (0.7-1.5) |                                        |           |                                                                                                |           |
| <b>Number of household assets</b>                                                                                     |                                  |           |                                        |           |                                                                                                |           |
| 0-1                                                                                                                   | 1.0                              |           | -                                      |           | -                                                                                              |           |
| 2-3                                                                                                                   | 1.0                              | (0.7-1.5) |                                        |           |                                                                                                |           |
| ≥4                                                                                                                    | 1.3                              | (0.8-2.1) |                                        |           |                                                                                                |           |
| <b>Father's occupation in woman's childhood</b>                                                                       |                                  |           |                                        |           |                                                                                                |           |
| Non-manual                                                                                                            | 1.0                              |           | -                                      |           | -                                                                                              |           |
| Manual                                                                                                                | 1.0                              | (0.4-2.3) |                                        |           |                                                                                                |           |
| <b>Birthweight</b>                                                                                                    |                                  |           |                                        |           |                                                                                                |           |
| Lower than normal                                                                                                     | 1.0                              |           | -                                      |           | -                                                                                              |           |
| Normal                                                                                                                | 1.1                              | (0.7-1.7) | -                                      |           | -                                                                                              |           |
| Higher than normal                                                                                                    | 1.1                              | (0.7-1.9) |                                        |           |                                                                                                |           |
| <b>Ever hungry during all the time during childhood because there was not enough food</b>                             |                                  |           |                                        |           |                                                                                                |           |
| No                                                                                                                    | 1.0                              |           | -                                      |           | -                                                                                              |           |
| Yes                                                                                                                   | 1.1                              | (0.8-1.6) |                                        |           |                                                                                                |           |
| <b>Lost weight during childhood</b>                                                                                   |                                  |           |                                        |           |                                                                                                |           |
| No                                                                                                                    | 1.0                              |           | -                                      |           | -                                                                                              |           |
| Yes                                                                                                                   | 0.8                              | (0.6-1.2) |                                        |           |                                                                                                |           |
| <b>Ever smoked regularly (any of cigarettes, bidi, huqqa)</b>                                                         |                                  |           |                                        |           |                                                                                                |           |
| Never                                                                                                                 | 1.0                              |           | -                                      |           | -                                                                                              |           |
| Ever                                                                                                                  | 1.0                              | (0.6-1.8) |                                        |           |                                                                                                |           |
| <b>Environmental tobacco smoke (at least one other household member smokes cigarettes, bidi or huqqa in the home)</b> |                                  |           |                                        |           |                                                                                                |           |
| No                                                                                                                    | 1.0                              |           | -                                      |           | -                                                                                              |           |
| Yes                                                                                                                   | 0.9                              | (0.6-1.3) | -                                      |           | -                                                                                              |           |
| <b>Consumption of meat or eggs</b>                                                                                    |                                  |           |                                        |           |                                                                                                |           |

|                                                         |     |           |  |
|---------------------------------------------------------|-----|-----------|--|
| Do not eat either meat or eggs as much as once per week | 1.0 |           |  |
| Eat one of meat or eggs as much as once per week        | 0.9 | (0.6-1.4) |  |
| Eat both meat and eggs at least once per week           | 1.2 | (0.7-1.8) |  |

---

**Current nutrition<sup>c</sup>**

|                          |     |           |   |
|--------------------------|-----|-----------|---|
| Neither BMI nor WHR high | 1.0 |           |   |
| One of BMI or WHR high   | 0.8 | (0.5-1.2) | - |
| Both BMI and WHR high    | 1.1 | (0.7-1.6) |   |

---

**Non-user of biomass user** 1.0 1.0

**User of biomass** 0.8 (0.6-1.2) 0.8 (0.6-1.2)

---

**Longterm non-user of biomass** 1.0 1.0

**Longterm user of biomass** 0.9 (0.6-1.3) 0.9 (0.6-1.3)

---

<sup>a</sup>ECGs were missing for 9 women or not codable due to poor quality.

<sup>b</sup>Mutually adjusted risk estimates derived from a single regression model that included use of biomass and all of the variables that were significant ( $p < 0.1$ ) in analyses adjusted only for age

<sup>c</sup>Mutually adjusted risk estimates derived from a single regression model that included use of biomass and all of the variables that were significant ( $p < 0.1$ ) in analyses adjusted only for age, but was restricted to women who were long-term users or non-users of biomass

<sup>d</sup>Body mass index (BMI) ( $\text{kg}/\text{m}^2$ )  $\geq 25$  = high; Waist-to-hip ratio (WHR)  $\geq 0.85$  = high.

**STROBE 2007 (v4) Statement—Checklist of items that should be included in reports of *cross-sectional studies***

| Section/Topic                | Item # | Recommendation                                                                                                                                                                       | Reported on page # |
|------------------------------|--------|--------------------------------------------------------------------------------------------------------------------------------------------------------------------------------------|--------------------|
| <b>Title and abstract</b>    | 1      | (a) Indicate the study's design with a commonly used term in the title or the abstract                                                                                               | 1                  |
|                              |        | (b) Provide in the abstract an informative and balanced summary of what was done and what was found                                                                                  | 1-2                |
| <b>Introduction</b>          |        |                                                                                                                                                                                      |                    |
| Background/rationale         | 2      | Explain the scientific background and rationale for the investigation being reported                                                                                                 | 3                  |
| Objectives                   | 3      | State specific objectives, including any prespecified hypotheses                                                                                                                     | 3                  |
| <b>Methods</b>               |        |                                                                                                                                                                                      |                    |
| Study design                 | 4      | Present key elements of study design early in the paper                                                                                                                              | 3                  |
| Setting                      | 5      | Describe the setting, locations, and relevant dates, including periods of recruitment, exposure, follow-up, and data collection                                                      | 3                  |
| Participants                 | 6      | (a) Give the eligibility criteria, and the sources and methods of selection of participants                                                                                          | 3                  |
| Variables                    | 7      | Clearly define all outcomes, exposures, predictors, potential confounders, and effect modifiers. Give diagnostic criteria, if applicable                                             | 3-5                |
| Data sources/<br>measurement | 8*     | For each variable of interest, give sources of data and details of methods of assessment (measurement). Describe comparability of assessment methods if there is more than one group | 3-5                |
| Bias                         | 9      | Describe any efforts to address potential sources of bias                                                                                                                            | 3-5                |
| Study size                   | 10     | Explain how the study size was arrived at                                                                                                                                            | 5                  |
| Quantitative variables       | 11     | Explain how quantitative variables were handled in the analyses. If applicable, describe which groupings were chosen and why                                                         | 5                  |
| Statistical methods          | 12     | (a) Describe all statistical methods, including those used to control for confounding                                                                                                | 5                  |
|                              |        | (b) Describe any methods used to examine subgroups and interactions                                                                                                                  | 5                  |
|                              |        | (c) Explain how missing data were addressed                                                                                                                                          | In relevant tables |
|                              |        | (d) If applicable, describe analytical methods taking account of sampling strategy                                                                                                   | N/A                |
|                              |        | (e) Describe any sensitivity analyses                                                                                                                                                | N/A                |
| <b>Results</b>               |        |                                                                                                                                                                                      |                    |

|                          |     |                                                                                                                                                                                                              |                          |
|--------------------------|-----|--------------------------------------------------------------------------------------------------------------------------------------------------------------------------------------------------------------|--------------------------|
| Participants             | 13* | (a) Report numbers of individuals at each stage of study—eg numbers potentially eligible, examined for eligibility, confirmed eligible, included in the study, completing follow-up, and analysed            | 6                        |
|                          |     | (b) Give reasons for non-participation at each stage                                                                                                                                                         | 6                        |
|                          |     | (c) Consider use of a flow diagram                                                                                                                                                                           | Not needed               |
| Descriptive data         | 14* | (a) Give characteristics of study participants (eg demographic, clinical, social) and information on exposures and potential confounders                                                                     | 6 and Tables 1-3         |
|                          |     | (b) Indicate number of participants with missing data for each variable of interest                                                                                                                          | Tables 1-3               |
| Outcome data             | 15* | Report numbers of outcome events or summary measures                                                                                                                                                         | 6                        |
| Main results             | 16  | (a) Give unadjusted estimates and, if applicable, confounder-adjusted estimates and their precision (eg, 95% confidence interval). Make clear which confounders were adjusted for and why they were included | Supplementary Tables 4-7 |
|                          |     | (b) Report category boundaries when continuous variables were categorized                                                                                                                                    | Tables                   |
|                          |     | (c) If relevant, consider translating estimates of relative risk into absolute risk for a meaningful time period                                                                                             | N/A                      |
| Other analyses           | 17  | Report other analyses done—eg analyses of subgroups and interactions, and sensitivity analyses                                                                                                               | N/A                      |
| <b>Discussion</b>        |     |                                                                                                                                                                                                              |                          |
| Key results              | 18  | Summarise key results with reference to study objectives                                                                                                                                                     | 8                        |
| Limitations              | 19  | Discuss limitations of the study, taking into account sources of potential bias or imprecision. Discuss both direction and magnitude of any potential bias                                                   | 8-9                      |
| Interpretation           | 20  | Give a cautious overall interpretation of results considering objectives, limitations, multiplicity of analyses, results from similar studies, and other relevant evidence                                   | 10                       |
| Generalisability         | 21  | Discuss the generalisability (external validity) of the study results                                                                                                                                        | 8                        |
| <b>Other information</b> |     |                                                                                                                                                                                                              |                          |
| Funding                  | 22  | Give the source of funding and the role of the funders for the present study and, if applicable, for the original study on which the present article is based                                                | 2                        |

\*Give information separately for cases and controls in case-control studies and, if applicable, for exposed and unexposed groups in cohort and cross-sectional studies.

**Note:** An Explanation and Elaboration article discusses each checklist item and gives methodological background and published examples of transparent reporting. The STROBE checklist is best used in conjunction with this article (freely available on the Web sites of PLoS Medicine at <http://www.plosmedicine.org/>, Annals of Internal Medicine at <http://www.annals.org/>, and Epidemiology at <http://www.epidem.com/>). Information on the STROBE Initiative is available at [www.strobe-statement.org](http://www.strobe-statement.org).

# BMJ Open

## Coronary Heart Disease, Hypertension and Use of Biomass Fuel among Women: Comparative Cross-sectional Study.

|                                 |                                                                                                                                                                                                                                                                                  |
|---------------------------------|----------------------------------------------------------------------------------------------------------------------------------------------------------------------------------------------------------------------------------------------------------------------------------|
| Journal:                        | <i>BMJ Open</i>                                                                                                                                                                                                                                                                  |
| Manuscript ID                   | bmjopen-2019-030881.R2                                                                                                                                                                                                                                                           |
| Article Type:                   | Research                                                                                                                                                                                                                                                                         |
| Date Submitted by the Author:   | 03-Jul-2019                                                                                                                                                                                                                                                                      |
| Complete List of Authors:       | Fatmi, Zafar; Aga Khan University, Department of Community Health Sciences<br>Ntani, G; University of Southampton and Southampton University Hospitals NHS Trust, MRC Lifecourse Epidemiology Unit<br>Coggon, David; University of Southampton, MRC Lifecourse Epidemiology Unit |
| <b>Primary Subject Heading</b>: | Global health                                                                                                                                                                                                                                                                    |
| Secondary Subject Heading:      | Epidemiology, Occupational and environmental medicine, Public health                                                                                                                                                                                                             |
| Keywords:                       | Coronary heart disease < CARDIOLOGY, biomass fuel, Hypertension < CARDIOLOGY, women, EPIDEMIOLOGY, Public health < INFECTIOUS DISEASES                                                                                                                                           |
|                                 |                                                                                                                                                                                                                                                                                  |

SCHOLARONE™  
Manuscripts

# Coronary Heart Disease, Hypertension and Use of Biomass Fuel among Women: Comparative Cross-sectional Study.

Zafar Fatmi,<sup>1,2</sup> Georgia Ntani,<sup>2</sup> David Coggon<sup>2</sup>

<sup>1</sup>Department of Community Health Sciences, Aga Khan University, PO Box 3500, Karachi 74800, Pakistan.

<sup>2</sup>MRC Lifecourse Epidemiology Unit, University of Southampton, Southampton, UK.

\*Correspondence should be addressed to Zafar Fatmi; [zafar.fatmi@aku.edu](mailto:zafar.fatmi@aku.edu) ;

## Abstract

**Objectives:** To explore the associations of hypertension and coronary heart disease (CHD) with use of biomass fuel for cooking.

**Design:** Comparative cross-sectional study.

**Setting:** Rural villages in Sindh, Pakistan.

**Participants:** Women aged  $\geq 40$  years who had used biomass fuel for cooking for at least the past year (n = 436), and a comparison group (n=414) who had cooked only with non-biomass fuel during the past year were recruited through door-to-door visits. None of those who were invited to take part declined.

**Primary and secondary outcome measures:** Hypertension was determined from blood pressure measurements and use of medication. CHD was assessed by three measures: history of angina (Rose angina questionnaire), previous history of 'heart attack', and definite or probable changes of CHD on electrocardiogram (ECG). Potentially confounding risk factors were ascertained by questionnaire and anthropometry. Associations of hypertension and CHD with use of biomass and other risk factors were assessed by logistic regression, and summarised by odds ratios (ORs) with 95% confidence intervals (CIs).

**Results:** After adjustment for potential confounders, there was no association of hypertension (OR: 1.0, 95% CI 0.8 – 1.4) angina (OR: 1.0, 95% CI 0.8-1.4), heart attack (OR: 1.2, 95% CI 0.7 – 2.2) or ECG changes of CHD (OR: 0.8, 95% CI 0.6 – 1.2) with current use of biomass for cooking. Nor were any associations apparent when analyses were restricted to long-term ( $\geq 10$  years) users and non-users of biomass fuel.

**Conclusions:** A linked air monitoring study indicated substantially higher airborne concentrations of fine particulate matter in kitchens where biomass was used for cooking. It is possible that associations with CHD and hypertension were missed because most of the comparison group had used biomass for cooking at some time in the past, and risk remains elevated for many years after last exposure.

## Strengths and limitations of this study:

- The study was well-powered with a high response rate (93%) from those invited to take part, and large contrasts in recent exposure to indoor air pollution.



- Comparisons were based on recent cooking practices, but some exposures may have changed since the onset of coronary heart disease.
- Many women who did not currently use biomass for cooking, had done so in the past, and this may have obscured associations with health outcomes if effects of exposure persist long-term.
- Errors may have occurred in the assessment of outcome measures, biasing risk estimates towards the null.
- Recall of some potentially confounding factors may have been inaccurate, leading to uncontrolled residual confounding.

### **Funding Statement**

This research was supported by a fellowship from the Colt Foundation for the conduct of a PhD by Professor Zafar Fatmi. Professor David Coggon and Dr Georgia Ntani were supported by funding from the UK Medical Research Council (MRC\_MC\_UU\_12011/5).

### **Conflicts of Interest**

The authors declare that there is no conflict of interest regarding the publication of this paper.

### **Authors' contributions**

ZF led the design and conduct of the study, carried out the initial statistical analyses, and wrote the first draft of the manuscript.

GN oversaw and guided the statistical analysis.

DC supervised the project and amended the first draft of the manuscript.

All authors approved the final version of the manuscript.

## Introduction

Three (3) billion people across the globe use solid fuel (such as wood, crop wastes, animal-dung, and charcoal/coal) for cooking and heating the homes [1]. Burning of solid fuels in inefficient stoves or open fires causes household air pollution (HAP) and 3.8 million deaths globally [2]. It primarily affects women and young children in low- and middle income countries (LMICs) who work 4-5 hours daily in the kitchen and spend 90% time at home, respectively [2,3] About 77% of household in Africa and 60% in Southeast Asia use solid fuel in homes [1].

The HAP consists of hundreds of health-damaging pollutants, however, finer particles ( $<2.5\mu\text{m}$  –  $\text{PM}_{2.5}$ ) and carbon monoxide (CO) are major emissions studied extensively.  $\text{PM}_{2.5}$  and CO affects lungs and absorbed into the blood and causes inflammation of the airways and lungs and impairs immune response [4].  $\text{PM}_{2.5}$  could be 100 times higher in kitchen and living rooms than acceptable standard of ambient (outdoor) air [5]. HAP is known to cause upper and lower respiratory tract infections among children [6-8], chronic obstructive pulmonary disease [9-10] and lung cancer [11-13]. Also lead to early foetal loss, preterm delivery, low birth weight babies [14,15] and may affect physical and cognitive development of young children [16].

In addition, several studies have suggested a hazard of coronary heart disease (CHD), but evidence for this is more limited and mixed [17, 18]. Several outcomes of cardiovascular diseases were studied including acute coronary syndromes (such as myocardial infarction/unstable angina), coronary heart diseases, and blood pressure. Two small scale case-control studies found significantly high risk of myocardial infarction (MI)/unstable angina with use of solid fuel [19,20]. In addition, a cohort study found association with MI and coal use among women in China [21]. Lee and colleagues [22], in a large cross-sectional self-reported survey of adults in China found a positive association with CHD. On the other hand, two large cohort studies, one in Iran [23] and other in Bangladesh [24] found no association with CHD. However, it was unclear how potential confounders were taken into account. On the other hand, most of the published studies have found significant positive associations with use of solid fuel with higher blood pressure [25-28] or prevalence of hypertension [22, 29-31]. However, few studies were also found insignificant differences in blood pressure [25,32-33].

In Pakistan, 52% households overall and 75% in rural areas use solid fuel for cooking and also for heating, particularly in colder northern part of the country. One pilot case control study was conducted in Pakistan to determine the association of solid fuel use and acute coronary syndrome and found high risk [20]. We, therefore, carried out a cross-sectional survey to explore the association between CHD and cooking with biomass in a sample of women drawn from the general population in rural areas of Pakistan. The objective of the study was to compare the prevalence of hypertension, angina, previous history of heart attack, and electrocardiographic (ECG) changes indicative of CHD in women  $\geq 40$  years of age who used biomass fuel for cooking with that in women of similar age who cooked using other types of fuel.

## Materials and Methods

### *Study Setting*

The survey was conducted during 2015 in villages surrounding the main urban area of Nawabshah district (recently renamed as Shaheed Benazirabad) in the province of Sindh, Pakistan. These were selected to give a mix in the fuels used for cooking within the study sample. Some of the villages had been supplied with natural gas for at least 10 years, whereas in others biomass fuel (wood and/or cow dung) was still being used.

### *Recruitment of households and subjects*

1  
2  
3 Within each village, trained field workers made door-to-door visits, and asked the heads of  
4 households whether their families would be willing to assist with the study, and if so, what type of  
5 fuel was used for cooking, and whether food preparation was regularly undertaken by a woman  $\geq 40$   
6 years of age. In this way, the study team identified quotas of the required numbers of households in  
7 each of the two categories of fuel use (biomass and other). The heads of these households were then  
8 asked to complete a consent form, and to identify and introduce the woman of the household aged  $\geq 40$   
9 years who had carried out the most cooking in the house over the past 10 years. The study was  
10 explained to her, and she was invited to participate and to give signed consent.  
11

### 12 *Inclusion criteria*

13  
14  
15 Women aged 40 years or older were eligible for inclusion if they gave informed consent, and had  
16 been cooking in the household for at least the past year, using only one of biomass fuel or non-  
17 biomass fuel.  
18

### 19 *Questionnaire, examination and measurements*

20  
21 A standardized questionnaire was used to collect information at interview about: demographic and  
22 socio-economic characteristics, birth weight, smoking history, whether another member of the  
23 household was a regular smoker, relevant aspects of diet, physical activity, lifetime history of cooking  
24 using different types of fuel, any previous diagnosis of a “heart attack” by a doctor, symptoms of  
25 angina (through the Rose angina questionnaire [34]), and any current use of medication for  
26 hypertension. In addition, measurements were made of height, weight, waist circumference, hip  
27 circumference and blood pressure.  
28

29  
30 Socioeconomic status was characterized by the literacy of the participant (no vs. any literacy), the  
31 type of employment of her father during her childhood (manual or non-manual), the ownership and  
32 construction of her house (‘pucca’ i.e. made of concrete walls and roof or ‘katcha/semi-pucca’ i.e.  
33 made fully or partially of thatched walls and roof), the income level of the household, and the number  
34 of household assets owned from a list of seven. Birth weight was determined from participants’ recall  
35 as being ‘higher than normal vs. normal vs. lower than normal’.  
36

37  
38 The questions on smoking covered use of cigarettes, *bidi* (locally made cigarettes without filters) or a  
39 huqqa (pipe) regularly (at least once a week for a month or longer). The number of other people in  
40 the household who smoked provided a measure of domestic exposure to environmental tobacco  
41 smoke (ETS), which was classified according to whether at least one other household member  
42 smoked cigarettes, *bidi*, or a huqqa in the home.  
43

44  
45 Dietary questions covered the use of oil or ghee for cooking and eating, and weekly consumption of  
46 meat and eggs. The former was categorized to three levels: only or mostly use oil; mixed use of oil  
47 and ghee; only or mostly use ghee. Frequencies of consuming meat and eggs were each categorized  
48 to two levels: at least once per week vs. less than once per week.  
49

50  
51 Level of physical activity was assessed through questions on the frequency per week of shopping,  
52 fetching water, washing clothes, collecting wood for cooking, agricultural work on a farm and any  
53 other regular heavy physical work. Each of these activities was categorized to two levels: zero days  
54 per week or at least once per week. A composite physical activity score was then derived as the  
55 number of activities carried out at least once per week, with values ranging from 0 to 6.  
56

57  
58 Height, weight, and waist and hip circumference were measured using a stadiometer, digital weighing  
59 scale and measuring tape, following standardized methods. Body mass index (BMI) (weight in  
60 kilograms per squared height in meters) and waist-to-hip ratio (WHR) were then calculated from the  
measurements. BMIs  $\geq 25 \text{ kg/m}^2$  were considered abnormally high (overweight or obese), as were  
WHRs  $\geq 0.85$ .

### *Categories of exposure to biomass:*

Use of biomass was classed to two main categories; biomass users who currently used firewood and/or cow dung for cooking; and non-users of biomass who did not (other sorts of biomass were not used for cooking in the community studied).

In addition, two subsets of these main categories were distinguished: long-term biomass users who currently used firewood and/or cow dung for cooking and had done so for at least the past 10 years; and long-term non-users of biomass who currently did not use either firewood or cow dung for cooking and had not done so for at least 10 years.

### *Outcome measures:*

Four outcome measures were specified.

**Hypertension:** Three measurements of blood pressure were made at five-minute intervals, using an Omron upper arm blood pressure monitor, and mean values for systolic and diastolic blood pressure were derived. Women were deemed to have hypertension if they met at least one of three criteria: mean systolic blood pressure  $\geq 140$  mm Hg; mean diastolic blood pressure  $\geq 90$  mm Hg; regular use of medication for blood pressure.

**Angina:** Experience of angina was assessed through the WHO's Rose angina questionnaire [34], which comprises seven questions relating to chest pain, its anatomical distribution, precipitating and relieving factors, and duration. A diagnosis of angina required report of pain, pressure or discomfort in the chest centrally, or in both the left anterior chest and left arm, that occurred when walking uphill or hurrying, that caused the participant to stop or slow down when it occurred while walking, and that was then relieved within 10 minutes by standing still.

**Heart attack:** Previous diagnosis of "heart attack" by a doctor was ascertained through a single question: "In the past, have you ever been told by a health care provider that you had a 'heart attack'?"

**Definite or probable CHD on ECG:** A 12-lead ECG was recorded according to a standard protocol, and coded for the presence of definite or probable CHD, using the Minnesota Code Manual of Electrocardiographic Findings, second edition [35]. This corresponded to the presence of any of codes 1-1 to 1-3, 3-1, 4-1 to 4-4, 5-1 to 5-3, 7-1-1 and 9-2. In order to check the repeatability of the coding, two of us (ZF and DC) coded all of the ECGs independently. We used the same scanned ECG traces, without information about the type of cooking fuel used by the participant. Levels of agreement between the observers were assessed, using kappa statistics. Where differences occurred in the classification of an ECG trace, they were then resolved by discussion between the two observers.

### *Statistical analysis*

Data were double-entered in Epidata 3.1 software [36] for validation. All discrepancies were corrected by reference to the original questionnaire or record sheet. Statistical analysis was carried out with Stata version 12.0 [37].

As a first step, several variables were reclassified or combined, based on their distribution in the full study sample, and without knowledge of participants' use of biomass fuel. Thus, a combined index was derived for frequency of consuming meat and eggs with three levels: neither meat nor eggs as much as once per week; one of meat or eggs at least once per week; both meat and eggs at least once per week. Scores for physical activity were categorized into three levels: low (0-1 activities); medium (2-3); high (4 or more). Similarly, BMI and WHR were combined as a single variable with three categories: neither BMI nor WHR high; one of BMI or WHR high; both BMI and WHR high.

1  
2  
3 Descriptive statistics were produced for women in each of the four categories of exposure to biomass,  
4 summarizing their demographic and socioeconomic characteristics, current and past cooking  
5 arrangements, types and durations of fuel use, hours of cooking per day, types of stove and kitchen,  
6 and exposures to potentially confounding risk factors. The prevalence of the main outcomes was  
7 determined for the study sample overall, and the relationship of ECG changes to angina and history of  
8 heart attack was explored.  
9

10 Logistic regression analysis was then used to assess the association of each of the four outcome  
11 variables with use of biomass fuel for cooking and other possible risk factors. First, associations with  
12 each potential risk factor were determined after adjustment for age. The main exposure of interest  
13 (user or non-user of biomass) was then carried forward into a mutually adjusted model along with all  
14 other risk factors which showed associations ( $p \leq 0.1$ ) when examined individually. In addition, a  
15 second mutually adjusted model was fitted that compared long-term use and non-use of biomass for  
16 cooking.  
17

### 18 *Sample size*

19 The size of the study sample was determined by a power calculation which assumed an outcome  
20 prevalence of at least 6% for definite CHD among non-users of biomass fuel, based on a previous  
21 study in Pakistan [38] (the prevalence of other outcomes was expected to be higher). This indicated  
22 that we would require at least 876 women (438 users and 438 non-users of biomass) for 80% power to  
23 detect an odds ratio of 2.0 for the use of biomass fuel with a 5% level of statistical significance.  
24  
25  
26

### 27 *Patient and public involvement*

28 There was no involvement of patients or the public in development of this study.  
29

### 30 *Ethical approval*

31 The study was approved by Ethics Review Committee of Aga Khan University, Karachi, Pakistan.  
32  
33

## 34 **Results**

35 A total of 24 villages were visited in order to recruit the number of households required for the  
36 survey. In 14 villages all households used biomass for cooking, in three, all used natural gas, and in  
37 the other seven, both types of fuel were used. The number of participating households per village  
38 ranged from as few as three to as many as 210. Interviews were completed with women from a total  
39 of 1073 households, 536 of which currently used biomass fuel, and 537 natural gas (including LPG).  
40 No-one declined to participate in the study, but 77 women could not be interviewed because they  
41 were not at home at the time when the survey team visited (mostly because they were engaged in  
42 agricultural work).  
43  
44  
45  
46  
47

48 Among the 1073 women who completed interviews, 44 indicated that they were in fact aged less than  
49 40 years of age, and were therefore excluded from the analysis. An additional 151 women had not  
50 made meals regularly (at least one meal per day on most days of the week) during the past year, and  
51 were also excluded. We further excluded 28 women who did not currently use firewood or cow dung  
52 for cooking, but whose time since last use of biomass was  $< 2$  years (this was done to ensure distinct  
53 exposure categories). Thus, further analysis was based on 850 women: 436 users and 414 non-users of  
54 biomass. Among them, 430 were long-term users of biomass users, and 263 were long-term non-  
55 users.  
56  
57

58 Table 1 summarizes the demographic and socioeconomic characteristics of the participants in the  
59 study sample overall, and according to categories of exposure to biomass fuel. In comparison with  
60



users of biomass, non-users were marginally younger (63% versus 60% <50 years), and somewhat more advantaged socioeconomically.

Table 2 describes the current and past cooking arrangements of participants, including type and duration of fuel use, intensity of cooking, and type of stove and kitchen. Even among the long-term non-users of biomass, 88% had cooked with biomass fuels at some time in their life. Among the biomass users, the large majority had used wood (93%) and cow dung (88%) for longer than 20 years. Few participants (3.7% of biomass users and 6.3% of non-users) had ever used kerosene as a cooking fuel. Most participants (approximately 60%) currently cooked for 2-3 hours per day, the average duration of cooking per day being similar in users and non-users of biomass. Where biomass was used for cooking, it was also more likely to be used to heat the home.

Table 3 shows the distribution of potentially confounding risk factors for CHD in the four categories of exposure to biomass. In comparison with non-users of biomass users, slightly higher proportions of women using biomass reported having been born with 'lower than normal' birth weight, having lost weight at some time during childhood, ever having smoked, and being exposed to environmental tobacco smoke in the home.

#### *Prevalence of outcome measures*

Supplementary Table 1 shows the prevalence of the main outcome measures that were investigated. In total, 297 women (35%) were classed as having hypertension, two thirds of whom were taking regular medication for blood pressure. About 27% had symptoms indicative of angina based on Rose's questionnaire. Fifty-four (6.4%) reported a previous history of heart attack, and 19% of women had findings of definite or probable CHD on ECG.

#### *Validity of ECG classification and interrelationships of outcome measures:*

Supplementary Table 2 compares the classification of ECGs by the two observers. Satisfactory ECG traces were obtained for 841 (98.9%) of the participants, but four were missing from the file used to assess inter-observer agreement, and were later assessed jointly by the two observers. The overall agreement between the two observers was 85.2% ( $\kappa = 0.57$ ). Most disagreements were related to cases in which the exceedance of a threshold in, for example, ST elevation, ST depression or the width (duration) of a Q wave was borderline. In some cases, it was questionable whether there was a small R wave or a QS pattern. Also, there was some disagreement about whether T waves were negative or flat. Following discussion between the two observers, all of the discrepancies were reconciled, and it was finally agreed that 181 women (21.5%) showed changes indicative of definite or probable CHD. However, in 22 of these cases, it appeared that the abnormality had occurred only because the ECG leads had been placed incorrectly, and those traces were reclassified as normal. Thus in further analyses, 159 (19%) of women were considered to have definite or probable CHD on ECG.

Supplementary Table 3 shows the prevalence of definite or probable CHD on ECG according to symptoms of angina and history of heart attack. It was somewhat more frequent in participants who reported an earlier heart attack (26%) than in those who did not and had no symptoms of angina (18%). However, there was no association with angina in the absence of heart attack.

#### *Association of outcome measures with use of biomass and other risk factors*

Associations of hypertension and the three CHD outcomes (angina, heart attack and definite or probable CHD on ECG) with potential risk factors are presented in Supplementary Tables 4 to 7, from which the risk estimates for use of biomass fuel for cooking are summarized in Table 4. The first column of each table gives odds ratios adjusted only for age, while the second column presents mutually adjusted risk estimates from a single model that included use of biomass and all of the risk factors that showed associations ( $p \leq 0.1$ ) in the analyses adjusted only for age. The last column shows findings from a similar analysis but restricted to women who were long-term users or non-users of biomass.

In analyses that adjusted only for age, hypertension was associated ( $p \leq 0.1$ ) with older age, a higher number of household assets, higher frequency of consuming meat and eggs, and having a high BMI or WHR (Supplementary Table 4). When these variables were carried forward to the mutually adjusted analysis, the association with consumption of meat and eggs was diminished, but the others remained. Thus, the risk of hypertension increased 40% with every 10-year increase in age, was 2.3 times higher in women with  $\geq 4$  household assets than in those with 0 or 1, and was increased 1.9-fold in women who had both high BMI and high WHR as compared with those in whom neither BMI nor WHR were elevated. However, hypertension was not associated with use of biomass (OR 1.0 in the fully adjusted model). When analysis was restricted to long-term users and non-users of biomass, results were similar, with an OR of 1.1 for long-term use of biomass.

In analyses that adjusted only for age, the odds of angina increased with age and regular smoking, and were significantly lower with more frequent consumption of meat and eggs (Supplementary Table 5). Moreover, this pattern was maintained when risk estimates were mutually adjusted. Thus, the odds of angina increased by 30% per 10-year increase in age, and with ever having smoked regularly (OR 2.0, 95%CI 1.2-3.2), and were significantly lower in women who ate both meat and eggs at least once per week (OR 0.5, 95%CI 0.3-0.7). There was, however, no association with use of biomass (OR 1.0, 95%CI 0.8-1.4). When analysis was restricted to long-term users and non-users of biomass, results were similar except that there was a suggestion of a weak association with exposure to biomass (OR 1.3, 95%CI 0.9-1.9).

In corresponding analyses with previous history of heart attack (diagnosed by a physician) as an outcome, initial models with adjustment only for age indicated associations ( $p < 0.1$ ) with age, higher household income, higher number of household assets, and high BMI or WHR (Supplementary Table 6). After mutual adjustment, age remained a significant risk factor (OR 1.5, 95%CI 1.2-2.0, for each 10-year increase in age). However, the other associations, although still positive, were not significant at a 5% level. Nor was there an association with use of biomass for cooking (OR 1.2, 95%CI 0.7-2.2). In the mutually adjusted model for long-term use of biomass, results were very similar.

In analyses adjusted only for age, household income was the only variable significantly associated with definite or probable CHD on ECG, and it remained significant in the fully adjusted model (OR 1.6, 95%CI 1.1-2.4 for household income  $> 10,000$ PKR) (Supplementary Table 7). However, there was no association with use of biomass for cooking, either overall or in the long-term (ORs 0.8 and 0.9).

## Discussion

This study found no association between use of biomass fuel and any of the four outcomes studied (hypertension, angina, previous history of heart attack, and definite or probable CHD on ECG), even when comparison was with women who had not used biomass for at least the last 10 years. The strongest hint of an association was for angina in long-term users as compared with long-term non-users of biomass, but the elevation of risk was small (30%) and not statistically significant at a 5% level.

The choice of villages from which to recruit participants ensured a balance in the fuels currently used for cooking, and cooperation in the survey was good with high response rates from the households and women that were invited to take part. Inevitably, recruitment was to some extent opportunistic and limited to one province of Pakistan. However, there seems no reason to expect that the study sample would have been seriously unrepresentative in the associations of hypertension and CHD with use of biomass and other risk factors.

A linked air monitoring study found that in the kitchens of houses using biomass for cooking, the mean 24-hour average  $PM_{2.5}$  concentration was  $531 \mu\text{g}/\text{m}^3$ , with a median of  $136 \mu\text{g}/\text{m}^3$  and inter-quartile range  $34\text{-}615 \mu\text{g}/\text{m}^3$  (paper in preparation). Corresponding concentrations in houses not using biomass for cooking were 69.9, 24.2, and  $13.5\text{-}53.3 \mu\text{g}/\text{m}^3$ . Thus, while individual exposures may have been influenced also by time spent cooking and whether biomass was burned in a closed or open



1  
2  
3 kitchen, the absence of associations with CHD and hypertension is unlikely to reflect inadequate  
4 contrasts in recent intensity of exposure.  
5

6 Our aim was as far as possible to recruit households that had used the same fuel for cooking  
7 exclusively for at least 10 years. Villages were selected with this criterion in mind, and it was covered  
8 in preliminary inquiries that were addressed to local community representatives. In practice, however,  
9 it turned out that where natural gas was available in villages, some participants had not yet switched  
10 to cleaner fuel, or had done so at a later date than others. A pragmatic decision was therefore made to  
11 include women even if they had changed their cooking fuel within the past 10 years, provided that  
12 they had used their current fuel for at least a year. This seemed reasonable since trials had suggested  
13 that interventions to reduce household air pollution from use of biomass for cooking can produce  
14 reductions in blood pressure and changes in ECGs over the short to medium term [39-41]. However,  
15 to check that it did not obscure associations, additional analyses were carried out with restriction to  
16 long-term users and non-users of biomass, and still no relationship was found with the health  
17 outcomes.  
18

19  
20 The sample size achieved for the study was close to that planned, and the prevalence of the four  
21 outcomes was higher than had been assumed in the power calculations. Moreover, the upper  
22 confidence limits for the odds ratios relating to use of biomass were almost all  $<2$ . Thus, the absence  
23 of associations with biomass does not reflect a lack of statistical power.  
24

25 Ascertainment of current use of biomass is likely to have been highly accurate, and while there may  
26 have been some errors in recall of the times when biomass had been used in the past, it is difficult to  
27 conceive that any resultant misclassification would have obscured important associations with CHD.  
28 Generally, switches in the use of fuel were only in one direction – towards cleaner natural gas from  
29 biomass. The timing of changes was usually well recalled because in most instances the entire village  
30 received the new source of fuel in a particular year. However, the duration of using cow dung and  
31 firewood may not always have been remembered reliably, and switches between these types of fuel  
32 could also have occurred. Many women reported using cow dung and firewood for the same duration,  
33 and no attempt was made to analyse them separately.  
34

35 Recall of some potentially confounding exposures may also have been inaccurate – particularly those  
36 pertaining to childhood. If so, the errors would be expected to be non-differential with respect to  
37 CHD, and therefore to bias risk estimates towards the null, possibly leading to uncontrolled residual  
38 confounding. However, the assessment of BMI and WHR used standardized methods, and should  
39 have been reasonably reliable. The interviewers were trained in how to make the measurements, and  
40 their technique was piloted in the field before the start of data collection.  
41

42  
43 A greater concern is the possibility of error in the ascertainment of outcomes. Blood pressure was  
44 objectively measured according to a standardized protocol, and was taken as the average of three  
45 readings. Moreover, most of the women who were classed as having hypertension were taking  
46 treatment for the disorder, which supports the validity of its assessment. Angina was determined  
47 through the well-established Rose questionnaire, but it is possible that symptoms in some cases arose  
48 from other pathology. Previous research has suggested that the Rose angina questionnaire may not be  
49 as reliable among women as in men [42]. Although the question to participants about history of heart  
50 attack referred specifically to diagnoses that had been given by a health professional, errors could  
51 have occurred in interpretation of the term “heart attack” (e.g. to include symptoms from  
52 dysrhythmias and acute heart failure as well as myocardial infarction). However, ascertainment of  
53 heart attack had been previously carried out by the same method in a similar population, where it was  
54 found to be reasonably accurate [43].  
55

56 The diagnosis of CHD from ECGs showed only a weak relationship to history of medically diagnosed  
57 heart attack, and none at all to symptoms of angina (Supplementary Table 3). Between observer  
58 agreement in the classification of ECGs was reasonably good ( $\kappa = 0.57$ ) (Supplementary Table  
59  
60

2), but it is notable that unlike angina and history of heart attack, CHD diagnosed from ECGs did not show the expected association with age (Supplementary Table 7).

To the extent that errors did occur in the ascertainment of outcomes, they are unlikely to have differed systematically in relation to use of biomass, and therefore would be expected to tend to obscure any true associations.

Because the study had a cross-sectional design, consideration must be given to the possibility of reverse causation. For risk factors related to childhood (e.g. birthweight, father's occupation and education), this is less of a concern. However, it is plausible that characteristics such as diet, physical activity and time spent cooking could have changed as a consequence of CHD. Depending on the circumstances, this might bias associations either upwards or downwards.

Another limitation of the study was that it did not determine when past heart attacks had occurred. Even if not as a consequence of an earlier heart attack, some of the exposures studied (e.g. BMI and WHR) may have changed in the interval since such an attack occurred. If so, this might obscure true associations.

A further possible source of error was uncontrolled residual confounding. To minimize this problem, information was collected about a range of potentially confounding variables, and as in most studies of biomass fuel, socio-economic status tended to be higher in women using cleaner fuels [44]. Although several socio-economic indicators were evaluated as possible factors for adjustment, residual confounding could still have occurred. To explain the absence of associations with biomass, such confounding would have to be inverse (i.e. the under-ascertained confounder would have to be less prevalent in women who used biomass than in non-users).

The study found expected associations with several established risk factors for CHD. Thus, the odds of hypertension, angina and previous history of heart attack were all higher with older age (by 30-50% for every 10 year increase), although this was not found for definite or probable CHD on ECG. The relationship of CHD to age is well documented in the literature [45], and in women, the incidence of CHD increases rapidly after the menopause, reaching up to three times that in premenopausal women [46].

Two of the outcome measures – hypertension and previous history of heart attack – were significantly associated with affluence as measured by number of household assets. This relationship has also been observed before. In a population-based study in Pakistan, history of 'angina or heart attack' was estimated to have 3-fold higher prevalence among affluent participants than in those who were poor [47]. The direction of the association, which is the inverse of that observed in western populations, accords with a higher prevalence of diabetes, hypertension and dyslipidaemias in more educated and affluent groups, which was found in a recent study conducted in South Asian countries, including Pakistan [48].

In further support of an effect of affluence, we found that high BMI and/or WHR was associated with greater risk of hypertension, and (non-significantly) with history of heart attack. Obesity has been shown to increase the risk of hypertension in several studies [49, 50], and partly through this mechanism, also increases the risk and progression of CHD [51]. The INTERHEART study suggested that WHR (abdominal obesity) is a better marker of risk for CHD than BMI [52], but the two were correlated in our study sample, and we opted to use a combined measure.

In contrast, we found that more frequent consumption of meat and eggs was associated with reduced risk of angina. This was unexpected given the known relationship of CHD to consumption of saturated fat [53], and may have been a chance finding. It did not extend to the other outcomes investigated. However, a recent large review suggests that the relationship may be inconsistent [54].

1  
2  
3 Smoking has consistently been found to increase the risk of CHD in many studies [55]. However, in  
4 our investigation it was associated only with angina. This might be because intensity of tobacco use  
5 among female smokers in the Pakistani population is low [56].  
6

7 Despite the finding of several expected associations, the failure to demonstrate more consistent  
8 relationships to known risk factors is a further indication for caution in the interpretation of our  
9 results.  
10

11 Several earlier studies have indicated links between use of biomass for cooking and CHD, although  
12 the finding has not been entirely consistent [17,18]. As already discussed, one explanation for our  
13 failure to demonstrate such associations in the current study could be inaccuracies in the diagnosis of  
14 CHD. Another possibility, however, is that adverse effects of exposure to pollutants from the use of  
15 biomass persist many years after last exposure. In this survey, even among women who had not used  
16 biomass during the last 10 years, most had done so earlier, and often for a long time. Only a few  
17 participants (about 3.5% overall) had never used biomass, which was too few for meaningful risk  
18 estimates. While it would be possible to compare rural users of biomass with lifelong users of cleaner  
19 fuels in urban settings, interpretation would be complicated by other important differences between  
20 those living in rural and urban areas.  
21  
22

### 23 **Conclusions**

24 This study evaluated the association of hypertension and three measures of CHD – angina, previous  
25 history of heart attack and definite or probable CHD on ECG - with use of biomass for cooking. We  
26 found no clear associations with any of the health outcomes. However, the weak relationship of ECG  
27 abnormalities to the other two measures of CHD, and the inconsistency of their associations with  
28 well-established risk factors, suggest that this could have been because of diagnostic misclassification.  
29 Alternatively, it could be that an effect was missed because most of the women who were not  
30 currently using biomass for cooking had used it in the past, and risk remains elevated for many years  
31 after last exposure.  
32  
33

### 34 **Data Availability**

35  
36 The data [stata.dta format] underpinning the findings of this study are available from the  
37 corresponding author upon reasonable request.  
38  
39

### 40 **Acknowledgments**

41  
42 This study reported in this paper formed part of a PhD project carried out by Dr Zafar Fatmi under the  
43 supervision of Professor David Coggon at the University of Southampton.  
44  
45

46 Mr Syed Nayab Ali Shah coordinated the data collection. Ms Shereen Jamali, Ms Fozia Jamali, Ms  
47 Iqra Memon and Ms Sana Memon administered the questionnaires at interview and recorded the  
48 ECGs. We are grateful also to Professor Keith Palmer and Professor M. Masood Kadir for their  
49 advice on various aspects of the study.  
50  
51  
52  
53  
54  
55  
56  
57  
58  
59  
60

## References

1. Bonjour S, Adair-Rohani H, Wolf J, Bruce NG, Mehta S, Prüss-Ustün A, Lahiff M, Rehfuess EA, Mishra V, Smith KR. Solid fuel use for household cooking: country and regional estimates for 1980-2010. *Environ Health Perspect*. 2013;121:784-90.
2. World Health Organization. Household air pollution and health. Geneva, Switzerland. (Accessed on 4 April 2018). <http://www.who.int/mediacentre/factsheets/fs292/en/>
3. World Health Organization. Ambient (outdoor) air quality and health [Internet]. Geneva; 2018 [updated 2 May 2018]. Available from: [https://www.who.int/news-room/fact-sheets/detail/ambient-\(outdoor\)-air-quality-and-health](https://www.who.int/news-room/fact-sheets/detail/ambient-(outdoor)-air-quality-and-health)
4. Naeher LP, Brauer M, Lipsett M, Zelikoff JT, Simpson CD, Koenig JQ, et al. [Woodsmoke health effects: a review](#). *Inhal Toxicol*. 2007;19(1):67-106. Review.
5. Clark ML, Peel JL, Balakrishnan K, Breyse PN, Chilrud SN, Naeher LP et al. [Health and household air pollution from solid fuel use: the need for improved exposure assessment](#). *Environ Health Perspect* 2013;121:1120-8.
6. Smith KR, Samet JM, Romieu I, Bruce N. Indoor air pollution in developing countries and acute lower respiratory infections in children. *Thorax*. 2000 Jun;55(6):518-32.
7. Smith KR, Mehta S, Maeusezahl-Feuz M. Indoor air pollution from household use of solid fuels: comparative quantification of health risks. In: Ezzati MLA, Rodgers A, Murray CJL, editors. *Global and regional burden of disease attributable to selected major risk factors*. Geneva, Switzerland: World Health Organization; 2004. pp. 1435–1493.
8. Torres-Duque C, Maldonado D, Pérez-Padilla R, Ezzati M, Viegi G; Forum of International Respiratory Studies (FIRS) Task Force on Health Effects of Biomass Exposure. Biomass fuels and respiratory diseases: a review of the evidence. *Proc Am Thorac Soc*. 2008 Jul 15;5(5):577-90.
9. Liu Y, Lee K, Perez-Padilla R, Hudson NL, Mannino DM. Outdoor and indoor air pollution and COPD-related diseases in high- and low-income countries. *Int J Tuberc Lung Dis*. 2008;12(2):115-27.
10. Kurmi OP, Semple S, Simkhada P, Smith WC, Ayres JG. COPD and chronic bronchitis risk of indoor air pollution from solid fuel: a systematic review and meta-analysis. *Thorax*. 2010; 65(3):221-8.
11. Liu Q, Sasco AJ, Riboli E et al. Indoor air pollution and lung cancer in Guangzhou, People's Republic of China. *Am. J. Epidemiol*. 1993; 137: 145–54.
12. Kleinerman R, Wang Z, Lubin J, Zhang S, Metayer C, Brenner A. Lung cancer and indoor air pollution in rural china. *Ann Epidemiol*. 2000;10(7):469.
13. Behera D, Balamugesh T. Indoor air pollution as a risk factor for lung cancer in women. *J Assoc Physicians India*. 2005; 53:190-2.
14. Amegah AK, Quansah R, Jaakkola JJ. Household air pollution from solid fuel use and risk of adverse pregnancy outcomes: a systematic review and meta-analysis of the empirical evidence. *PloS one*. 2014 Dec 2;9(12):e113920.
15. Lamichhane DK, Leem JH, Lee JY, Kim HC. A meta-analysis of exposure to particulate matter and adverse birth outcomes. *Environ Health Toxicol*. 2015 Nov 3;30:e2015011.
16. Calderón-Garcidueñas L, Torres-Jardón R, Kulesza RJ, Park SB, D'Angiulli A. Air pollution and detrimental effects on children's brain. The need for a multidisciplinary approach to the issue complexity and challenges. *Front Hum Neurosci*. 2014; 8:613.
17. Fatmi Z, Coggon D. Coronary heart disease and household air pollution from use of solid fuel: a systematic review. *Br Med Bull*. 2016 Jun;118(1):91-109.

18. Yu K, Qui G, Chan K-H, Lam K-BH, Kurmi OP, Bennett DA et al. Association of solid fuel use with risk of cardiovascular and all-cause mortality in rural China. *JAMA* 2018;319:1351-61.
19. Sathiakumar N. Indoor air pollution due to biomass fuel use and acute coronary syndrome among Sri Lankan women. *Epidemiology* 2012;23:S224.
20. Fatmi Z, Coggon D, Kazi A, Naeem I, Kadir MM, Sathiakumar N. Solid fuel use is a major risk factor for acute coronary syndromes among rural women: a matched case control study. *Public Health*. 2014 Jan;128(1):77-82. doi: 10.1016/j.puhe.2013.09.005.
21. Kim C, Shu X-O, Hosgood HD, et al. Past use of coal for cooking is associated with all-cause mortality in the prospective Shanghai women's health study. *Cancer Res* 2014;74:Abstract nr 2184.
22. Lee M-S, Hang J-Q, Zhang F-Y, et al. In-home solid fuel use and cardiovascular disease: a cross-sectional analysis of the Shanghai Putuo study. *Environ Health* 2012;11:18.
23. Mitter SS, Islami F, Pourshams A, et al. Use of biomass fuels for cooking and heating is associated with increased non-communicable disease mortality: Golestan cohort study. *Circulation* 2012;125:AP042.
24. Alam DS, Chowdhury MAH, Siddiquee AT, et al. Adult cardiopulmonary mortality and indoor air pollution: a 10-year retrospective cohort study in a low-income rural setting. *Glob Heart* 2012;7:215-21.
25. Baumgartner J, Schauer JJ, Ezzati M, et al. Indoor air pollution and blood pressure in adult women living in rural China. *Environ Health Perspect* 2011;119:1390-5.
26. Painschab MS, Davila-Roman VG, Gilman RH, et al. Chronic exposure to biomass fuel is associated with increased carotid artery intima-media thickness and a higher prevalence of atherosclerotic plaque. *Heart* 2013;99:984-91.
27. Burroughs Peña M, Romero KM, Velazquez EJ, et al. Relationship between daily exposure to biomass fuel smoke and blood pressure in high-altitude Peru. *Hypertension* 2015;65:1134-40.
28. Neupane M, Basnyat B, Fischer R, et al. Sustained use of biogas fuel and blood pressure among women in rural Nepal. *Environ Res* 2015;136: 343-51.
29. Ray MR, Mukherjee S, Roychoudhury S, et al. Platelet activation, upregulation of CD11b/CD18 expression on leukocytes and increase in circulating leukocyte-platelet aggregates in Indian women chronically exposed to biomass smoke. *Hum Exp Toxicol* 2006;25:627-35.
30. Dutta A, Mukherjee B, Das D, et al. Hypertension with elevated levels of oxidized low-density lipoprotein and anticardiolipin antibody in the circulation of premenopausal Indian women chronically exposed to biomass smoke during cooking. *Indoor Air* 2011;21: 165-76.
31. Dutta A, Ray MR, Banerjee A. Systemic inflammatory changes and increased oxidative stress in rural Indian women cooking with biomass fuels. *Toxicol Appl Pharmacol* 2012;261:255-62.
32. Davutoglu V, Zengin S, Sari I, et al. Chronic carbon monoxide exposure is associated with the increases in carotid intima-media thickness and C-reactive protein level. *Tohoku J Exp Med* 2009;219:201-6.
33. Clark ML, Bazemore H, Reynolds SJ, et al. A baseline evaluation of traditional cook stove smoke exposures and indicators of cardiovascular and respiratory health among Nicaraguan women. *Int J Occup Environ Health* 2011;17:113-21.
34. Rose G, McCartney P, Reid DD. Self-administration of a questionnaire on chest pain and intermittent claudication. *Br J Prev Soc Med*. 1977; 31:42-48.



- 1
  - 2
  - 3
  - 4
  - 5
  - 6
  - 7
  - 8
  - 9
  - 10
  - 11
  - 12
  - 13
  - 14
  - 15
  - 16
  - 17
  - 18
  - 19
  - 20
  - 21
  - 22
  - 23
  - 24
  - 25
  - 26
  - 27
  - 28
  - 29
  - 30
  - 31
  - 32
  - 33
  - 34
  - 35
  - 36
  - 37
  - 38
  - 39
  - 40
  - 41
  - 42
  - 43
  - 44
  - 45
  - 46
  - 47
  - 48
  - 49
  - 50
  - 51
  - 52
  - 53
  - 54
  - 55
  - 56
  - 57
  - 58
  - 59
  - 60
35. Prineas RJ, Crow RS, Zhang Z-h. The Minnesota code manual of electrocardiographic findings. 2nd Edition. London. Springer London; 2010.
36. Christiansen TB and Lauritsen JM. (Ed.) EpiData - Comprehensive Data Management and Basic Statistical Analysis System. Odense Denmark, EpiData Association, 2010-. <http://www.epidata.dk>
37. Stata Corp LP 2012, Stata Statistical Software: Release 12.0, College Station TX, USA.
38. Jafar TH, Qadri Z, Chaturvedi N. Coronary artery disease epidemic in Pakistan: more electrocardiographic evidence of ischaemia in women than in men. *Heart*. 2008;94(4):408-13.
39. McCracken J, Smith KR, Stone P, Diaz A, Arana B, Schwartz J. Intervention to lower household wood smoke exposure in Guatemala reduces ST-segment depression on electrocardiograms. *Environ Health Perspect* 2011;119:1562-8.
40. McCracken JP, Smith KR, Diaz A, Mittleman MA, Schwartz J. Chimney stove intervention to reduce long-term wood smoke exposure lowers blood pressure among Guatemalan women. *Environ Health Perspect* 2007;115:996-1001.
41. Alexander D, Larson T, Bolton S, Vedal S. Systolic blood pressure changes in indigenous Bolivian women associated with an improved cookstove intervention. *Air Qual Atmos Health* 2015;8:47-53.
42. Wilcosky T, Harris R, Weissfeld L. The prevalence and correlates of Rose questionnaire angina among women and men in the Lipid Research Clinics Program Prevalence Study. *Am J Epidemiol*. 1987;125 (3):400-409.
43. Jafar TH, Jafary FH, Jessani S, Chaturvedi N. Heart disease epidemic in Pakistan: women and men at equal risk. *Am Heart J*. 2005;150(2):221-6.
44. Khushk WA, Fatmi Z, White F, Kadir MM. Health and social impacts of improved stoves on rural women: a pilot intervention in Sindh, Pakistan. *Indoor Air*. 2005 Oct;15(5):311-6.
45. Castelli WP. Epidemiology of coronary heart disease: The Framingham study. *American Journal of Medicine* 1984, page 4.
46. Gordon T, Kannel WB, Hjortland MC, McNamara PM. Menopause and coronary heart disease. The Framingham Study. *Ann Intern Med*. 1978; 89:157-61.
47. Hameed K, Kadir M, Gibson T, Sultana S, Fatima Z, Syed A. The frequency of known diabetes, hypertension and ischaemic heart disease in affluent and poor urban populations of Karachi, Pakistan. *Diabet Med*. 1995;12(6):500-3.
48. Ali MK, Bhaskarapillai B, Shivashankar R, Mohan D, Fatmi Z, Pradeepa R, Masood Kadir M, Mohan V, Tandon N, Narayan KM, Prabhakaran D; CARRS investigators. Socioeconomic status and cardiovascular risk in urban South Asia: The CARRS Study. *Eur J Prev Cardiol*. 2016 Mar;23(4):408-19.
49. Hubert HB, Feinleib M, McNamara PM, Castelli WP. Obesity as an independent risk factor for cardiovascular disease: a 26-year follow-up of participants in the Framingham Heart Study. *Circulation* 1983; 67:968-77.
50. Todd Miller M, Lavie CJ, White CJ. Impact of obesity on the pathogenesis and prognosis of coronary heart disease. *J Cardiometab Syndrome* 2008; 3:162-7.
51. Prospective Studies Collaboration. Age-specific relevance of usual blood pressure to vascular mortality: a meta-analysis of individual data for one million adults in 61 prospective studies. *Lancet*. 2002;360: 1903-13.
52. Yusuf S, Hawken S, Ounpuu S, Bautista L, Franzosi MG, Commerford P, Lang CC, Rumboldt Z, Onen CL, Lisheng L, Tanomsup S, Wangai P Jr, Razak F, Sharma AM, Anand SS; INTERHEART Study Investigators. Obesity and the risk of myocardial

- 1  
2  
3 infarction in 27,000 participants from 52 countries: a case-control study. *Lancet*  
4 2005;366(9497):1640-9.  
5  
6 53. The World Health Report 2002: reducing risks, promoting healthy life. Geneva,  
7 World Health Organization, 2002.  
8  
9 54. Chowdhury R, Warnakula S, Kunutsor S, Crowe F, Ward HA, Johnson L, Franco  
10 OH, Butterworth AS, Forouhi NG, Thompson SG, Khaw KT, Mozaffarian D, Danesh  
11 J, Di Angelantonio E. Association of dietary, circulating, and supplement fatty acids  
12 with coronary risk: a systematic review and meta-analysis. *Ann Intern Med.* 2014 Mar  
13 18;160(6):398-406. doi: 10.7326/M13-1788.  
14  
15 55. Huxley RR, Woodward, M. Cigarette smoking as a risk factor for coronary heart  
16 disease in women compared with men: a systematic review and meta-analysis of  
17 prospective cohort studies. *Lancet.* 2011;378(9799):1297-305.  
18  
19 56. Global Adult Tobacco Survey. Pakistan Fact sheet 2014.  
20 <http://www.who.int/tobacco/surveillance/survey/gats/pakfactsheet.pdf>  
21  
22  
23  
24  
25  
26  
27  
28  
29  
30  
31  
32  
33  
34  
35  
36  
37  
38  
39  
40  
41  
42  
43  
44  
45  
46  
47  
48  
49  
50  
51  
52  
53  
54  
55  
56  
57  
58  
59  
60



**Table 1.** Demographic and socioeconomic characteristics of participants by exposure category.

| Characteristic                          | All women (n=850) |        | Users of biomass (n=436) |        | Non-users of biomass (n=414) |        | Long-term users of biomass (n=430) |        | Long-term non-users of biomass (n=263) |        |
|-----------------------------------------|-------------------|--------|--------------------------|--------|------------------------------|--------|------------------------------------|--------|----------------------------------------|--------|
|                                         | <i>N</i>          | (%)    | <i>n</i>                 | (%)    | <i>n</i>                     | (%)    | <i>n</i>                           | (%)    | <i>n</i>                               | (%)    |
| <b>Age (years)</b>                      |                   |        |                          |        |                              |        |                                    |        |                                        |        |
| <50                                     | 525               | (61.8) | 263                      | (60.3) | 262                          | (63.3) | 257                                | (59.8) | 166                                    | (63.1) |
| ≥50                                     | 325               | (38.2) | 173                      | (39.7) | 152                          | (36.7) | 173                                | (40.2) | 97                                     | (36.9) |
| <b>Educational status</b>               |                   |        |                          |        |                              |        |                                    |        |                                        |        |
| No literacy                             | 797               | (93.8) | 419                      | (96.1) | 378                          | (91.3) | 413                                | (96.1) | 239                                    | (90.9) |
| Any literacy                            | 53                | (6.2)  | 17                       | (3.9)  | 36                           | (8.7)  | 17                                 | (4.0)  | 24                                     | (9.1)  |
| <b>Household income/month</b>           |                   |        |                          |        |                              |        |                                    |        |                                        |        |
| ≤10000PKR                               | 651               | (76.6) | 351                      | (80.5) | 300                          | (72.5) | 347                                | (80.7) | 185                                    | (70.3) |
| >10000PKR                               | 199               | (23.4) | 85                       | (19.5) | 114                          | (27.5) | 83                                 | (19.3) | 78                                     | (29.7) |
| <b>Household tenure</b>                 |                   |        |                          |        |                              |        |                                    |        |                                        |        |
| Rented                                  | 70                | (8.2)  | 25                       | (5.7)  | 45                           | (10.9) | 25                                 | (5.8)  | 20                                     | (7.6)  |
| Owned                                   | 780               | (91.8) | 411                      | (94.3) | 369                          | (89.1) | 405                                | (94.2) | 243                                    | (92.4) |
| <b>Construction of house</b>            |                   |        |                          |        |                              |        |                                    |        |                                        |        |
| Katcha/ semi-pucca                      | 652               | (76.7) | 361                      | (82.8) | 291                          | (70.3) | 356                                | (82.8) | 173                                    | (65.8) |
| Pucca                                   | 198               | (23.3) | 75                       | (17.2) | 123                          | (29.7) | 74                                 | (17.2) | 90                                     | (34.2) |
| <b>Number of household assets</b>       |                   |        |                          |        |                              |        |                                    |        |                                        |        |
| Low (0-1)                               | 268               | (31.5) | 140                      | (32.1) | 128                          | (30.9) | 139                                | (32.3) | 84                                     | (31.9) |
| Medium (2-3)                            | 404               | (47.5) | 223                      | (51.2) | 181                          | (43.7) | 218                                | (50.7) | 108                                    | (41.1) |
| High (≥4)                               | 178               | (21.0) | 73                       | (16.7) | 105                          | (25.4) | 73                                 | (17.0) | 71                                     | (27.0) |
| <b>Father's occupation in childhood</b> |                   |        |                          |        |                              |        |                                    |        |                                        |        |
| Non-manual                              | 39                | (4.6)  | 19                       | (4.4)  | 20                           | (4.8)  | 18                                 | (4.2)  | 16                                     | (6.1)  |
| Manual                                  | 811               | (95.4) | 417                      | (95.6) | 394                          | (95.2) | 412                                | (95.8) | 247                                    | (93.9) |

**Table 2.** Current and past cooking arrangements according to exposure category.

| Characteristic                                            | Users of biomass<br>(n=436) |        | Non-users of<br>biomass<br>(n=414) |        | Long-term users<br>of biomass<br>(n=430) |        | Long-term non-users<br>of biomass<br>(n=263) |        |
|-----------------------------------------------------------|-----------------------------|--------|------------------------------------|--------|------------------------------------------|--------|----------------------------------------------|--------|
|                                                           | n                           | (%)    | n                                  | (%)    | n                                        | (%)    | n                                            | (%)    |
| <b><i>Ever used biomass for cooking</i></b>               | 436                         | (100)  | 382                                | (92.3) | 430                                      | (100)  | 231                                          | (87.8) |
| <b><i>Years since last used biomass for cooking</i></b>   |                             |        |                                    |        |                                          |        |                                              |        |
| Current user                                              | 436                         | (100)  | -                                  | -      | 430                                      | (100)  | -                                            | -      |
| 2-9                                                       | -                           | -      | 151                                | (39.5) | -                                        | -      | -                                            | -      |
| ≥10                                                       | -                           | -      | 231                                | (60.5) | -                                        | -      | 231                                          | (100)  |
| <b><i>Ever used wood for cooking</i></b>                  | 435                         | (99.8) | 358                                | (86.5) | 429                                      | (99.8) | 218                                          | (82.9) |
| <b><i>Ever used cow dung for cooking</i></b>              | 422                         | (96.8) | 358                                | (86.5) | 416                                      | (96.7) | 216                                          | (82.1) |
| <b><i>Ever used kerosene for cooking</i></b>              | 16                          | (3.7)  | 26                                 | (6.3)  | 16                                       | (3.7)  | 17                                           | (6.5)  |
| <b><i>Ever used LPG/natural gas for cooking</i></b>       | 17                          | (3.9)  | 413                                | (99.8) | 15                                       | (3.5)  | 263                                          | (100)  |
| <b><i>Average hours per day cooked in past year</i></b>   |                             |        |                                    |        |                                          |        |                                              |        |
| ≤1                                                        | 129                         | (29.6) | 133                                | (32.1) | 123                                      | (28.6) | 75                                           | (28.5) |
| 2-3                                                       | 270                         | (61.9) | 237                                | (57.3) | 270                                      | (62.8) | 165                                          | (62.7) |
| ≥4                                                        | 37                          | (8.5)  | 44                                 | (10.6) | 37                                       | (8.6)  | 23                                           | (8.8)  |
| <b><i>Type of stove used for cooking</i></b>              |                             |        |                                    |        |                                          |        |                                              |        |
| Gas/LPG                                                   | 2                           | (0.5)  | 414                                | (100)  | 2                                        | (0.5)  | 263                                          | (100)  |
| Biomass with chimney/improved stove                       | 166                         | (38.1) | -                                  | -      | 164                                      | (38.1) | -                                            | -      |
| Biomass with three brick open stove                       | 267                         | (61.2) | -                                  | -      | 263                                      | (61.2) | -                                            | -      |
| Other                                                     | 1                           | (0.2)  | -                                  | -      | 1                                        | (0.2)  | -                                            | -      |
| <b><i>Type of kitchen</i></b>                             |                             |        |                                    |        |                                          |        |                                              |        |
| Closed (four walls – linked with living room or separate) | 88                          | (20.2) | 116                                | (28.0) | 86                                       | (20.0) | 79                                           | (30.0) |
| Semi-open (fewer than four walls)                         | 189                         | (43.3) | 155                                | (37.4) | 187                                      | (43.5) | 94                                           | (35.7) |
| Open (no walls)                                           | 159                         | (36.5) | 143                                | (34.5) | 157                                      | (36.5) | 90                                           | (34.2) |
| <b><i>Heat home with biomass</i></b>                      | 237                         | (54.4) | 106                                | (25.6) | 236                                      | (54.9) | 74                                           | (28.1) |

**Table 3.** Distribution of risk factors across the four exposure categories.

| Characteristic                                                                                                        | Users of biomass (n=436) |        | Non-users of biomass (n=414) |        | Long-term users of biomass (n=430) |        | Long-term non-users of biomass (n=263) |        |
|-----------------------------------------------------------------------------------------------------------------------|--------------------------|--------|------------------------------|--------|------------------------------------|--------|----------------------------------------|--------|
|                                                                                                                       | n                        | (%)    | n                            | (%)    | n                                  | (%)    | n                                      | (%)    |
| <b>Birthweight</b>                                                                                                    |                          |        |                              |        |                                    |        |                                        |        |
| Lower than normal                                                                                                     | 117                      | (26.8) | 77                           | (18.6) | 114                                | (26.5) | 54                                     | (20.5) |
| Normal                                                                                                                | 239                      | (54.8) | 254                          | (61.4) | 237                                | (55.1) | 156                                    | (59.3) |
| Higher than normal                                                                                                    | 80                       | (18.4) | 83                           | (20.0) | 79                                 | (18.4) | 53                                     | (20.2) |
| <b>Ever hungry all the time during childhood because there was not enough food</b>                                    |                          |        |                              |        |                                    |        |                                        |        |
| No                                                                                                                    | 176                      | (40.4) | 176                          | (42.5) | 175                                | (40.7) | 122                                    | (46.4) |
| Yes                                                                                                                   | 260                      | (59.6) | 238                          | (57.5) | 255                                | (59.3) | 141                                    | (53.6) |
| <b>Lost weight during childhood</b>                                                                                   |                          |        |                              |        |                                    |        |                                        |        |
| No                                                                                                                    | 162                      | (37.2) | 182                          | (44.0) | 160                                | (37.2) | 119                                    | (45.2) |
| Yes                                                                                                                   | 274                      | (62.8) | 232                          | (56.0) | 270                                | (62.8) | 144                                    | (54.8) |
| <b>Ever smoked regularly (any of cigarettes, bidi, huqqa)</b>                                                         |                          |        |                              |        |                                    |        |                                        |        |
| Never                                                                                                                 | 390                      | (89.4) | 378                          | (91.3) | 384                                | (89.3) | 240                                    | (91.3) |
| Ever                                                                                                                  | 46                       | (10.6) | 36                           | (8.7)  | 46                                 | (10.7) | 23                                     | (8.7)  |
| <b>Environmental tobacco smoke (at least one other household member smoked cigarettes, bidi or huqqa in the home)</b> |                          |        |                              |        |                                    |        |                                        |        |
| No                                                                                                                    | 269                      | (61.7) | 267                          | (64.5) | 265                                | (61.6) | 173                                    | (65.8) |
| Yes                                                                                                                   | 167                      | (38.3) | 147                          | (35.5) | 165                                | (38.4) | 90                                     | (34.2) |
| <b>Physical activity score</b>                                                                                        |                          |        |                              |        |                                    |        |                                        |        |
| 0-2                                                                                                                   | 124                      | (28.4) | 205                          | (49.5) | 124                                | (28.8) | 149                                    | (56.7) |
| 3-4                                                                                                                   | 199                      | (45.6) | 156                          | (37.7) | 196                                | (45.6) | 91                                     | (34.6) |
| 5-6                                                                                                                   | 113                      | (25.9) | 53                           | (12.8) | 110                                | (25.6) | 23                                     | (8.7)  |
| <b>Consumption of meat or eggs</b>                                                                                    |                          |        |                              |        |                                    |        |                                        |        |
| Do not eat either meat or eggs as much as once per week                                                               | 173                      | (39.7) | 142                          | (34.3) | 172                                | (40.0) | 88                                     | (33.5) |
| Eat one of meat or eggs as much as once per week                                                                      | 176                      | (40.4) | 163                          | (39.4) | 173                                | (40.2) | 100                                    | (38.0) |
| Eat both meat and eggs at least once per week                                                                         | 87                       | (20.0) | 109                          | (26.3) | 85                                 | (19.8) | 75                                     | (28.5) |
| <b>Current nutrition<sup>a</sup></b>                                                                                  |                          |        |                              |        |                                    |        |                                        |        |
| Neither BMI nor WHR high                                                                                              | 183                      | (42.0) | 129                          | (31.2) | 179                                | (41.6) | 79                                     | (30.0) |
| One of BMI or WHR high                                                                                                | 151                      | (34.6) | 160                          | (38.7) | 149                                | (34.7) | 101                                    | (38.4) |
| Both BMI and WHR high                                                                                                 | 102                      | (23.4) | 124                          | (30.0) | 102                                | (23.7) | 82                                     | (31.2) |
| Not known                                                                                                             | 0                        | (0)    | 1                            | (0.2)  | 0                                  | (0)    | 1                                      | (0.4)  |

<sup>a</sup>BMI (kg/m<sup>2</sup>) ≥25= high; WHR ≥0.85=high.

**Table 4.** Associations of hypertension, angina, history of heart attack, and definite or probable CHD on ECG with current and long-term use of biomass for cooking.

| Outcome                                | Adjusted only for age (n=850) |           | Fully adjusted <sup>a</sup> (n=850) |           | Fully adjusted and limited to long-term users and non-users of biomass <sup>b</sup> (n=693) |           |
|----------------------------------------|-------------------------------|-----------|-------------------------------------|-----------|---------------------------------------------------------------------------------------------|-----------|
|                                        | OR                            | (95%CI)   | OR                                  | (95% CI)  | OR                                                                                          | (95% CI)  |
| <b>Hypertension</b>                    |                               |           |                                     |           |                                                                                             |           |
| Non-users of biomass                   | 1.0                           |           | 1.0                                 |           | 1.0                                                                                         |           |
| Users of biomass                       | 1.2                           | (0.9-1.5) | 1.0                                 | (0.8-1.4) | 1.1                                                                                         | (0.8-1.6) |
| <b>Angina</b>                          |                               |           |                                     |           |                                                                                             |           |
| Non-users of biomass                   | 1.0                           |           | 1.0                                 |           | 1.0                                                                                         |           |
| Users of biomass                       | 1.0                           | (0.7-1.3) | 1.0                                 | (0.8-1.4) | 1.3                                                                                         | (0.9-1.9) |
| <b>Heart Attack</b>                    |                               |           |                                     |           |                                                                                             |           |
| Non-users of biomass                   | 1.0                           |           | 1.0                                 |           | 1.0                                                                                         |           |
| Users of biomass                       | 1.4                           | (0.8-2.4) | 1.2                                 | (0.7-2.2) | 1.3                                                                                         | (0.7-2.4) |
| <b>Definite or probable CHD on ECG</b> |                               |           |                                     |           |                                                                                             |           |
| Non-users of biomass                   | 1.0                           |           | 1.0                                 |           | 1.0                                                                                         |           |
| Users of biomass user                  | 0.8                           | (0.6-1.2) | 0.8                                 | (0.6-1.2) | 0.9                                                                                         | (0.6-1.3) |

<sup>a</sup>Mutually adjusted risk estimates derived from a single regression model that included use of biomass and all of the variables that were significant ( $p < 0.1$ ) in analyses adjusted only for age

<sup>b</sup>Mutually adjusted risk estimates derived from a single regression model that included use of biomass and all of the variables that were significant ( $p < 0.1$ ) in analyses adjusted only for age, but was restricted to women who were long-term users or non-users of biomass

## Supplementary Materials

**Supplementary Table 1.** Prevalence of hypertension, history of heart attack, angina and coronary heart disease in study sample.

| Characteristic                                       | n   | (%)    |
|------------------------------------------------------|-----|--------|
| <b>Hypertension</b>                                  |     |        |
| Systolic hypertension (systolic BP $\geq$ 140 mmHg)  | 133 | (15.8) |
| Diastolic hypertension (diastolic BP $\geq$ 90 mmHg) | 102 | (12.1) |
| Regular medication for high blood pressure           | 198 | (23.5) |
| Hypertension (any of the above)                      | 297 | (35.3) |
| <b>Angina</b>                                        | 227 | (27.0) |
| <b>History of heart attack</b>                       | 54  | (6.4)  |
| <b>Definite or probable CHD on ECG<sup>a</sup></b>   | 159 | (18.9) |

<sup>a</sup>Based on 841 women. ECGs for 9 women were missing or could not be coded due to poor quality.

**Supplementary Table 2.** Classification of ECGs for definite or probable CHD by two observers.

| <b>Observer 1</b> | <b>Observer 2</b> |                 |
|-------------------|-------------------|-----------------|
|                   | <b>Negative</b>   | <b>Positive</b> |
| <b>Negative</b>   | 591               | 30              |
| <b>Positive</b>   | 94                | 122             |

**Kappa = 0.57**

For peer review only

**Supplementary Table 3.** Prevalence of definite or probable CHD changes on ECG according to history of heart attack and angina.

| Other measure of CHD                 | Definite or probable CHD changes on ECG <sup>a</sup> |        |     |        |
|--------------------------------------|------------------------------------------------------|--------|-----|--------|
|                                      | Yes                                                  |        | No  |        |
|                                      | n                                                    | (%)    | N   | (%)    |
| No history of heart attack or angina | 105                                                  | (18.2) | 471 | (81.8) |
| History of angina                    | 45                                                   | (19.8) | 182 | (80.2) |
| History of heart attack              | 14                                                   | (25.9) | 40  | (74.1) |
| History of angina or heart attack    | 54                                                   | (20.4) | 211 | (79.6) |
| History of angina and heart attack   | 5                                                    | (31.3) | 11  | (68.8) |

<sup>a</sup>ECGs for 9 women were missing or could not be coded due to poor quality.



**Supplementary Table 4.** Association of hypertension with risk factors.

| Risk factor                                                                                                                       | Adjusted only<br>for age<br>(n=850) |           | Fully adjusted <sup>a</sup><br>(n=850) |           | Fully adjusted and<br>limited to long-<br>term users and<br>non-users of<br>biomass <sup>b</sup><br>(n=693) |           |
|-----------------------------------------------------------------------------------------------------------------------------------|-------------------------------------|-----------|----------------------------------------|-----------|-------------------------------------------------------------------------------------------------------------|-----------|
|                                                                                                                                   | OR                                  | (95%CI)   | OR                                     | (95%CI)   | OR                                                                                                          | (95%CI)   |
| <b>Age (per 10 year increase)</b>                                                                                                 | 1.4                                 | (1.2-1.6) | 1.4                                    | (1.2-1.7) | 1.5                                                                                                         | (1.2-1.7) |
| <b>Educational status</b>                                                                                                         |                                     |           |                                        |           |                                                                                                             |           |
| Illiterate                                                                                                                        | 1.0                                 |           | -                                      |           | -                                                                                                           |           |
| Any literacy                                                                                                                      | 0.6                                 | (0.3-1.2) |                                        |           |                                                                                                             |           |
| <b>Household income/month</b>                                                                                                     |                                     |           |                                        |           |                                                                                                             |           |
| <3000-10000PKR                                                                                                                    | 1.0                                 |           | -                                      |           | -                                                                                                           |           |
| >10000PKR                                                                                                                         | 1.0                                 | (0.7-1.4) |                                        |           |                                                                                                             |           |
| <b>Household ownership</b>                                                                                                        |                                     |           |                                        |           |                                                                                                             |           |
| Rented                                                                                                                            | 1.0                                 |           | -                                      |           | -                                                                                                           |           |
| Own                                                                                                                               | 0.8                                 | (0.5-1.3) |                                        |           |                                                                                                             |           |
| <b>Construction of house</b>                                                                                                      |                                     |           |                                        |           |                                                                                                             |           |
| Katcha/semi-pucca                                                                                                                 | 1.0                                 |           | -                                      |           | -                                                                                                           |           |
| Pucca                                                                                                                             | 0.9                                 | (0.6-1.2) |                                        |           |                                                                                                             |           |
| <b>Number of household assets</b>                                                                                                 |                                     |           |                                        |           |                                                                                                             |           |
| 0-1                                                                                                                               | 1.0                                 |           | 1.0                                    |           | 1.0                                                                                                         |           |
| 2-3                                                                                                                               | 1.7                                 | (1.2-2.4) | 1.6                                    | (1.2-2.3) | 1.8                                                                                                         | (1.2-2.6) |
| ≥4                                                                                                                                | 2.4                                 | (1.6-3.6) | 2.3                                    | (1.5-3.4) | 2.7                                                                                                         | (1.7-4.3) |
| <b>Father's occupation in woman's<br/>childhood</b>                                                                               |                                     |           |                                        |           |                                                                                                             |           |
| Non-manual                                                                                                                        | 1.0                                 |           | -                                      |           | -                                                                                                           |           |
| Manual                                                                                                                            | 1.2                                 | (0.6-2.5) |                                        |           |                                                                                                             |           |
| <b>Birthweight</b>                                                                                                                |                                     |           |                                        |           |                                                                                                             |           |
| Lower than normal                                                                                                                 | 1.0                                 |           | -                                      |           | -                                                                                                           |           |
| Normal                                                                                                                            | 1.0                                 | (0.7-1.4) | -                                      |           | -                                                                                                           |           |
| Higher than normal                                                                                                                | 1.0                                 | (0.6-1.5) |                                        |           |                                                                                                             |           |
| <b>Ever hungry during all the time<br/>during childhood because there<br/>was not enough food</b>                                 |                                     |           |                                        |           |                                                                                                             |           |
| No                                                                                                                                | 1.0                                 |           | -                                      |           | -                                                                                                           |           |
| Yes                                                                                                                               | 0.9                                 | (0.7-1.3) |                                        |           |                                                                                                             |           |
| <b>Lost weight during childhood</b>                                                                                               |                                     |           |                                        |           |                                                                                                             |           |
| No                                                                                                                                | 1.0                                 |           | -                                      |           | -                                                                                                           |           |
| Yes                                                                                                                               | 1.2                                 | (0.9-1.6) |                                        |           |                                                                                                             |           |
| <b>Ever smoked regularly (any of<br/>cigarettes, bidi, huqqa)</b>                                                                 |                                     |           |                                        |           |                                                                                                             |           |
| Never                                                                                                                             | 1.0                                 |           | -                                      |           | -                                                                                                           |           |
| Ever                                                                                                                              | 0.8                                 | (0.5-1.3) |                                        |           |                                                                                                             |           |
| <b>Environmental tobacco smoke (at<br/>least one other household member<br/>smokes cigarettes, bidi or huqqa<br/>in the home)</b> |                                     |           |                                        |           |                                                                                                             |           |
| No                                                                                                                                | 1.0                                 |           | -                                      |           | -                                                                                                           |           |
| Yes                                                                                                                               | 0.8                                 | (0.6-1.1) |                                        |           |                                                                                                             |           |
| <b>Consumption of meat or eggs</b>                                                                                                |                                     |           |                                        |           |                                                                                                             |           |

|                                                         |     |           |     |           |     |           |
|---------------------------------------------------------|-----|-----------|-----|-----------|-----|-----------|
| Do not eat either meat or eggs as much as once per week | 1.0 |           | 1.0 |           | 1.0 |           |
| Eat one of meat or eggs as much as once per week        | 1.4 | (1.0-1.9) | 1.2 | (0.9-1.7) | 1.2 | (0.8-1.7) |
| Eat both meat and eggs at least once per week           | 1.4 | (1.0-2.1) | 1.2 | (0.8-1.8) | 1.2 | (0.8-1.9) |
| <b>Current nutrition<sup>c</sup></b>                    |     |           |     |           |     |           |
| Neither BMI nor WHR high                                | 1.0 |           | 1.0 |           | 1.0 |           |
| One of BMI or WHR high                                  | 1.2 | (0.9-1.7) | 1.2 | (0.8-1.6) | 1.2 | (0.8-1.8) |
| Both BMI and WHR high                                   | 2.0 | (1.4-2.9) | 1.9 | (1.3-2.8) | 1.8 | (1.2-2.7) |
| <b>Non-user of biomass</b>                              | 1.0 |           | 1.0 |           |     |           |
| <b>User of biomass</b>                                  | 1.2 | (0.9-1.5) | 1.0 | (0.8-1.4) |     |           |
| <b>Long-term non-user of biomass</b>                    | 1.0 |           |     |           | 1.0 |           |
| <b>Long-term user of biomass</b>                        | 1.2 | (0.9-1.7) |     |           | 1.1 | (0.8-1.6) |

<sup>a</sup>Mutually adjusted risk estimates derived from a single regression model that included use of biomass and all of the variables that were significant ( $p < 0.1$ ) in analyses adjusted only for age

<sup>b</sup>Mutually adjusted risk estimates derived from a single regression model that included use of biomass and all of the variables that were significant ( $p < 0.1$ ) in analyses adjusted only for age, but was restricted to women who were long-term users or non-users of biomass

<sup>c</sup>Body mass index (BMI) ( $\text{kg}/\text{m}^2$ )  $\geq 25$  = high; Waist-to-hip ratio (WHR)  $\geq 0.85$  = high.

**Supplementary Table 5.** Associations of angina with risk factors.

| Risk factor                                                                                                                       | Adjusted only<br>for age<br>(n=850) |           | Fully adjusted <sup>a</sup><br>(n=850) |           | Fully adjusted and<br>limited to long-<br>term users and<br>non-users of<br>biomass <sup>b</sup><br>(n=693) |           |
|-----------------------------------------------------------------------------------------------------------------------------------|-------------------------------------|-----------|----------------------------------------|-----------|-------------------------------------------------------------------------------------------------------------|-----------|
|                                                                                                                                   | OR                                  | (95%CI)   | OR                                     | (95%CI)   | OR                                                                                                          | (95%CI)   |
| <b>Age (per 10 year increase)</b>                                                                                                 | 1.3                                 | (1.1-1.6) | 1.3                                    | (1.1-1.5) | 1.3                                                                                                         | (1.1-1.5) |
| <b>Educational status</b>                                                                                                         |                                     |           |                                        |           |                                                                                                             |           |
| Illiterate                                                                                                                        | 1.0                                 |           | -                                      |           | -                                                                                                           |           |
| Any literacy                                                                                                                      | 0.6                                 | (0.3-1.3) |                                        |           |                                                                                                             |           |
| <b>Household income/month</b>                                                                                                     |                                     |           |                                        |           |                                                                                                             |           |
| <3000-10000PKR                                                                                                                    | 1.0                                 |           | -                                      |           | -                                                                                                           |           |
| >10000PKR                                                                                                                         | 1.1                                 | (0.8-1.6) |                                        |           |                                                                                                             |           |
| <b>Household ownership</b>                                                                                                        |                                     |           |                                        |           |                                                                                                             |           |
| Rented                                                                                                                            | 1.0                                 |           | -                                      |           | -                                                                                                           |           |
| Own                                                                                                                               | 0.8                                 | (0.5-1.3) |                                        |           |                                                                                                             |           |
| <b>Construction of house</b>                                                                                                      |                                     |           |                                        |           |                                                                                                             |           |
| Katcha/semi-pucca                                                                                                                 | 1.0                                 |           | -                                      |           | -                                                                                                           |           |
| Pucca                                                                                                                             | 1.2                                 | (0.8-1.7) |                                        |           |                                                                                                             |           |
| <b>Number of household assets</b>                                                                                                 |                                     |           |                                        |           |                                                                                                             |           |
| 0-1                                                                                                                               | 1.0                                 |           | -                                      |           | -                                                                                                           |           |
| 2-3                                                                                                                               | 0.9                                 | (0.6-1.3) |                                        |           |                                                                                                             |           |
| ≥4                                                                                                                                | 1.0                                 | (0.6-1.5) |                                        |           |                                                                                                             |           |
| <b>Father's occupation in woman's<br/>childhood</b>                                                                               |                                     |           |                                        |           |                                                                                                             |           |
| Non-manual                                                                                                                        | 1.0                                 |           | -                                      |           | -                                                                                                           |           |
| Manual                                                                                                                            | 0.7                                 | (0.3-1.4) |                                        |           |                                                                                                             |           |
| <b>Birthweight</b>                                                                                                                |                                     |           |                                        |           |                                                                                                             |           |
| Lower than normal                                                                                                                 | 1.0                                 |           | -                                      |           | -                                                                                                           |           |
| Normal                                                                                                                            | 1.2                                 | (0.8-1.8) | -                                      |           | -                                                                                                           |           |
| Higher than normal                                                                                                                | 1.1                                 | (0.7-1.8) |                                        |           |                                                                                                             |           |
| <b>Ever hungry during all the time<br/>during childhood because there<br/>was not enough food</b>                                 |                                     |           |                                        |           |                                                                                                             |           |
| No                                                                                                                                | 1.0                                 |           | -                                      |           | -                                                                                                           |           |
| Yes                                                                                                                               | 0.8                                 | (0.6-1.1) |                                        |           |                                                                                                             |           |
| <b>Lost weight during childhood</b>                                                                                               |                                     |           |                                        |           |                                                                                                             |           |
| No                                                                                                                                | 1.0                                 |           | -                                      |           | -                                                                                                           |           |
| Yes                                                                                                                               | 1.0                                 | (0.8-1.4) |                                        |           |                                                                                                             |           |
| <b>Ever smoked regularly (any of<br/>cigarettes, bidi, huqqa)</b>                                                                 |                                     |           |                                        |           |                                                                                                             |           |
| Never                                                                                                                             | 1.0                                 |           | 1.0                                    |           | 1.0                                                                                                         |           |
| Ever                                                                                                                              | 2.1                                 | (1.3-3.3) | 2.0                                    | (1.2-3.2) | 2.1                                                                                                         | (1.3-3.6) |
| <b>Environmental tobacco smoke<br/>(at least one other household<br/>member smokes cigarettes, bidi<br/>or huqqa in the home)</b> |                                     |           |                                        |           |                                                                                                             |           |
| No                                                                                                                                | 1.0                                 |           | -                                      |           | -                                                                                                           |           |
| Yes                                                                                                                               | 1.2                                 | (0.9-1.6) |                                        |           |                                                                                                             |           |
| <b>Consumption of meat or eggs</b>                                                                                                |                                     |           |                                        |           |                                                                                                             |           |

|                                                         |     |           |     |           |     |           |
|---------------------------------------------------------|-----|-----------|-----|-----------|-----|-----------|
| Do not eat either meat or eggs as much as once per week | 1.0 |           | 1.0 |           | 1.0 |           |
| Eat one of meat or eggs as much as once per week        | 0.6 | (0.4-0.8) | 0.6 | (0.4-0.8) | 0.7 | (0.5-1.0) |
| Eat both meat and eggs at least once per week           | 0.4 | (0.3-0.7) | 0.5 | (0.3-0.7) | 0.5 | (0.3-0.8) |
| <b>Current nutrition<sup>c</sup></b>                    |     |           |     |           |     |           |
| Neither BMI nor WHR high                                | 1.0 |           |     |           |     |           |
| One of BMI or WHR high                                  | 0.8 | (0.5-1.1) | -   |           |     |           |
| Both BMI and WHR high                                   | 0.8 | (0.5-1.2) |     |           |     |           |
| <b>Non-user of biomass</b>                              | 1.0 |           |     |           |     |           |
| <b>User of biomass user</b>                             | 1.0 | (0.7-1.3) | 1.0 | (0.8-1.4) |     |           |
| <b>Long-term non-user of biomass</b>                    | 1.0 |           |     |           | 1.0 |           |
| <b>Long-term non-user of biomass</b>                    | 1.2 | (0.9-1.7) |     |           | 1.3 | (0.9-1.9) |

<sup>a</sup>Mutually adjusted risk estimates derived from a single regression model that included use of biomass and all of the variables that were significant ( $p < 0.1$ ) in analyses adjusted only for age

<sup>b</sup>Mutually adjusted risk estimates derived from a single regression model that included use of biomass and all of the variables that were significant ( $p < 0.1$ ) in analyses adjusted only for age, but was restricted to women who were long-term users or non-users of biomass

<sup>c</sup>Body mass index (BMI) ( $\text{kg}/\text{m}^2$ )  $\geq 25$  = high; Waist-to-hip ratio (WHR)  $\geq 0.85$  = high.

**Supplementary Table 6.** Associations of previous history of heart attack (diagnosed by a physician) with risk factors.

| Risk factor                                                                                                                       | Adjusted only<br>for age<br>(n=850) <sup>a</sup> |           | Fully adjusted <sup>b</sup><br>(n=850) |           | Fully adjusted and<br>limited to long-term<br>users and non-users of<br>biomass <sup>c</sup><br>(n=693) |           |
|-----------------------------------------------------------------------------------------------------------------------------------|--------------------------------------------------|-----------|----------------------------------------|-----------|---------------------------------------------------------------------------------------------------------|-----------|
|                                                                                                                                   | OR                                               | (95%CI)   | OR                                     | (95%CI)   | OR                                                                                                      | (95%CI)   |
| <b>Age (per 10 year increase)</b>                                                                                                 | 1.5                                              | (1.2-2.0) | 1.5                                    | (1.2-2.0) | 1.5                                                                                                     | (1.2-2.0) |
| <b>Educational status</b>                                                                                                         |                                                  |           |                                        |           |                                                                                                         |           |
| Illiterate                                                                                                                        | 1.0                                              |           | -                                      |           | -                                                                                                       |           |
| Any literacy                                                                                                                      | 1.5                                              | (0.5-4.5) |                                        |           |                                                                                                         |           |
| <b>Household income/month</b>                                                                                                     |                                                  |           |                                        |           |                                                                                                         |           |
| <3000-10000PKR                                                                                                                    | 1.0                                              |           | 1.0                                    |           | 1.0                                                                                                     |           |
| >10000PKR                                                                                                                         | 1.6                                              | (0.9-2.9) | 1.4                                    | (0.8-2.5) | 1.6                                                                                                     | (0.8-3.1) |
| <b>Household ownership</b>                                                                                                        |                                                  |           |                                        |           |                                                                                                         |           |
| Rented                                                                                                                            | 1.0                                              |           | -                                      |           | -                                                                                                       |           |
| Own                                                                                                                               | 1.2                                              | (0.4-3.4) |                                        |           |                                                                                                         |           |
| <b>Construction of house</b>                                                                                                      |                                                  |           |                                        |           |                                                                                                         |           |
| Katcha/semi-pucca                                                                                                                 |                                                  |           | -                                      |           | -                                                                                                       |           |
| Pucca                                                                                                                             | 1.3                                              | (0.7-2.3) |                                        |           |                                                                                                         |           |
| <b>Number of household assets</b>                                                                                                 |                                                  |           |                                        |           |                                                                                                         |           |
| 0-1                                                                                                                               | 1.0                                              |           | 1.0                                    |           | 1.0                                                                                                     |           |
| 2-3                                                                                                                               | 1.4                                              | (0.7-2.7) | 1.3                                    | (0.7-2.5) | 1.8                                                                                                     | (0.8-3.8) |
| ≥4                                                                                                                                | 2.1                                              | (1.0-4.3) | 1.8                                    | (0.8-3.8) | 2.1                                                                                                     | (0.9-5.1) |
| <b>Father's occupation in woman's<br/>childhood</b>                                                                               |                                                  |           |                                        |           |                                                                                                         |           |
| Non-manual                                                                                                                        | 1.0                                              |           | -                                      |           | -                                                                                                       |           |
| Manual                                                                                                                            | 1.0                                              | (0.2-4.5) |                                        |           |                                                                                                         |           |
| <b>Birthweight</b>                                                                                                                |                                                  |           |                                        |           |                                                                                                         |           |
| Lower than normal                                                                                                                 | 1.0                                              |           |                                        |           | -                                                                                                       |           |
| Normal                                                                                                                            | 1.0                                              | (0.5-1.9) | -                                      |           |                                                                                                         |           |
| Higher than normal                                                                                                                | 0.7                                              | (0.3-1.7) |                                        |           |                                                                                                         |           |
| <b>Ever hungry during all the time<br/>during childhood because there<br/>was not enough food</b>                                 |                                                  |           |                                        |           |                                                                                                         |           |
| No                                                                                                                                | 1.0                                              |           | -                                      |           | -                                                                                                       |           |
| Yes                                                                                                                               | 1.0                                              | (0.6-1.7) |                                        |           |                                                                                                         |           |
| <b>Lost weight during childhood</b>                                                                                               |                                                  |           |                                        |           |                                                                                                         |           |
| No                                                                                                                                | 1.0                                              |           | -                                      |           | -                                                                                                       |           |
| Yes                                                                                                                               | 1.1                                              | (0.6-1.9) |                                        |           |                                                                                                         |           |
| <b>Ever smoked regularly (any of<br/>cigarettes, bidi, huqqa)</b>                                                                 |                                                  |           |                                        |           |                                                                                                         |           |
| Never                                                                                                                             | 1.0                                              |           | -                                      |           | -                                                                                                       |           |
| Ever                                                                                                                              | 0.9                                              | (0.4-2.1) |                                        |           |                                                                                                         |           |
| <b>Environmental tobacco smoke (at<br/>least one other household member<br/>smokes cigarettes, bidi or huqqa in<br/>the home)</b> |                                                  |           |                                        |           |                                                                                                         |           |
| No                                                                                                                                | 1.0                                              |           | -                                      |           | -                                                                                                       |           |
| Yes                                                                                                                               | 0.9                                              | (0.5-1.6) |                                        |           |                                                                                                         |           |
| <b>Consumption of meat or eggs</b>                                                                                                |                                                  |           |                                        |           |                                                                                                         |           |

|                                                         |     |           |     |           |               |
|---------------------------------------------------------|-----|-----------|-----|-----------|---------------|
| Do not eat either meat or eggs as much as once per week | 1.0 |           | -   |           |               |
| Eat one of meat or eggs as much as once per week        | 1.2 | (0.6-2.3) |     |           |               |
| Eat both meat and eggs at least once per week           | 1.8 | (0.9-3.5) |     |           |               |
| <b>Current nutrition<sup>d</sup></b>                    |     |           |     |           |               |
| Neither BMI nor WHR high                                | 1.0 |           | 1.0 | 1.0       |               |
| One of BMI or WHR high                                  | 1.3 | (0.6-2.5) | 1.2 | (0.6-2.5) | 1.6 (0.7-3.4) |
| Both BMI and WHR high                                   | 2.0 | (1.0-4.0) | 1.9 | (0.9-3.7) | 1.7 (0.8-3.6) |
| <b>Non-user of biomass</b>                              | 1.0 |           | 1.0 | -         |               |
| <b>Use of biomass</b>                                   | 1.4 | (0.8-2.4) | 1.2 | (0.7-2.2) |               |
| <b>Long-term non-user of biomass</b>                    | 1.0 |           |     | 1.0       |               |
| <b>Long-term user of biomass</b>                        | 1.5 | (0.8-2.7) |     | 1.3       | (0.7-2.4)     |

<sup>a</sup>Mutually adjusted risk estimates derived from a single regression model that included use of biomass and all of the variables that were significant ( $p < 0.1$ ) in analyses adjusted only for age

<sup>b</sup>Mutually adjusted risk estimates derived from a single regression model that included use of biomass and all of the variables that were significant ( $p < 0.1$ ) in analyses adjusted only for age, but was restricted to women who were long-term users or non-users of biomass

<sup>c</sup>Body mass index (BMI) ( $\text{kg}/\text{m}^2$ )  $\geq 25$  = high; Waist-to-hip ratio (WHR)  $\geq 0.85$  = high.

**Supplementary Table 7.** Associations of definite or probable CHD on ECG with risk factors.

| Risk factor                                                                                                           | Adjusted only for age<br>(n=841) |           | Fully adjusted <sup>a</sup><br>(n=841) |           | Fully adjusted and limited to long-term users and non-users of biomass <sup>b</sup><br>(n=686) |           |
|-----------------------------------------------------------------------------------------------------------------------|----------------------------------|-----------|----------------------------------------|-----------|------------------------------------------------------------------------------------------------|-----------|
|                                                                                                                       | OR                               | (95%CI)   | OR                                     | (95%CI)   | OR                                                                                             | (95%CI)   |
| <b>Age (per 10 year increase)</b>                                                                                     | 1.1                              | (0.9-1.3) | 1.1                                    | (0.9-1.3) | 1.0                                                                                            | (0.8-1.3) |
| <b>Educational status</b>                                                                                             |                                  |           |                                        |           |                                                                                                |           |
| Illiterate                                                                                                            | 1.0                              |           | -                                      |           | -                                                                                              |           |
| Any literacy                                                                                                          | 0.8                              | (0.4-1.7) |                                        |           |                                                                                                |           |
| <b>Household income/month</b>                                                                                         |                                  |           |                                        |           |                                                                                                |           |
| <3000-10000PKR                                                                                                        | 1.0                              |           | 1.0                                    |           | 1.0                                                                                            |           |
| >10000PKR                                                                                                             | 1.6                              | (1.1-2.3) | 1.6                                    | (1.1-2.4) | 1.3                                                                                            | (0.8-2.0) |
| <b>Household ownership</b>                                                                                            |                                  |           |                                        |           |                                                                                                |           |
| Rented                                                                                                                | 1.0                              |           | -                                      |           | -                                                                                              |           |
| Own                                                                                                                   | 1.4                              | (0.7-2.9) |                                        |           |                                                                                                |           |
| <b>Construction of house</b>                                                                                          |                                  |           |                                        |           |                                                                                                |           |
| Katcha/semi-pucca                                                                                                     | 1.0                              |           | -                                      |           | -                                                                                              |           |
| Pucca                                                                                                                 | 1.0                              | (0.7-1.5) |                                        |           |                                                                                                |           |
| <b>Number of household assets</b>                                                                                     |                                  |           |                                        |           |                                                                                                |           |
| 0-1                                                                                                                   | 1.0                              |           | -                                      |           | -                                                                                              |           |
| 2-3                                                                                                                   | 1.0                              | (0.7-1.5) |                                        |           |                                                                                                |           |
| ≥4                                                                                                                    | 1.3                              | (0.8-2.1) |                                        |           |                                                                                                |           |
| <b>Father's occupation in woman's childhood</b>                                                                       |                                  |           |                                        |           |                                                                                                |           |
| Non-manual                                                                                                            | 1.0                              |           | -                                      |           | -                                                                                              |           |
| Manual                                                                                                                | 1.0                              | (0.4-2.3) |                                        |           |                                                                                                |           |
| <b>Birthweight</b>                                                                                                    |                                  |           |                                        |           |                                                                                                |           |
| Lower than normal                                                                                                     | 1.0                              |           | -                                      |           | -                                                                                              |           |
| Normal                                                                                                                | 1.1                              | (0.7-1.7) | -                                      |           | -                                                                                              |           |
| Higher than normal                                                                                                    | 1.1                              | (0.7-1.9) |                                        |           |                                                                                                |           |
| <b>Ever hungry during all the time during childhood because there was not enough food</b>                             |                                  |           |                                        |           |                                                                                                |           |
| No                                                                                                                    | 1.0                              |           | -                                      |           | -                                                                                              |           |
| Yes                                                                                                                   | 1.1                              | (0.8-1.6) |                                        |           |                                                                                                |           |
| <b>Lost weight during childhood</b>                                                                                   |                                  |           |                                        |           |                                                                                                |           |
| No                                                                                                                    | 1.0                              |           | -                                      |           | -                                                                                              |           |
| Yes                                                                                                                   | 0.8                              | (0.6-1.2) |                                        |           |                                                                                                |           |
| <b>Ever smoked regularly (any of cigarettes, bidi, huqqa)</b>                                                         |                                  |           |                                        |           |                                                                                                |           |
| Never                                                                                                                 | 1.0                              |           | -                                      |           | -                                                                                              |           |
| Ever                                                                                                                  | 1.0                              | (0.6-1.8) |                                        |           |                                                                                                |           |
| <b>Environmental tobacco smoke (at least one other household member smokes cigarettes, bidi or huqqa in the home)</b> |                                  |           |                                        |           |                                                                                                |           |
| No                                                                                                                    | 1.0                              |           | -                                      |           | -                                                                                              |           |
| Yes                                                                                                                   | 0.9                              | (0.6-1.3) | -                                      |           | -                                                                                              |           |
| <b>Consumption of meat or eggs</b>                                                                                    |                                  |           |                                        |           |                                                                                                |           |



|                                                         |     |           |  |
|---------------------------------------------------------|-----|-----------|--|
| Do not eat either meat or eggs as much as once per week | 1.0 |           |  |
| Eat one of meat or eggs as much as once per week        | 0.9 | (0.6-1.4) |  |
| Eat both meat and eggs at least once per week           | 1.2 | (0.7-1.8) |  |

---

**Current nutrition<sup>c</sup>**

|                          |     |           |   |
|--------------------------|-----|-----------|---|
| Neither BMI nor WHR high | 1.0 |           |   |
| One of BMI or WHR high   | 0.8 | (0.5-1.2) | - |
| Both BMI and WHR high    | 1.1 | (0.7-1.6) |   |

---

**Non-user of biomass user** 1.0 1.0

**User of biomass** 0.8 (0.6-1.2) 0.8 (0.6-1.2)

---

**Longterm non-user of biomass** 1.0 1.0

**Longterm user of biomass** 0.9 (0.6-1.3) 0.9 (0.6-1.3)

---

<sup>a</sup>ECGs were missing for 9 women or not codable due to poor quality.

<sup>b</sup>Mutually adjusted risk estimates derived from a single regression model that included use of biomass and all of the variables that were significant ( $p < 0.1$ ) in analyses adjusted only for age

<sup>c</sup>Mutually adjusted risk estimates derived from a single regression model that included use of biomass and all of the variables that were significant ( $p < 0.1$ ) in analyses adjusted only for age, but was restricted to women who were long-term users or non-users of biomass

<sup>d</sup>Body mass index (BMI) ( $\text{kg}/\text{m}^2$ )  $\geq 25$  = high; Waist-to-hip ratio (WHR)  $\geq 0.85$  = high.

STROBE 2007 (v4) Statement—Checklist of items that should be included in reports of cross-sectional studies

| Section/Topic             | Item # | Recommendation                                                                                                                                                                       | Reported on page # |
|---------------------------|--------|--------------------------------------------------------------------------------------------------------------------------------------------------------------------------------------|--------------------|
| Title and abstract        | 1      | (a) Indicate the study’s design with a commonly used term in the title or the abstract                                                                                               | 1                  |
|                           |        | (b) Provide in the abstract an informative and balanced summary of what was done and what was found                                                                                  | 1-2                |
| <b>Introduction</b>       |        |                                                                                                                                                                                      |                    |
| Background/rationale      | 2      | Explain the scientific background and rationale for the investigation being reported                                                                                                 | 3                  |
| Objectives                | 3      | State specific objectives, including any prespecified hypotheses                                                                                                                     | 3                  |
| <b>Methods</b>            |        |                                                                                                                                                                                      |                    |
| Study design              | 4      | Present key elements of study design early in the paper                                                                                                                              | 3                  |
| Setting                   | 5      | Describe the setting, locations, and relevant dates, including periods of recruitment, exposure, follow-up, and data collection                                                      | 3                  |
| Participants              | 6      | (a) Give the eligibility criteria, and the sources and methods of selection of participants                                                                                          | 3                  |
| Variables                 | 7      | Clearly define all outcomes, exposures, predictors, potential confounders, and effect modifiers. Give diagnostic criteria, if applicable                                             | 3-5                |
| Data sources/ measurement | 8*     | For each variable of interest, give sources of data and details of methods of assessment (measurement). Describe comparability of assessment methods if there is more than one group | 3-5                |
| Bias                      | 9      | Describe any efforts to address potential sources of bias                                                                                                                            | 3-5                |
| Study size                | 10     | Explain how the study size was arrived at                                                                                                                                            | 5                  |
| Quantitative variables    | 11     | Explain how quantitative variables were handled in the analyses. If applicable, describe which groupings were chosen and why                                                         | 5                  |
| Statistical methods       | 12     | (a) Describe all statistical methods, including those used to control for confounding                                                                                                | 5                  |
|                           |        | (b) Describe any methods used to examine subgroups and interactions                                                                                                                  | 5                  |
|                           |        | (c) Explain how missing data were addressed                                                                                                                                          | In relevant tables |
|                           |        | (d) If applicable, describe analytical methods taking account of sampling strategy                                                                                                   | N/A                |
|                           |        | (e) Describe any sensitivity analyses                                                                                                                                                | N/A                |
| <b>Results</b>            |        |                                                                                                                                                                                      |                    |

|                          |     |                                                                                                                                                                                                              |                          |
|--------------------------|-----|--------------------------------------------------------------------------------------------------------------------------------------------------------------------------------------------------------------|--------------------------|
| Participants             | 13* | (a) Report numbers of individuals at each stage of study—eg numbers potentially eligible, examined for eligibility, confirmed eligible, included in the study, completing follow-up, and analysed            | 6                        |
|                          |     | (b) Give reasons for non-participation at each stage                                                                                                                                                         | 6                        |
|                          |     | (c) Consider use of a flow diagram                                                                                                                                                                           | Not needed               |
| Descriptive data         | 14* | (a) Give characteristics of study participants (eg demographic, clinical, social) and information on exposures and potential confounders                                                                     | 6 and Tables 1-3         |
|                          |     | (b) Indicate number of participants with missing data for each variable of interest                                                                                                                          | Tables 1-3               |
| Outcome data             | 15* | Report numbers of outcome events or summary measures                                                                                                                                                         | 6                        |
| Main results             | 16  | (a) Give unadjusted estimates and, if applicable, confounder-adjusted estimates and their precision (eg, 95% confidence interval). Make clear which confounders were adjusted for and why they were included | Supplementary Tables 4-7 |
|                          |     | (b) Report category boundaries when continuous variables were categorized                                                                                                                                    | Tables                   |
|                          |     | (c) If relevant, consider translating estimates of relative risk into absolute risk for a meaningful time period                                                                                             | N/A                      |
| Other analyses           | 17  | Report other analyses done—eg analyses of subgroups and interactions, and sensitivity analyses                                                                                                               | N/A                      |
| <b>Discussion</b>        |     |                                                                                                                                                                                                              |                          |
| Key results              | 18  | Summarise key results with reference to study objectives                                                                                                                                                     | 8                        |
| Limitations              | 19  | Discuss limitations of the study, taking into account sources of potential bias or imprecision. Discuss both direction and magnitude of any potential bias                                                   | 8-9                      |
| Interpretation           | 20  | Give a cautious overall interpretation of results considering objectives, limitations, multiplicity of analyses, results from similar studies, and other relevant evidence                                   | 10                       |
| Generalisability         | 21  | Discuss the generalisability (external validity) of the study results                                                                                                                                        | 8                        |
| <b>Other information</b> |     |                                                                                                                                                                                                              |                          |
| Funding                  | 22  | Give the source of funding and the role of the funders for the present study and, if applicable, for the original study on which the present article is based                                                | 2                        |

\*Give information separately for cases and controls in case-control studies and, if applicable, for exposed and unexposed groups in cohort and cross-sectional studies.

**Note:** An Explanation and Elaboration article discusses each checklist item and gives methodological background and published examples of transparent reporting. The STROBE checklist is best used in conjunction with this article (freely available on the Web sites of PLoS Medicine at <http://www.plosmedicine.org/>, Annals of Internal Medicine at <http://www.annals.org/>, and Epidemiology at <http://www.epidem.com/>). Information on the STROBE Initiative is available at [www.strobe-statement.org](http://www.strobe-statement.org).

# BMJ Open

## Coronary Heart Disease, Hypertension and Use of Biomass Fuel among Women: Comparative Cross-sectional Study.

|                                 |                                                                                                                                                                                                                                                                                  |
|---------------------------------|----------------------------------------------------------------------------------------------------------------------------------------------------------------------------------------------------------------------------------------------------------------------------------|
| Journal:                        | <i>BMJ Open</i>                                                                                                                                                                                                                                                                  |
| Manuscript ID                   | bmjopen-2019-030881.R3                                                                                                                                                                                                                                                           |
| Article Type:                   | Research                                                                                                                                                                                                                                                                         |
| Date Submitted by the Author:   | 06-Jul-2019                                                                                                                                                                                                                                                                      |
| Complete List of Authors:       | Fatmi, Zafar; Aga Khan University, Department of Community Health Sciences<br>Ntani, G; University of Southampton and Southampton University Hospitals NHS Trust, MRC Lifecourse Epidemiology Unit<br>Coggon, David; University of Southampton, MRC Lifecourse Epidemiology Unit |
| <b>Primary Subject Heading</b>: | Global health                                                                                                                                                                                                                                                                    |
| Secondary Subject Heading:      | Epidemiology, Occupational and environmental medicine, Public health                                                                                                                                                                                                             |
| Keywords:                       | Coronary heart disease < CARDIOLOGY, biomass fuel, Hypertension < CARDIOLOGY, women, EPIDEMIOLOGY, Public health < INFECTIOUS DISEASES                                                                                                                                           |
|                                 |                                                                                                                                                                                                                                                                                  |

SCHOLARONE™  
Manuscripts

# Coronary Heart Disease, Hypertension and Use of Biomass Fuel among Women: Comparative Cross-sectional Study.

Zafar Fatmi,<sup>1,2</sup> Georgia Ntani,<sup>2</sup> David Coggon<sup>2</sup>

<sup>1</sup>Department of Community Health Sciences, Aga Khan University, PO Box 3500, Karachi 74800, Pakistan.

<sup>2</sup>MRC Lifecourse Epidemiology Unit, University of Southampton, Southampton, UK.

\*Correspondence should be addressed to Zafar Fatmi; [zafar.fatmi@aku.edu](mailto:zafar.fatmi@aku.edu) ;

## Abstract

**Objectives:** To explore the associations of hypertension and coronary heart disease (CHD) with use of biomass fuel for cooking.

**Design:** Comparative cross-sectional study.

**Setting:** Rural villages in Sindh, Pakistan.

**Participants:** Women aged  $\geq 40$  years who had used biomass fuel for cooking for at least the past year (n = 436), and a comparison group (n=414) who had cooked only with non-biomass fuel during the past year were recruited through door-to-door visits. None of those who were invited to take part declined.

**Primary and secondary outcome measures:** Hypertension was determined from blood pressure measurements and use of medication. CHD was assessed by three measures: history of angina (Rose angina questionnaire), previous history of 'heart attack', and definite or probable changes of CHD on electrocardiogram (ECG). Potentially confounding risk factors were ascertained by questionnaire and anthropometry. Associations of hypertension and CHD with use of biomass and other risk factors were assessed by logistic regression, and summarised by odds ratios (ORs) with 95% confidence intervals (CIs).

**Results:** After adjustment for potential confounders, there was no association of hypertension (OR: 1.0, 95% CI 0.8 – 1.4) angina (OR: 1.0, 95% CI 0.8-1.4), heart attack (OR: 1.2, 95% 0.7 – 2.2) or ECG changes of CHD (OR: 0.8, 95% CI 0.6 – 1.2) with current use of biomass for cooking. Nor were any associations apparent when analyses were restricted to long-term ( $\geq 10$  years) users and non-users of biomass fuel.

**Conclusions:** A linked air monitoring study indicated substantially higher airborne concentrations of fine particulate matter in kitchens where biomass was used for cooking. It is possible that associations with CHD and hypertension were missed because most of the comparison group had used biomass for cooking at some time in the past, and risk remains elevated for many years after last exposure.

## Strengths and limitations of this study:

- The study was well-powered with a high response rate (93%) from those invited to take part, and large contrasts between comparison groups in recent exposure to indoor air pollution.

- Comparisons were based on recent cooking practices, but some exposures may have changed since the onset of CHD.
- Many women who did not currently use biomass for cooking, had done so in the past, and this may have obscured associations with health outcomes if effects of exposure persist long-term.
- Errors may have occurred in the assessment of outcome measures, biasing risk estimates towards the null.
- Recall of some potentially confounding factors may have been inaccurate, leading to uncontrolled residual confounding.

#### **Funding Statement**

This research was supported by a fellowship from the Colt Foundation for the conduct of a PhD by Professor Zafar Fatmi. Professor David Coggon and Dr Georgia Ntani were supported by funding from the UK Medical Research Council (MRC\_MC\_UU\_12011/5).

#### **Conflicts of Interest**

The authors declare that there is no conflict of interest regarding the publication of this paper.

#### **Authors' contributions**

ZF led the design and conduct of the study, carried out the initial statistical analyses, and wrote the first draft of the manuscript.

GN oversaw and guided the statistical analysis.

DC supervised the project and amended the first draft of the manuscript.

All authors approved the final version of the manuscript.

## Introduction

Some three billion people across the globe use biomass fuel (such as wood, crop wastes, animal-dung, and charcoal/coal) for cooking and heating [1]. Burning of biomass fuels in inefficient stoves or open fires causes household air pollution (HAP) and leads to an estimated 3.8 million deaths per year globally [2]. It primarily affects women and young children in low- and middle-income countries (LMICs). Such women often work for 4-5 hours per day in the kitchen, and with their young children may spend 90% of their time at home [2,3]. About 77% of households in Africa and 60% in Southeast Asia use biomass fuel [1].

The HAP from burning biomass consists of hundreds of health-damaging pollutants, but finer particles ( $<2.5\mu\text{m}$  –  $\text{PM}_{2.5}$ ) and carbon monoxide (CO) are the major emissions, and have been studied most extensively.  $\text{PM}_{2.5}$  causes inflammation of the lungs and airways, and impairs immune responses [4]. Concentrations of  $\text{PM}_{2.5}$  in kitchens and living rooms can be 100 times higher than the acceptable standard for ambient (outdoor) air [5]. HAP predisposes to upper and lower respiratory tract infections among children [6-8], and also causes chronic obstructive pulmonary disease [9-10] and lung cancer in adults [11-13]. It has been linked with early foetal loss, preterm delivery and low birth weight babies [14,15], and evidence is accumulating that it may also affect the physical and cognitive development of young children [16].

In addition, several studies have suggested a hazard of coronary heart disease (CHD) from HAP exposure, but evidence for this is limited and inconclusive [17, 18]. Several adverse cardiovascular outcomes have been studied, including acute coronary syndrome (myocardial infarction /unstable angina), coronary heart disease, and high blood pressure. Two small scale case-control studies found significantly high risk of acute coronary syndrome with use of solid fuel [19,20]. In addition, a cohort study found an association between myocardial infarction and domestic use of coal among women in China [21]. Lee and colleagues [22], in a large cross-sectional survey of adults in China found a positive association with CHD. On the other hand, two large cohort studies, one in Iran [23] and other in Bangladesh [24], found no association with CHD, although it is unclear how potential confounders were taken into account in those investigations. Most studies have found significant positive associations between use of solid fuel and higher blood pressure [25-28] or prevalence of hypertension [22, 29-31], but in others, no association was apparent [25,32-33].

In Pakistan, where biomass fuel is used for cooking and heating by 52% of households overall, and 75% in rural areas, an exploratory case-control study found an elevated risk of acute coronary syndrome among women using solid fuel [20].

We, therefore, carried out a cross-sectional survey to explore the association between CHD and cooking with biomass in a sample of women drawn from the general population in rural areas of Pakistan. The objective of the study was to compare the prevalence of hypertension, angina, previous history of heart attack, and electrocardiographic (ECG) changes indicative of CHD in women  $\geq 40$  years of age who used biomass fuel for cooking with that in women of similar age who cooked using other types of fuel.

## Materials and Methods

### *Study Setting*

The survey was conducted during 2015 in villages surrounding the main urban area of Nawabshah district (recently renamed as Shaheed Benazirabad) in the province of Sindh, Pakistan. These were selected to give a mix in the fuels used for cooking within the study sample. Some of the villages had been supplied with natural gas for at least 10 years, whereas in others biomass fuel (wood and/or cow dung) was still being used.



### *Recruitment of households and subjects*

Within each village, trained field workers made door-to-door visits, and asked the heads of households whether their families would be willing to assist with the study, and if so, what type of fuel was used for cooking, and whether food preparation was regularly undertaken by a woman  $\geq 40$  years of age. In this way, the study team identified quotas of the required numbers of households in each of the two categories of fuel use (biomass and other). The heads of these households were then asked to complete a consent form, and to identify and introduce the woman of the household aged  $\geq 40$  years who had carried out the most cooking in the house over the past 10 years. The study was explained to her, and she was invited to participate and to give signed consent.

### *Inclusion criteria*

Women aged 40 years or older were eligible for inclusion if they gave informed consent, and had been cooking in the household for at least the past year, using only one of biomass fuel or non-biomass fuel.

### *Questionnaire, examination and measurements*

A standardized questionnaire was used to collect information at interview about: demographic and socio-economic characteristics, birth weight, smoking history, whether another member of the household was a regular smoker, relevant aspects of diet, physical activity, lifetime history of cooking using different types of fuel, any previous diagnosis of a 'heart attack' by a doctor, symptoms of angina (through the Rose angina questionnaire [34]), and any current use of medication for hypertension. In addition, measurements were made of height, weight, waist circumference, hip circumference and blood pressure.

Socioeconomic status was characterized by the literacy of the participant (no vs. any literacy), the type of employment of her father during her childhood (manual or non-manual), the ownership and construction of her house ('pucca' i.e. made of concrete walls and roof or 'katcha/semi-pucca' i.e. made fully or partially of thatched walls and roof), the income level of the household, and the number of household assets owned from a list of seven. Birth weight was determined from participants' recall as being 'higher than normal vs. normal vs. lower than normal'.

The questions on smoking covered use of cigarettes or *bidi* (locally made cigarettes without filters) or a hookah (pipe) regularly (at least once a week for a month or longer). The number of other people in the household who smoked provided a measure of domestic exposure to environmental tobacco smoke (ETS), which was classified according to whether at least one other household member smoked cigarettes or *bidi* or a hookah in the home.

Dietary questions covered the use of oil or ghee for cooking and eating, and weekly consumption of meat and eggs. The former was categorized to three levels: only or mostly use oil; mixed use of oil and ghee; only or mostly use ghee. Frequencies of consuming meat and eggs were each categorized to two levels: at least once per week vs. less than once per week.

Level of physical activity was assessed through questions on the frequency per week of shopping, fetching water, washing clothes, collecting wood for cooking, agricultural work on a farm and any other regular heavy physical work. Each of these activities was categorized to two levels: zero days per week or at least once per week. A composite physical activity score was then derived as the number of activities carried out at least once per week, with values ranging from 0 to 6.

Height, weight, and waist and hip circumference were measured using a stadiometer, digital weighing scale and measuring tape, following standardized methods. Body mass index (BMI) (weight in kilograms per squared height in meters) and waist-to-hip ratio (WHR) were then calculated from the

1  
2  
3 measurements. BMIs  $\geq 25\text{kg/m}^2$  were considered abnormally high (overweight or obese), as were  
4 WHRs of  $\geq 0.85$ .  
5

6 *Categories of exposure to biomass:*  
7

8 Use of biomass was classed to two main categories; biomass users who currently used firewood  
9 and/or cow dung for cooking; and non-users of biomass who did not (other sorts of biomass were not  
10 used for cooking in the community studied).  
11

12  
13 In addition, two subsets of these main categories were distinguished: long-term biomass users who  
14 currently used firewood and/or cow dung for cooking and had done so for at least the past 10 years;  
15 and long-term non-users of biomass who currently did not use either firewood or cow dung for  
16 cooking and had not done so for at least the past 10 years.  
17

18 *Outcome measures:*  
19

20 Four outcome measures were specified.  
21

22  
23 Hypertension: Three measurements of blood pressure were made at five-minute intervals, using an  
24 Omron upper arm blood pressure monitor, and mean values for systolic and diastolic blood pressure  
25 were derived. Women were deemed to have hypertension if they met at least one of the three criteria:  
26 mean systolic blood pressure  $\geq 140$  mm Hg; mean diastolic blood pressure  $\geq 90$  mm Hg; regular use of  
27 medication for blood pressure.  
28

29  
30 Angina: Experience of angina was assessed through the Rose angina questionnaire [34], which  
31 comprises seven questions relating to chest pain, its anatomical distribution, precipitating and  
32 relieving factors, and duration. A diagnosis of angina required report of pain, pressure or discomfort  
33 in the chest centrally, or in both the left anterior chest and left arm, that occurred when walking uphill  
34 or hurrying, that caused the participant to stop or slow down when it occurred while walking, and that  
35 was then relieved within 10 minutes by standing still.  
36

37 Heart attack: Previous diagnosis of 'heart attack' by a doctor was ascertained through a single  
38 question: 'In the past, have you ever been told by a health care provider that you had a 'heart attack'?'  
39

40  
41 Definite or probable CHD on ECG: A 12-lead ECG was recorded according to a standard protocol,  
42 and coded for the presence of definite or probable CHD, using the Minnesota Code Manual of  
43 Electrocardiographic Findings, second edition [35]. This corresponded to the presence of any of  
44 codes 1-1 to 1-3, 3-1, 4-1 to 4-4, 5-1 to 5-3, 7-1-1 and 9-2. In order to check the repeatability of the  
45 coding, two of us (ZF and DC) coded all of the ECGs independently. We used the same scanned ECG  
46 traces, without information about the type of cooking fuel used by the participant. Levels of  
47 agreement between the observers were assessed, using kappa statistics. Where differences occurred in  
48 the classification of an ECG trace, they were then resolved by discussion between the two observers.  
49

50 *Statistical analysis*  
51

52 Data were double-entered in Epidata 3.1 software [36] for validation. All discrepancies were  
53 corrected by reference to the original questionnaire or record sheet. Statistical analysis was carried out  
54 with Stata version 12.0 [37].  
55

56 As a first step, several variables were reclassified or combined, based on their distribution in the full  
57 study sample, and without knowledge of participants' use of biomass fuel. Thus, a combined index  
58 was derived for frequency of consuming meat and eggs with three levels: neither meat nor eggs as  
59 much as once per week; one of meat or eggs at least once per week; both meat and eggs at least once  
60

per week. Scores for physical activity were categorized into three levels: low (0-1 activities); medium (2-3); high (4 or more). Similarly, BMI and WHR were combined as a single variable with three categories: neither BMI nor WHR high; one of BMI or WHR high; both BMI and WHR high.

Descriptive statistics were produced for women in each of the four categories of exposure to biomass, summarizing their demographic and socioeconomic characteristics, current and past cooking arrangements, types and durations of fuel use, hours of cooking per day, types of stove and kitchen, and exposures to potentially confounding risk factors. The prevalence of the main outcomes was determined for the study sample overall, and the relationship of ECG changes to angina and history of heart attack was explored.

Logistic regression analysis was then used to assess the association of each of the four outcome variables with use of biomass fuel for cooking and other possible risk factors. First, associations with each potential risk factor were determined after adjustment for age. The main exposure of interest (user or non-user of biomass) was then carried forward into a mutually adjusted model along with all other risk factors which showed associations ( $p \leq 0.1$ ) when examined individually. In addition, a second mutually adjusted model was fitted that compared long-term use and non-use of biomass for cooking.

#### *Sample size*

The size of the study sample was determined by a power calculation which assumed an outcome prevalence of at least 6% for definite CHD among non-users of biomass fuel, based on a previous study in Pakistan [38] (the prevalence of other outcomes was expected to be higher). This indicated that we would require at least 876 women (438 users and 438 non-users of biomass) for 80% power to detect an odds ratio of 2.0 for the use of biomass fuel with a 5% level of statistical significance.

#### *Patient and public involvement*

There was no involvement of patients or the public in development of this study.

#### *Ethical approval*

The study was approved by Ethics Review Committee of Aga Khan University, Karachi, Pakistan.

## **Results**

A total of 24 villages were visited in order to recruit the number of households required for the survey. In 14 villages all households used biomass for cooking, while in three all used natural gas, and in the other seven, both types of fuel were used. The number of participating households per village ranged from as few as three to as many as 210. Interviews were completed with women from a total of 1073 households, 536 of which currently used biomass fuel, and 537 natural gas (including LPG). No-one declined to participate in the study, but 77 women could not be interviewed because they were not at home at the time when the survey team visited (mostly because they were engaged in agricultural work).

Among the 1073 women who completed interviews, 44 indicated that they were in fact aged less than 40 years of age, and were therefore excluded from the analysis. An additional 151 women had not made meals regularly (at least one meal per day on most days of the week) during the past year, and were also excluded. We further excluded 28 women who did not currently use firewood or cow dung for cooking, but whose time since last use of biomass was  $< 2$  years (this was done to ensure distinct exposure categories). Thus, further analysis was based on 850 women: 436 users and 414 non-users of biomass. Among them, 430 were long-term users of biomass, and 263 were long-term non-users.

1  
2  
3 Table 1 summarizes the demographic and socioeconomic characteristics of the participants in the  
4 study sample overall, and according to categories of exposure to biomass fuel. In comparison with  
5 users of biomass, non-users were marginally younger (63% versus 60% <50 years), and somewhat  
6 more advantaged socioeconomically.  
7

8 Table 2 describes the current and past cooking arrangements of participants, including type and  
9 duration of fuel use, intensity of cooking, and type of stove and kitchen. Even among the long-term  
10 non-users of biomass, 88% had cooked with biomass fuels at some time in their life. Among the  
11 biomass users, the large majority had used wood (93%) and cow dung (88%) for longer than 20 years.  
12 Few participants (3.7% of biomass users and 6.3% of non-users) had ever used kerosene as a cooking  
13 fuel. Most participants (approximately 60%) currently cooked for 2-3 hours per day, the average  
14 duration of cooking per day being similar in users and non-users of biomass. Where biomass was used  
15 for cooking, it was also more likely to be used to heat the home.  
16  
17

18 Table 3 shows the distribution of potentially confounding risk factors for CHD in the four categories  
19 of exposure to biomass. In comparison with non-users of biomass users, slightly higher proportions of  
20 women using biomass reported having been born with 'lower than normal' birth weight, having lost  
21 weight at some time during childhood, ever having smoked, and being exposed to environmental  
22 tobacco smoke in the home.  
23

#### 24 *Prevalence of outcome measures*

25 Supplementary Table 1 shows the prevalence of the main outcome measures that were investigated. In  
26 total, 297 women (35%) were classed as having hypertension, two thirds of whom were taking regular  
27 medication for blood pressure. About 27% had symptoms indicative of angina based on Rose's  
28 questionnaire. Fifty-four (6.4%) reported a previous history of 'heart attack', and 19% of women had  
29 findings of 'definite or probable CHD on ECG'.  
30  
31

#### 32 *Validity of ECG classification and interrelationships of outcome measures:*

33 Supplementary Table 2 compares the classification of ECGs by the two observers. Satisfactory ECG  
34 traces were obtained for 841 (98.9%) of the participants, but four were missing from the file used to  
35 assess inter-observer agreement, and were later assessed jointly by the two observers. The overall  
36 agreement between the two observers was 85.2% (kappa = 0.57). Most disagreements were related to  
37 cases in which the exceedance of a threshold in, for example, ST elevation, ST depression or the  
38 width (duration) of a Q wave was borderline. In some cases, it was questionable whether there was a  
39 small R wave or a QS pattern. Also, there was some disagreement about whether T waves were  
40 negative or flat. Following discussion between the two observers, all of the discrepancies were  
41 reconciled, and it was finally agreed that 181 women (21.5%) showed changes indicative of 'definite  
42 or probable CHD'. However, in 22 of these cases, it appeared that the abnormality had occurred only  
43 because the ECG leads had been placed incorrectly, and those traces were reclassified as normal.  
44 Thus in further analyses, 159 (19%) of women were considered to have definite or probable CHD on  
45 ECG.  
46  
47

48 Supplementary Table 3 shows the prevalence of definite or probable CHD on ECG according to  
49 symptoms of angina and history of heart attack. It was somewhat more frequent in participants who  
50 reported an earlier heart attack (26%) than in those who did not and had no symptoms of angina  
51 (18%). However, there was no association with angina in the absence of heart attack.  
52

#### 53 *Association of outcome measures with use of biomass and other risk factors*

54 Associations of hypertension and the three CHD outcomes (angina, heart attack and definite or  
55 probable CHD on ECG) with potential risk factors are presented in Supplementary Tables 4 to 7, from  
56 which the risk estimates for use of biomass fuel for cooking are summarized in Table 4. The first  
57 column of each table gives odds ratios adjusted only for age, while the second column presents  
58 mutually adjusted risk estimates from a single model that included use of biomass and all of the risk  
59 factors that showed associations ( $p \leq 0.1$ ) in the analyses adjusted only for age. The last column shows  
60

findings from a similar analysis but restricted to women who were long-term users or non-users of biomass.

In analyses that adjusted only for age, hypertension was associated ( $p \leq 0.1$ ) with older age, a higher number of household assets, higher frequency of consuming meat and eggs, and having a high BMI or WHR (Supplementary Table 4). When these variables were carried forward to the mutually adjusted analysis, the association with consumption of meat and eggs was diminished, but the others remained. Thus, the risk of hypertension increased 40% with every 10-year increase in age, was 2.3 times higher in women with  $\geq 4$  household assets than in those with 0 or 1, and was increased 1.9-fold in women who had both high BMI and high WHR as compared with those in whom neither BMI nor WHR were elevated. However, hypertension was not associated with use of biomass (OR 1.0 in the fully adjusted model). When analysis was restricted to long-term users and non-users of biomass, results were similar, with an OR of 1.1 for long-term use of biomass.

In analyses that adjusted only for age, the odds of angina increased with age and regular smoking, and were significantly lower with more frequent consumption of meat and eggs (Supplementary Table 5). Moreover, this pattern was maintained when risk estimates were mutually adjusted. Thus, the odds of angina increased by 30% per 10-year increase in age, and with ever having smoked regularly (OR 2.0, 95%CI 1.2-3.2), and were significantly lower in women who ate both meat and eggs at least once per week (OR 0.5, 95%CI 0.3-0.7). There was, however, no association with use of biomass (OR 1.0, 95%CI 0.8-1.4). When analysis was restricted to long-term users and non-users of biomass, results were similar except that there was a suggestion of a weak association with exposure to biomass (OR 1.3, 95%CI 0.9-1.9).

In corresponding analyses with previous history of heart attack (diagnosed by a physician) as an outcome, initial models with adjustment only for age indicated associations ( $p < 0.1$ ) with age, higher household income, higher number of household assets, and high BMI or WHR (Supplementary Table 6). After mutual adjustment, age remained a significant risk factor (OR 1.5, 95%CI 1.2-2.0, for each 10-year increase in age). However, the other associations, although still positive, were not significant at a 5% level. Nor was there an association with use of biomass for cooking (OR 1.2, 95%CI 0.7-2.2). In the mutually adjusted model for long-term use of biomass, results were very similar.

In analyses adjusted only for age, household income was the only variable significantly associated with definite or probable CHD on ECG, and it remained significant in the fully adjusted model (OR 1.6, 95%CI 1.1-2.4 for household income  $> 10,000$ PKR) (Supplementary Table 7). However, there was no association with use of biomass for cooking, either overall or in the long-term (ORs 0.8 and 0.9).

## Discussion

This study found no association between use of biomass fuel and any of the four outcomes studied (hypertension, angina, previous history of heart attack, and definite or probable CHD on ECG), even when comparison was with women who had not used biomass for at least the last 10 years. The strongest hint of an association was for angina in long-term users as compared with long-term non-users of biomass, but the elevation of risk was small (30%) and not statistically significant at a 5% level.

The choice of villages from which to recruit participants ensured a balance in the fuels currently used for cooking, and cooperation in the survey was good with high response rates from the households and women that were invited to take part. Inevitably, recruitment was to some extent opportunistic and limited to one province of Pakistan. However, there seems no reason to expect that the study sample would have been seriously unrepresentative in the associations of hypertension and CHD with use of biomass and other risk factors.

A linked air monitoring study found that in the kitchens of houses using biomass for cooking, the mean 24-hour  $PM_{2.5}$  concentration was  $531 \mu\text{g}/\text{m}^3$ , with a median of  $136 \mu\text{g}/\text{m}^3$  and inter-quartile



1  
2  
3 range 34-615  $\mu\text{g}/\text{m}^3$  (paper in preparation). Corresponding concentrations in houses not using  
4 biomass for cooking were 69.9, 24.2, and 13.5-53.3  $\mu\text{g}/\text{m}^3$ . Thus, while individual exposures may  
5 have been influenced also by time spent cooking and whether biomass was burned in a closed or open  
6 kitchen, the absence of associations with CHD and hypertension is unlikely to reflect inadequate  
7 contrasts in recent intensity of exposure.  
8

9  
10 Our aim was as far as possible to recruit households that had used the same fuel for cooking  
11 exclusively for at least past 10 years. Villages were selected with this criterion in mind, and it was  
12 covered in preliminary inquiries that were addressed to local community representatives. In practice,  
13 however, it turned out that where natural gas was available in villages, some participants had not yet  
14 switched to cleaner fuel, or had done so at a later date than others. A pragmatic decision was therefore  
15 made to include women even if they had changed their cooking fuel within the past 10 years, provided  
16 that they had used their current fuel for at least a year. This seemed reasonable since trials had  
17 suggested that interventions to reduce HAP from use of biomass for cooking can produce reductions  
18 in blood pressure and changes in ECGs over the short to medium term [39-41]. However, to check  
19 that it did not obscure associations, additional analyses were carried out with restriction to long-term  
20 users and non-users of biomass, and still no relationship was found with the health outcomes.  
21

22  
23 The sample size achieved for the study was close to that planned, and the prevalence of the four  
24 outcomes was higher than had been assumed in the power calculations. Moreover, the upper  
25 confidence limits for the odds ratios relating to use of biomass were almost all  $<2$ . Thus, the absence  
26 of associations with biomass does not reflect a lack of statistical power.  
27

28  
29 Ascertainment of current use of biomass is likely to have been highly accurate, and while there may  
30 have been some errors in recall of the times when biomass had been used in the past, it is difficult to  
31 conceive that any resultant misclassification would have obscured important associations with CHD.  
32 Generally, switches in the use of fuel were only in one direction – towards cleaner natural gas from  
33 biomass. The timing of changes was usually well recalled because in most instances the entire village  
34 received the new source of fuel in a particular year. However, the duration of using cow dung and  
35 firewood may not always have been remembered reliably, and switches between these types of fuel  
36 could also have occurred. Many women reported using cow dung and firewood for the same duration,  
37 and no attempt was made to analyse them separately.  
38

39  
40 Recall of some potentially confounding exposures may also have been inaccurate – particularly those  
41 pertaining to childhood. If so, the errors would be expected to be non-differential with respect to  
42 CHD, and therefore to bias risk estimates towards the null, possibly leading to uncontrolled residual  
43 confounding. However, the assessment of BMI and WHR used standardized methods, and should  
44 have been reasonably reliable. The interviewers were trained in how to make the measurements, and  
45 their technique was piloted in the field before the start of data collection.  
46

47  
48 A greater concern is the possibility of error in the ascertainment of outcomes. Blood pressure was  
49 objectively measured according to a standardized protocol, and was taken as the average of three  
50 readings. Moreover, most of the women who were classed as having hypertension were taking  
51 treatment for the disorder, which supports the validity of its assessment. Angina was determined  
52 through the well-established Rose questionnaire, but it is possible that symptoms in some cases arose  
53 from other pathology. Previous research has suggested that the Rose angina questionnaire may not be  
54 as reliable among women as in men [42]. Although the question to participants about history of heart  
55 attack referred specifically to diagnoses that had been given by a health professional, errors could  
56 have occurred in interpretation of the term “heart attack” (e.g. to include symptoms from  
57 dysrhythmias and acute heart failure as well as myocardial infarction). However, ascertainment of  
58 heart attack had been previously carried out by the same method in a similar population, where it was  
59 found to be reasonably accurate [43].  
60

The diagnosis of CHD from ECGs showed only a weak relationship to history of medically diagnosed  
heart attack, and none at all to symptoms of angina (Supplementary Table 3). Between observer

1  
2  
3 agreement in the classification of ECGs was reasonably good ( $\kappa = 0.57$ ) (Supplementary Table  
4 2), but it is notable that unlike angina and history of heart attack, CHD diagnosed from ECGs did not  
5 show the expected association with age (Supplementary Table 7).  
6

7 To the extent that errors did occur in the ascertainment of outcomes, they are unlikely to have differed  
8 systematically in relation to use of biomass, and therefore would be expected to tend to obscure any  
9 true associations.  
10

11 Because the study had a cross-sectional design, consideration must be given to the possibility of  
12 reverse causation. For risk factors related to childhood (e.g. birthweight, father's occupation and  
13 education), this is less of a concern. However, it is plausible that characteristics such as diet, physical  
14 activity and time spent cooking could have changed as a consequence of CHD. Depending on the  
15 circumstances, this might bias associations either upwards or downwards.  
16

17 Another limitation of the study was that it did not determine when past heart attacks had occurred.  
18 Even if not as a consequence of an earlier heart attack, some of the exposures studied (e.g. BMI and  
19 WHR) may have changed in the interval since such an attack occurred. If so, this might obscure true  
20 associations.  
21

22 A further possible source of error was uncontrolled residual confounding. To minimize this problem,  
23 information was collected about a range of potentially confounding variables, and as in most studies  
24 of biomass fuel, socio-economic status tended to be higher in women using cleaner fuels [44].  
25 Although several socio-economic indicators were evaluated as possible factors for adjustment,  
26 residual confounding could still have occurred. To explain the absence of associations with biomass,  
27 such confounding would have to be inverse (i.e. the under-ascertained confounder would have to be  
28 less prevalent in women who used biomass than in non-users).  
29

30 The study found expected associations with several established risk factors for CHD. Thus, the odds  
31 of hypertension, angina and previous history of heart attack were all higher with older age (by 30-  
32 50% for every 10-year increase), although this was not found for definite or probable CHD on ECG.  
33 The relationship of CHD to age is well documented in the literature [45], and in women, the incidence  
34 of CHD increases rapidly after the menopause, reaching up to three times that in premenopausal  
35 women [46].  
36

37 Two of the outcome measures – hypertension and previous history of heart attack – were significantly  
38 associated with affluence as measured by number of household assets. This relationship has also been  
39 observed before. In a population-based study in Pakistan, history of 'angina or heart attack' was  
40 estimated to have 3-fold higher prevalence among affluent participants than in those who were poor  
41 [47]. The direction of the association, which is the inverse of that observed in western populations,  
42 accords with a higher prevalence of diabetes, hypertension and dyslipidaemias in more educated and  
43 affluent groups, which was found in a recent study conducted in South Asian countries, including  
44 Pakistan [48].  
45

46 In further support of an effect of affluence, we found that high BMI and/or WHR was associated with  
47 greater risk of hypertension, and (non-significantly) with history of heart attack. Obesity has been  
48 shown to increase the risk of hypertension in several studies [49, 50], and partly through this  
49 mechanism, also increases the risk and progression of CHD [51]. The INTERHEART study suggested  
50 that WHR (abdominal obesity) is a better marker of risk for CHD than BMI [52], but the two were  
51 correlated in our study sample, and we opted to use a combined measure.  
52

53 In contrast, we found that more frequent consumption of meat and eggs was associated with reduced  
54 risk of angina. This was unexpected given the known relationship of CHD to consumption of  
55 saturated fat [53], and may have been a chance finding. It did not extend to the other outcomes  
56 investigated. However, a recent large global review of the literature on saturated fats suggests that this  
57 relationship may be inconsistent [54].  
58  
59  
60



1  
2  
3  
4 Smoking has consistently been found to increase the risk of CHD in many studies [55]. However, in  
5 our investigation it was associated only with angina. This might be because intensity of tobacco use  
6 among female smokers in the Pakistani population is low [56].  
7

8 Despite the finding of several expected associations, the failure to demonstrate more consistent  
9 relationships to known risk factors is a further indication for caution in the interpretation of our  
10 results.  
11

12 Several earlier studies have indicated links between use of biomass for cooking and CHD, although  
13 the finding has not been entirely consistent [17,18]. As already discussed, one explanation for our  
14 failure to demonstrate such associations in the current study could be inaccuracies in the diagnosis of  
15 CHD. Another possibility, however, is that adverse effects of exposure to pollutants from the use of  
16 biomass persist many years after last exposure. In this survey, even among women who had not used  
17 biomass during the last 10 years, most had done so earlier, and often for a long time. Only a few  
18 participants (about 3.5% overall) had never used biomass, which was too few for meaningful risk  
19 estimates. While it would be possible to compare rural users of biomass with lifelong users of cleaner  
20 fuels in urban settings, interpretation would be complicated by other important differences between  
21 those living in rural and urban areas.  
22  
23

## 24 **Conclusions**

25 This study evaluated the association of hypertension and three measures of CHD – angina, previous  
26 history of heart attack and definite or probable CHD on ECG - with use of biomass for cooking. We  
27 found no clear associations with any of the health outcomes. However, the weak relationship of ECG  
28 abnormalities to the other two measures of CHD, and the inconsistency of their associations with  
29 well-established risk factors, suggest that this could have been because of diagnostic misclassification.  
30 Alternatively, it could be that an effect was missed because most of the women who were not  
31 currently using biomass for cooking had used it in the past, and risk remains elevated for many years  
32 after last exposure.  
33  
34

## 35 **Data Availability**

36  
37 The data [stata.dta format] underpinning the findings of this study are available from the  
38 corresponding author upon reasonable request.  
39  
40

## 41 **Acknowledgments**

42  
43 The study reported in this paper formed part of a PhD project carried out by Dr Zafar Fatmi under the  
44 supervision of Professor David Coggon at the University of Southampton, UK.  
45  
46

47 Mr Syed Nayab Ali Shah coordinated the data collection. Ms Shereen Jamali, Ms Fozia Jamali, Ms  
48 Iqra Memon and Ms Sana Memon administered the questionnaires at interview and recorded the  
49 ECGs. We are grateful also to Professor Keith Palmer and Professor M. Masood Kadir for their  
50 advice on various aspects of the study.  
51  
52  
53  
54  
55  
56  
57  
58  
59  
60

## References

1. Bonjour S, Adair-Rohani H, Wolf J, Bruce NG, Mehta S, Prüss-Ustün A, Lahiff M, Rehfuess EA, Mishra V, Smith KR. Solid fuel use for household cooking: country and regional estimates for 1980-2010. *Environ Health Perspect*. 2013; 121:784-90.
2. World Health Organization. Household air pollution and health. Geneva, Switzerland. (Accessed on 4 April 2018). <http://www.who.int/mediacentre/factsheets/fs292/en/>
3. World Health Organization. Ambient (outdoor) air quality and health [Internet]. Geneva; 2018 [updated 2 May 2018]. Available from: [https://www.who.int/news-room/fact-sheets/detail/ambient-\(outdoor\)-air-quality-and-health](https://www.who.int/news-room/fact-sheets/detail/ambient-(outdoor)-air-quality-and-health)
4. Naeher LP, Brauer M, Lipsett M, Zelikoff JT, Simpson CD, Koenig JQ, et al. Woodsmoke health effects: a review. *Inhal Toxicol*. 2007;19(1):67-106. Review.
5. Clark ML, Peel JL, Balakrishnan K, Breyse PN, Chilrud SN, Naeher LP et al. Health and household air pollution from solid fuel use: the need for improved exposure assessment. *Environ Health Perspect* 2013; 121:1120-8.
6. Smith KR, Samet JM, Romieu I, Bruce N. Indoor air pollution in developing countries and acute lower respiratory infections in children. *Thorax*. 2000 Jun;55(6):518-32.
7. Smith KR, Mehta S, Maeusezahl-Feuz M. Indoor air pollution from household use of solid fuels: comparative quantification of health risks. In: Ezzati MLA, Rodgers A, Murray CJL, editors. Global and regional burden of disease attributable to selected major risk factors. Geneva, Switzerland: World Health Organization; 2004. pp. 1435–1493.
8. Torres-Duque C, Maldonado D, Pérez-Padilla R, Ezzati M, Viegi G; Forum of International Respiratory Studies (FIRS) Task Force on Health Effects of Biomass Exposure. Biomass fuels and respiratory diseases: a review of the evidence. *Proc Am Thorac Soc*. 2008 Jul 15;5(5):577-90.
9. Liu Y, Lee K, Perez-Padilla R, Hudson NL, Mannino DM. Outdoor and indoor air pollution and COPD-related diseases in high- and low-income countries. *Int J Tuberc Lung Dis*. 2008;12(2):115-27.
10. Kurmi OP, Semple S, Simkhada P, Smith WC, Ayres JG. COPD and chronic bronchitis risk of indoor air pollution from solid fuel: a systematic review and meta-analysis. *Thorax*. 2010; 65(3):221-8.
11. Liu Q, Sasco AJ, Riboli E et al. Indoor air pollution and lung cancer in Guangzhou, People's Republic of China. *Am. J. Epidemiol*. 1993; 137: 145–54.
12. Kleinerman R, Wang Z, Lubin J, Zhang S, Metayer C, Brenner A. Lung cancer and indoor air pollution in rural china. *Ann Epidemiol*. 2000;10(7):469.
13. Behera D, Balamugesh T. Indoor air pollution as a risk factor for lung cancer in women. *J Assoc Physicians India*. 2005; 53:190-2.
14. Amegah AK, Quansah R, Jaakkola JJ. Household air pollution from solid fuel use and risk of adverse pregnancy outcomes: a systematic review and meta-analysis of the empirical evidence. *PloS one*. 2014 Dec 2;9(12): e113920.
15. Lamichhane DK, Leem JH, Lee JY, Kim HC. A meta-analysis of exposure to particulate matter and adverse birth outcomes. *Environ Health Toxicol*. 2015 Nov 3;30: e2015011.
16. Calderón-Garcidueñas L, Torres-Jardón R, Kulesza RJ, Park SB, D'Angiulli A. Air pollution and detrimental effects on children's brain. The need for a multidisciplinary approach to the issue complexity and challenges. *Front Hum Neurosci*. 2014; 8:613.
17. Fatmi Z, Coggon D. Coronary heart disease and household air pollution from use of solid fuel: a systematic review. *Br Med Bull*. 2016 Jun;118(1):91-109.

18. Yu K, Qui G, Chan K-H, Lam K-BH, Kurmi OP, Bennett DA et al. Association of solid fuel use with risk of cardiovascular and all-cause mortality in rural China. *JAMA* 2018; 319:1351-61.
19. Sathiakumar N. Indoor air pollution due to biomass fuel use and acute coronary syndrome among Sri Lankan women. *Epidemiology* 2012;23: S224.
20. Fatmi Z, Coggon D, Kazi A, Naeem I, Kadir MM, Sathiakumar N. Solid fuel use is a major risk factor for acute coronary syndromes among rural women: a matched case control study. *Public Health*. 2014 Jan;128(1):77-82. doi: 10.1016/j.puhe.2013.09.005.
21. Kim C, Shu X-O, Hosgood HD, et al. Past use of coal for cooking is associated with all-cause mortality in the prospective Shanghai women's health study. *Cancer Res* 2014;74:Abstract nr 2184.
22. Lee M-S, Hang J-Q, Zhang F-Y, et al. In-home solid fuel use and cardiovascular disease: a cross-sectional analysis of the Shanghai Putuo study. *Environ Health* 2012;11:18.
23. Mitter SS, Islami F, Pourshams A, et al. Use of biomass fuels for cooking and heating is associated with increased non-communicable disease mortality: Golestan cohort study. *Circulation* 2012;125: AP042.
24. Alam DS, Chowdhury MAH, Siddique AT, et al. Adult cardiopulmonary mortality and indoor air pollution: a 10-year retrospective cohort study in a low-income rural setting. *Glob Heart* 2012; 7:215–21.
25. Baumgartner J, Schauer JJ, Ezzati M, et al. Indoor air pollution and blood pressure in adult women living in rural China. *Environ Health Perspect* 2011; 119:1390–5.
26. Painschab MS, Davila-Roman VG, Gilman RH, et al. Chronic exposure to biomass fuel is associated with increased carotid artery intima-media thickness and a higher prevalence of atherosclerotic plaque. *Heart* 2013; 99:984–91.
27. Burroughs Peña M, Romero KM, Velazquez EJ, et al. Relationship between daily exposure to biomass fuel smoke and blood pressure in high-altitude Peru. *Hypertension* 2015; 65:1134–40.
28. Neupane M, Basnyat B, Fischer R, et al. Sustained use of biogas fuel and blood pressure among women in rural Nepal. *Environ Res* 2015;136: 343–51.
29. Ray MR, Mukherjee S, Roychoudhury S, et al. Platelet activation, upregulation of CD11b/CD18 expression on leukocytes and increase in circulating leukocyte-platelet aggregates in Indian women chronically exposed to biomass smoke. *Hum Exp Toxicol* 2006; 25:627–35.
30. Dutta A, Mukherjee B, Das D, et al. Hypertension with elevated levels of oxidized low-density lipoprotein and anticardiolipin antibody in the circulation of premenopausal Indian women chronically exposed to biomass smoke during cooking. *Indoor Air* 2011;21: 165–76.
31. Dutta A, Ray MR, Banerjee A. Systemic inflammatory changes and increased oxidative stress in rural Indian women cooking with biomass fuels. *Toxicol Appl Pharmacol* 2012; 261:255–62.
32. Davutoglu V, Zengin S, Sari I, et al. Chronic carbon monoxide exposure is associated with the increases in carotid intima-media thickness and C-reactive protein level. *Tohoku J Exp Med* 2009; 219:201–6.
33. Clark ML, Bazemore H, Reynolds SJ, et al. A baseline evaluation of traditional cook stove smoke exposures and indicators of cardiovascular and respiratory health among Nicaraguan women. *Int J Occup Environ Health* 2011; 17:113–21.
34. Rose G, McCartney P, Reid DD. Self-administration of a questionnaire on chest pain and intermittent claudication. *Br J Prev Soc Med*. 1977; 31:42–48.

- 1
- 2
- 3
- 4 35. Prineas RJ, Crow RS, Zhang Z-h. The Minnesota code manual of
- 5 electrocardiographic findings. 2nd Edition. London. Springer London; 2010.
- 6 36. Christiansen TB and Lauritsen JM. (Ed.) EpiData - Comprehensive Data Management
- 7 and Basic Statistical Analysis System. Odense Denmark, EpiData Association, 2010-.
- 8 <http://www.epidata.dk>
- 9 37. Stata Corp LP 2012, Stata Statistical Software: Release 12.0, College Station TX,
- 10 USA.
- 11 38. Jafar TH, Qadri Z, Chaturvedi N. Coronary artery disease epidemic in Pakistan: more
- 12 electrocardiographic evidence of ischaemia in women than in men. *Heart*.
- 13 2008;94(4):408-13.
- 14 39. McCracken J, Smith KR, Stone P, Diaz A, Arana B, Schwartz J. Intervention to lower
- 15 household wood smoke exposure in Guatemala reduces ST-segment depression on
- 16 electrocardiograms. *Environ Health Perspect* 2011;119:1562-8.
- 17 40. McCracken JP, Smith KR, Diaz A, Mittleman MA, Schwartz J. Chimney stove
- 18 intervention to reduce long-term wood smoke exposure lowers blood pressure among
- 19 Guatemalan women. *Environ Health Perspect* 2007; 115:996-1001.
- 20 41. Alexander D, Larson T, Bolton S, Vedal S. Systolic blood pressure changes in
- 21 indigenous Bolivian women associated with an improved cookstove intervention. *Air*
- 22 *Qual Atmos Health* 2015; 8:47-53.
- 23 42. Wilcosky T, Harris R, Weissfeld L. The prevalence and correlates of Rose
- 24 questionnaire angina among women and men in the Lipid Research Clinics Program
- 25 Prevalence Study. *Am J Epidemiol*. 1987;125 (3):400-409.
- 26 43. Jafar TH, Jafary FH, Jessani S, Chaturvedi N. Heart disease epidemic in Pakistan:
- 27 women and men at equal risk. *Am Heart J*. 2005;150(2):221-6.
- 28 44. Khushk WA, Fatmi Z, White F, Kadir MM. Health and social impacts of improved
- 29 stoves on rural women: a pilot intervention in Sindh, Pakistan. *Indoor Air*. 2005
- 30 *Oct*;15(5):311-6.
- 31 45. Castelli WP. Epidemiology of coronary heart disease: The Framingham study.
- 32 *American Journal of Medicine* 1984, page 4.
- 33 46. Gordon T, Kannel WB, Hjortland MC, McNamara PM. Menopause and coronary
- 34 heart disease. The Framingham Study. *Ann Intern Med*. 1978; 89:157-61.
- 35 47. Hameed K, Kadir M, Gibson T, Sultana S, Fatima Z, Syed A. The frequency of
- 36 known diabetes, hypertension and ischaemic heart disease in affluent and poor urban
- 37 populations of Karachi, Pakistan. *Diabet Med*. 1995;12(6):500-3.
- 38 48. Ali MK, Bhaskarapillai B, Shivashankar R, Mohan D, Fatmi Z, Pradeepa R, Masood
- 39 Kadir M, Mohan V, Tandon N, Narayan KM, Prabhakaran D; CARRS investigators.
- 40 Socioeconomic status and cardiovascular risk in urban South Asia: The CARRS
- 41 Study. *Eur J Prev Cardiol*. 2016 Mar;23(4):408-19.
- 42 49. Hubert HB, Feinleib M, McNamara PM, Castelli WP. Obesity as an independent risk
- 43 factor for cardiovascular disease: a 26-year follow-up of participants in the
- 44 Framingham Heart Study. *Circulation* 1983; 67:968-77.
- 45 50. Todd Miller M, Lavie CJ, White CJ. Impact of obesity on the pathogenesis and
- 46 prognosis of coronary heart disease. *J Cardiometab Syndrome* 2008; 3:162-7.
- 47 51. Prospective Studies Collaboration. Age-specific relevance of usual blood pressure to
- 48 vascular mortality: a meta-analysis of individual data for one million adults in 61
- 49 prospective studies. *Lancet*. 2002;360: 1903-13.
- 50 52. Yusuf S, Hawken S, Ounpuu S, Bautista L, Franzosi MG, Commerford P, Lang CC,
- 51 Rumboldt Z, Onen CL, Lisheng L, Tanomsup S, Wangai P Jr, Razak F, Sharma AM,
- 52 Anand SS; INTERHEART Study Investigators. Obesity and the risk of myocardial
- 53
- 54
- 55
- 56
- 57
- 58
- 59
- 60

- 1  
2  
3 infarction in 27,000 participants from 52 countries: a case-control study. *Lancet*  
4 2005;366(9497):1640-9.  
5  
6 53. The World Health Report 2002: reducing risks, promoting healthy life. Geneva,  
7 World Health Organization, 2002.  
8  
9 54. Chowdhury R, Warnakula S, Kunutsor S, Crowe F, Ward HA, Johnson L, Franco  
10 OH, Butterworth AS, Forouhi NG, Thompson SG, Khaw KT, Mozaffarian D, Danesh  
11 J, Di Angelantonio E. Association of dietary, circulating, and supplement fatty acids  
12 with coronary risk: a systematic review and meta-analysis. *Ann Intern Med.* 2014 Mar  
13 18;160(6):398-406. doi: 10.7326/M13-1788.  
14  
15 55. Huxley RR, Woodward, M. Cigarette smoking as a risk factor for coronary heart  
16 disease in women compared with men: a systematic review and meta-analysis of  
17 prospective cohort studies. *Lancet.* 2011;378(9799):1297-305.  
18  
19 56. Global Adult Tobacco Survey. Pakistan Fact sheet 2014.  
20 <http://www.who.int/tobacco/surveillance/survey/gats/pakfactsheet.pdf>  
21  
22  
23  
24  
25  
26  
27  
28  
29  
30  
31  
32  
33  
34  
35  
36  
37  
38  
39  
40  
41  
42  
43  
44  
45  
46  
47  
48  
49  
50  
51  
52  
53  
54  
55  
56  
57  
58  
59  
60

**Table 1.** Demographic and socioeconomic characteristics of participants by exposure category.

| Characteristics                         | All women (n=850) |        | Users of biomass (n=436) |        | Non-users of biomass (n=414) |        | Long-term users of biomass (n=430) |        | Long-term non-users of biomass (n=263) |        |
|-----------------------------------------|-------------------|--------|--------------------------|--------|------------------------------|--------|------------------------------------|--------|----------------------------------------|--------|
|                                         | n                 | (%)    | n                        | (%)    | n                            | (%)    | n                                  | (%)    | n                                      | (%)    |
| <b>Age (years)</b>                      |                   |        |                          |        |                              |        |                                    |        |                                        |        |
| <50                                     | 525               | (61.8) | 263                      | (60.3) | 262                          | (63.3) | 257                                | (59.8) | 166                                    | (63.1) |
| ≥50                                     | 325               | (38.2) | 173                      | (39.7) | 152                          | (36.7) | 173                                | (40.2) | 97                                     | (36.9) |
| <b>Educational status</b>               |                   |        |                          |        |                              |        |                                    |        |                                        |        |
| No literacy                             | 797               | (93.8) | 419                      | (96.1) | 378                          | (91.3) | 413                                | (96.1) | 239                                    | (90.9) |
| Any literacy                            | 53                | (6.2)  | 17                       | (3.9)  | 36                           | (8.7)  | 17                                 | (4.0)  | 24                                     | (9.1)  |
| <b>Household income/month</b>           |                   |        |                          |        |                              |        |                                    |        |                                        |        |
| ≤10000PKR                               | 651               | (76.6) | 351                      | (80.5) | 300                          | (72.5) | 347                                | (80.7) | 185                                    | (70.3) |
| >10000PKR                               | 199               | (23.4) | 85                       | (19.5) | 114                          | (27.5) | 83                                 | (19.3) | 78                                     | (29.7) |
| <b>Household tenure</b>                 |                   |        |                          |        |                              |        |                                    |        |                                        |        |
| Rented                                  | 70                | (8.2)  | 25                       | (5.7)  | 45                           | (10.9) | 25                                 | (5.8)  | 20                                     | (7.6)  |
| Owned                                   | 780               | (91.8) | 411                      | (94.3) | 369                          | (89.1) | 405                                | (94.2) | 243                                    | (92.4) |
| <b>Construction of house</b>            |                   |        |                          |        |                              |        |                                    |        |                                        |        |
| Katcha/ semi-pucca                      | 652               | (76.7) | 361                      | (82.8) | 291                          | (70.3) | 356                                | (82.8) | 173                                    | (65.8) |
| Pucca                                   | 198               | (23.3) | 75                       | (17.2) | 123                          | (29.7) | 74                                 | (17.2) | 90                                     | (34.2) |
| <b>Number of household assets</b>       |                   |        |                          |        |                              |        |                                    |        |                                        |        |
| Low (0-1)                               | 268               | (31.5) | 140                      | (32.1) | 128                          | (30.9) | 139                                | (32.3) | 84                                     | (31.9) |
| Medium (2-3)                            | 404               | (47.5) | 223                      | (51.2) | 181                          | (43.7) | 218                                | (50.7) | 108                                    | (41.1) |
| High (≥4)                               | 178               | (21.0) | 73                       | (16.7) | 105                          | (25.4) | 73                                 | (17.0) | 71                                     | (27.0) |
| <b>Father's occupation in childhood</b> |                   |        |                          |        |                              |        |                                    |        |                                        |        |
| Non-manual                              | 39                | (4.6)  | 19                       | (4.4)  | 20                           | (4.8)  | 18                                 | (4.2)  | 16                                     | (6.1)  |
| Manual                                  | 811               | (95.4) | 417                      | (95.6) | 394                          | (95.2) | 412                                | (95.8) | 247                                    | (93.9) |



**Table 2.** Current and past cooking arrangements according to exposure category.

| Characteristics                                           | Users of biomass<br>(n=436) |        | Non-users of<br>biomass<br>(n=414) |        | Long-term users<br>of biomass<br>(n=430) |        | Long-term non-users<br>of biomass<br>(n=263) |        |
|-----------------------------------------------------------|-----------------------------|--------|------------------------------------|--------|------------------------------------------|--------|----------------------------------------------|--------|
|                                                           | n                           | (%)    | n                                  | (%)    | n                                        | (%)    | n                                            | (%)    |
| <b><i>Ever used biomass for cooking</i></b>               | 436                         | (100)  | 382                                | (92.3) | 430                                      | (100)  | 231                                          | (87.8) |
| <b><i>Years since last used biomass for cooking</i></b>   |                             |        |                                    |        |                                          |        |                                              |        |
| Current user                                              | 436                         | (100)  | -                                  | -      | 430                                      | (100)  | -                                            | -      |
| 2-9                                                       | -                           | -      | 151                                | (39.5) | -                                        | -      | -                                            | -      |
| ≥10                                                       | -                           | -      | 231                                | (60.5) | -                                        | -      | 231                                          | (100)  |
| <b><i>Ever used wood for cooking</i></b>                  | 435                         | (99.8) | 358                                | (86.5) | 429                                      | (99.8) | 218                                          | (82.9) |
| <b><i>Ever used cow dung for cooking</i></b>              | 422                         | (96.8) | 358                                | (86.5) | 416                                      | (96.7) | 216                                          | (82.1) |
| <b><i>Ever used kerosene for cooking</i></b>              | 16                          | (3.7)  | 26                                 | (6.3)  | 16                                       | (3.7)  | 17                                           | (6.5)  |
| <b><i>Ever used LPG/natural gas for cooking</i></b>       | 17                          | (3.9)  | 413                                | (99.8) | 15                                       | (3.5)  | 263                                          | (100)  |
| <b><i>Average hours per day cooked in past year</i></b>   |                             |        |                                    |        |                                          |        |                                              |        |
| ≤1                                                        | 129                         | (29.6) | 133                                | (32.1) | 123                                      | (28.6) | 75                                           | (28.5) |
| 2-3                                                       | 270                         | (61.9) | 237                                | (57.3) | 270                                      | (62.8) | 165                                          | (62.7) |
| ≥4                                                        | 37                          | (8.5)  | 44                                 | (10.6) | 37                                       | (8.6)  | 23                                           | (8.8)  |
| <b><i>Type of stove used for cooking</i></b>              |                             |        |                                    |        |                                          |        |                                              |        |
| Gas/LPG                                                   | 2                           | (0.5)  | 414                                | (100)  | 2                                        | (0.5)  | 263                                          | (100)  |
| Biomass with chimney/improved stove                       | 166                         | (38.1) | -                                  | -      | 164                                      | (38.1) | -                                            | -      |
| Biomass with three brick open stove                       | 267                         | (61.2) | -                                  | -      | 263                                      | (61.2) | -                                            | -      |
| Other                                                     | 1                           | (0.2)  | -                                  | -      | 1                                        | (0.2)  | -                                            | -      |
| <b><i>Type of kitchen</i></b>                             |                             |        |                                    |        |                                          |        |                                              |        |
| Closed (four walls – linked with living room or separate) | 88                          | (20.2) | 116                                | (28.0) | 86                                       | (20.0) | 79                                           | (30.0) |
| Semi-open (fewer than four walls)                         | 189                         | (43.3) | 155                                | (37.4) | 187                                      | (43.5) | 94                                           | (35.7) |
| Open (no walls)                                           | 159                         | (36.5) | 143                                | (34.5) | 157                                      | (36.5) | 90                                           | (34.2) |
| <b><i>Heat home with biomass</i></b>                      | 237                         | (54.4) | 106                                | (25.6) | 236                                      | (54.9) | 74                                           | (28.1) |



**Table 3.** Distribution of risk factors across the four exposure categories.

| Characteristics                                                                                                       | Users of biomass (n=436) |        | Non-users of biomass (n=414) |        | Long-term users of biomass (n=430) |        | Long-term non-users of biomass (n=263) |        |
|-----------------------------------------------------------------------------------------------------------------------|--------------------------|--------|------------------------------|--------|------------------------------------|--------|----------------------------------------|--------|
|                                                                                                                       | n                        | (%)    | n                            | (%)    | n                                  | (%)    | n                                      | (%)    |
| <b>Birthweight</b>                                                                                                    |                          |        |                              |        |                                    |        |                                        |        |
| Lower than normal                                                                                                     | 117                      | (26.8) | 77                           | (18.6) | 114                                | (26.5) | 54                                     | (20.5) |
| Normal                                                                                                                | 239                      | (54.8) | 254                          | (61.4) | 237                                | (55.1) | 156                                    | (59.3) |
| Higher than normal                                                                                                    | 80                       | (18.4) | 83                           | (20.0) | 79                                 | (18.4) | 53                                     | (20.2) |
| <b>Ever hungry all the time during childhood because there was not enough food</b>                                    |                          |        |                              |        |                                    |        |                                        |        |
| No                                                                                                                    | 176                      | (40.4) | 176                          | (42.5) | 175                                | (40.7) | 122                                    | (46.4) |
| Yes                                                                                                                   | 260                      | (59.6) | 238                          | (57.5) | 255                                | (59.3) | 141                                    | (53.6) |
| <b>Lost weight during childhood</b>                                                                                   |                          |        |                              |        |                                    |        |                                        |        |
| No                                                                                                                    | 162                      | (37.2) | 182                          | (44.0) | 160                                | (37.2) | 119                                    | (45.2) |
| Yes                                                                                                                   | 274                      | (62.8) | 232                          | (56.0) | 270                                | (62.8) | 144                                    | (54.8) |
| <b>Ever smoked regularly (any of cigarettes, bidi, huqqa)</b>                                                         |                          |        |                              |        |                                    |        |                                        |        |
| Never                                                                                                                 | 390                      | (89.4) | 378                          | (91.3) | 384                                | (89.3) | 240                                    | (91.3) |
| Ever                                                                                                                  | 46                       | (10.6) | 36                           | (8.7)  | 46                                 | (10.7) | 23                                     | (8.7)  |
| <b>Environmental tobacco smoke (at least one other household member smoked cigarettes, bidi or huqqa in the home)</b> |                          |        |                              |        |                                    |        |                                        |        |
| No                                                                                                                    | 269                      | (61.7) | 267                          | (64.5) | 265                                | (61.6) | 173                                    | (65.8) |
| Yes                                                                                                                   | 167                      | (38.3) | 147                          | (35.5) | 165                                | (38.4) | 90                                     | (34.2) |
| <b>Physical activity score</b>                                                                                        |                          |        |                              |        |                                    |        |                                        |        |
| 0-2                                                                                                                   | 124                      | (28.4) | 205                          | (49.5) | 124                                | (28.8) | 149                                    | (56.7) |
| 3-4                                                                                                                   | 199                      | (45.6) | 156                          | (37.7) | 196                                | (45.6) | 91                                     | (34.6) |
| 5-6                                                                                                                   | 113                      | (25.9) | 53                           | (12.8) | 110                                | (25.6) | 23                                     | (8.7)  |
| <b>Consumption of meat or eggs</b>                                                                                    |                          |        |                              |        |                                    |        |                                        |        |
| Do not eat either meat or eggs as much as once per week                                                               | 173                      | (39.7) | 142                          | (34.3) | 172                                | (40.0) | 88                                     | (33.5) |
| Eat one of meat or eggs as much as once per week                                                                      | 176                      | (40.4) | 163                          | (39.4) | 173                                | (40.2) | 100                                    | (38.0) |
| Eat both meat and eggs at least once per week                                                                         | 87                       | (20.0) | 109                          | (26.3) | 85                                 | (19.8) | 75                                     | (28.5) |
| <b>Current nutrition<sup>a</sup></b>                                                                                  |                          |        |                              |        |                                    |        |                                        |        |
| Neither BMI nor WHR high                                                                                              | 183                      | (42.0) | 129                          | (31.2) | 179                                | (41.6) | 79                                     | (30.0) |
| One of BMI or WHR high                                                                                                | 151                      | (34.6) | 160                          | (38.7) | 149                                | (34.7) | 101                                    | (38.4) |
| Both BMI and WHR high                                                                                                 | 102                      | (23.4) | 124                          | (30.0) | 102                                | (23.7) | 82                                     | (31.2) |
| Not known                                                                                                             | 0                        | (0)    | 1                            | (0.2)  | 0                                  | (0)    | 1                                      | (0.4)  |

<sup>a</sup>BMI (kg/m<sup>2</sup>) ≥25= high; WHR ≥0.85=high.

**Table 4.** Associations of hypertension, angina, history of heart attack, and definite or probable CHD on ECG with current and long-term use of biomass for cooking.

| Outcome                                | Adjusted only for age (n=850) |           | Fully adjusted <sup>a</sup> (n=850) |           | Fully adjusted and limited to long-term users and non-users of biomass <sup>b</sup> (n=693) |           |
|----------------------------------------|-------------------------------|-----------|-------------------------------------|-----------|---------------------------------------------------------------------------------------------|-----------|
|                                        | OR                            | (95%CI)   | OR                                  | (95% CI)  | OR                                                                                          | (95% CI)  |
| <b>Hypertension</b>                    |                               |           |                                     |           |                                                                                             |           |
| Non-users of biomass                   | 1.0                           |           | 1.0                                 |           | 1.0                                                                                         |           |
| Users of biomass                       | 1.2                           | (0.9-1.5) | 1.0                                 | (0.8-1.4) | 1.1                                                                                         | (0.8-1.6) |
| <b>Angina</b>                          |                               |           |                                     |           |                                                                                             |           |
| Non-users of biomass                   | 1.0                           |           | 1.0                                 |           | 1.0                                                                                         |           |
| Users of biomass                       | 1.0                           | (0.7-1.3) | 1.0                                 | (0.8-1.4) | 1.3                                                                                         | (0.9-1.9) |
| <b>Heart Attack</b>                    |                               |           |                                     |           |                                                                                             |           |
| Non-users of biomass                   | 1.0                           |           | 1.0                                 |           | 1.0                                                                                         |           |
| Users of biomass                       | 1.4                           | (0.8-2.4) | 1.2                                 | (0.7-2.2) | 1.3                                                                                         | (0.7-2.4) |
| <b>Definite or probable CHD on ECG</b> |                               |           |                                     |           |                                                                                             |           |
| Non-users of biomass                   | 1.0                           |           | 1.0                                 |           | 1.0                                                                                         |           |
| Users of biomass user                  | 0.8                           | (0.6-1.2) | 0.8                                 | (0.6-1.2) | 0.9                                                                                         | (0.6-1.3) |

<sup>a</sup>Mutually adjusted risk estimates derived from a single regression model that included use of biomass and all of the variables that were significant ( $p < 0.1$ ) in analyses adjusted only for age

<sup>b</sup>Mutually adjusted risk estimates derived from a single regression model that included use of biomass and all of the variables that were significant ( $p < 0.1$ ) in analyses adjusted only for age, but was restricted to women who were long-term users or non-users of biomass

## Supplementary Materials

**Supplementary Table 1.** Prevalence of hypertension, history of heart attack, angina and coronary heart disease in study sample.

| Characteristic                                       | n   | (%)    |
|------------------------------------------------------|-----|--------|
| <b>Hypertension</b>                                  |     |        |
| Systolic hypertension (systolic BP $\geq$ 140 mmHg)  | 133 | (15.8) |
| Diastolic hypertension (diastolic BP $\geq$ 90 mmHg) | 102 | (12.1) |
| Regular medication for high blood pressure           | 198 | (23.5) |
| Hypertension (any of the above)                      | 297 | (35.3) |
| <b>Angina</b>                                        | 227 | (27.0) |
| <b>History of heart attack</b>                       | 54  | (6.4)  |
| <b>Definite or probable CHD on ECG<sup>a</sup></b>   | 159 | (18.9) |

<sup>a</sup>Based on 841 women. ECGs for 9 women were missing or could not be coded due to poor quality.

**Supplementary Table 2.** Classification of ECGs for definite or probable CHD by two observers.

| <b>Observer 1</b> | <b>Observer 2</b> |                 |
|-------------------|-------------------|-----------------|
|                   | <b>Negative</b>   | <b>Positive</b> |
| <b>Negative</b>   | 591               | 30              |
| <b>Positive</b>   | 94                | 122             |

**Kappa = 0.57**

For peer review only

**Supplementary Table 3.** Prevalence of definite or probable CHD changes on ECG according to history of heart attack and angina.

| Other measure of CHD                 | Definite or probable CHD changes on ECG <sup>a</sup> |        |     |        |
|--------------------------------------|------------------------------------------------------|--------|-----|--------|
|                                      | Yes                                                  |        | No  |        |
|                                      | n                                                    | (%)    | N   | (%)    |
| No history of heart attack or angina | 105                                                  | (18.2) | 471 | (81.8) |
| History of angina                    | 45                                                   | (19.8) | 182 | (80.2) |
| History of heart attack              | 14                                                   | (25.9) | 40  | (74.1) |
| History of angina or heart attack    | 54                                                   | (20.4) | 211 | (79.6) |
| History of angina and heart attack   | 5                                                    | (31.3) | 11  | (68.8) |

<sup>a</sup>ECGs for 9 women were missing or could not be coded due to poor quality.

**Supplementary Table 4.** Association of hypertension with risk factors.

| Risk factor                                                                                                                       | Adjusted only<br>for age<br>(n=850) |           | Fully adjusted <sup>a</sup><br>(n=850) |           | Fully adjusted and<br>limited to long-<br>term users and<br>non-users of<br>biomass <sup>b</sup><br>(n=693) |           |
|-----------------------------------------------------------------------------------------------------------------------------------|-------------------------------------|-----------|----------------------------------------|-----------|-------------------------------------------------------------------------------------------------------------|-----------|
|                                                                                                                                   | OR                                  | (95%CI)   | OR                                     | (95%CI)   | OR                                                                                                          | (95%CI)   |
| <b>Age (per 10 year increase)</b>                                                                                                 | 1.4                                 | (1.2-1.6) | 1.4                                    | (1.2-1.7) | 1.5                                                                                                         | (1.2-1.7) |
| <b>Educational status</b>                                                                                                         |                                     |           |                                        |           |                                                                                                             |           |
| Illiterate                                                                                                                        | 1.0                                 |           | -                                      |           | -                                                                                                           |           |
| Any literacy                                                                                                                      | 0.6                                 | (0.3-1.2) |                                        |           |                                                                                                             |           |
| <b>Household income/month</b>                                                                                                     |                                     |           |                                        |           |                                                                                                             |           |
| <3000-10000PKR                                                                                                                    | 1.0                                 |           | -                                      |           | -                                                                                                           |           |
| >10000PKR                                                                                                                         | 1.0                                 | (0.7-1.4) |                                        |           |                                                                                                             |           |
| <b>Household ownership</b>                                                                                                        |                                     |           |                                        |           |                                                                                                             |           |
| Rented                                                                                                                            | 1.0                                 |           | -                                      |           | -                                                                                                           |           |
| Own                                                                                                                               | 0.8                                 | (0.5-1.3) |                                        |           |                                                                                                             |           |
| <b>Construction of house</b>                                                                                                      |                                     |           |                                        |           |                                                                                                             |           |
| Katcha/semi-pucca                                                                                                                 | 1.0                                 |           | -                                      |           | -                                                                                                           |           |
| Pucca                                                                                                                             | 0.9                                 | (0.6-1.2) |                                        |           |                                                                                                             |           |
| <b>Number of household assets</b>                                                                                                 |                                     |           |                                        |           |                                                                                                             |           |
| 0-1                                                                                                                               | 1.0                                 |           | 1.0                                    |           | 1.0                                                                                                         |           |
| 2-3                                                                                                                               | 1.7                                 | (1.2-2.4) | 1.6                                    | (1.2-2.3) | 1.8                                                                                                         | (1.2-2.6) |
| ≥4                                                                                                                                | 2.4                                 | (1.6-3.6) | 2.3                                    | (1.5-3.4) | 2.7                                                                                                         | (1.7-4.3) |
| <b>Father's occupation in woman's<br/>childhood</b>                                                                               |                                     |           |                                        |           |                                                                                                             |           |
| Non-manual                                                                                                                        | 1.0                                 |           | -                                      |           | -                                                                                                           |           |
| Manual                                                                                                                            | 1.2                                 | (0.6-2.5) |                                        |           |                                                                                                             |           |
| <b>Birthweight</b>                                                                                                                |                                     |           |                                        |           |                                                                                                             |           |
| Lower than normal                                                                                                                 | 1.0                                 |           | -                                      |           | -                                                                                                           |           |
| Normal                                                                                                                            | 1.0                                 | (0.7-1.4) | -                                      |           | -                                                                                                           |           |
| Higher than normal                                                                                                                | 1.0                                 | (0.6-1.5) |                                        |           |                                                                                                             |           |
| <b>Ever hungry during all the time<br/>during childhood because there<br/>was not enough food</b>                                 |                                     |           |                                        |           |                                                                                                             |           |
| No                                                                                                                                | 1.0                                 |           | -                                      |           | -                                                                                                           |           |
| Yes                                                                                                                               | 0.9                                 | (0.7-1.3) |                                        |           |                                                                                                             |           |
| <b>Lost weight during childhood</b>                                                                                               |                                     |           |                                        |           |                                                                                                             |           |
| No                                                                                                                                | 1.0                                 |           | -                                      |           | -                                                                                                           |           |
| Yes                                                                                                                               | 1.2                                 | (0.9-1.6) |                                        |           |                                                                                                             |           |
| <b>Ever smoked regularly (any of<br/>cigarettes, bidi, huqqa)</b>                                                                 |                                     |           |                                        |           |                                                                                                             |           |
| Never                                                                                                                             | 1.0                                 |           | -                                      |           | -                                                                                                           |           |
| Ever                                                                                                                              | 0.8                                 | (0.5-1.3) |                                        |           |                                                                                                             |           |
| <b>Environmental tobacco smoke (at<br/>least one other household member<br/>smokes cigarettes, bidi or huqqa<br/>in the home)</b> |                                     |           |                                        |           |                                                                                                             |           |
| No                                                                                                                                | 1.0                                 |           | -                                      |           | -                                                                                                           |           |
| Yes                                                                                                                               | 0.8                                 | (0.6-1.1) |                                        |           |                                                                                                             |           |
| <b>Consumption of meat or eggs</b>                                                                                                |                                     |           |                                        |           |                                                                                                             |           |

|                                                         |     |           |     |           |     |           |
|---------------------------------------------------------|-----|-----------|-----|-----------|-----|-----------|
| Do not eat either meat or eggs as much as once per week | 1.0 |           | 1.0 |           | 1.0 |           |
| Eat one of meat or eggs as much as once per week        | 1.4 | (1.0-1.9) | 1.2 | (0.9-1.7) | 1.2 | (0.8-1.7) |
| Eat both meat and eggs at least once per week           | 1.4 | (1.0-2.1) | 1.2 | (0.8-1.8) | 1.2 | (0.8-1.9) |
| <b>Current nutrition<sup>c</sup></b>                    |     |           |     |           |     |           |
| Neither BMI nor WHR high                                | 1.0 |           | 1.0 |           | 1.0 |           |
| One of BMI or WHR high                                  | 1.2 | (0.9-1.7) | 1.2 | (0.8-1.6) | 1.2 | (0.8-1.8) |
| Both BMI and WHR high                                   | 2.0 | (1.4-2.9) | 1.9 | (1.3-2.8) | 1.8 | (1.2-2.7) |
| <b>Non-user of biomass</b>                              | 1.0 |           | 1.0 |           |     |           |
| <b>User of biomass</b>                                  | 1.2 | (0.9-1.5) | 1.0 | (0.8-1.4) |     |           |
| <b>Long-term non-user of biomass</b>                    | 1.0 |           |     |           | 1.0 |           |
| <b>Long-term user of biomass</b>                        | 1.2 | (0.9-1.7) |     |           | 1.1 | (0.8-1.6) |

<sup>a</sup>Mutually adjusted risk estimates derived from a single regression model that included use of biomass and all of the variables that were significant ( $p < 0.1$ ) in analyses adjusted only for age

<sup>b</sup>Mutually adjusted risk estimates derived from a single regression model that included use of biomass and all of the variables that were significant ( $p < 0.1$ ) in analyses adjusted only for age, but was restricted to women who were long-term users or non-users of biomass

<sup>c</sup>Body mass index (BMI) ( $\text{kg}/\text{m}^2$ )  $\geq 25$  = high; Waist-to-hip ratio (WHR)  $\geq 0.85$  = high.



**Supplementary Table 5.** Associations of angina with risk factors.

| Risk factor                                                                                                                       | Adjusted only<br>for age<br>(n=850) |           | Fully adjusted <sup>a</sup><br>(n=850) |           | Fully adjusted and<br>limited to long-<br>term users and<br>non-users of<br>biomass <sup>b</sup><br>(n=693) |           |
|-----------------------------------------------------------------------------------------------------------------------------------|-------------------------------------|-----------|----------------------------------------|-----------|-------------------------------------------------------------------------------------------------------------|-----------|
|                                                                                                                                   | OR                                  | (95%CI)   | OR                                     | (95%CI)   | OR                                                                                                          | (95%CI)   |
| <b>Age (per 10 year increase)</b>                                                                                                 | 1.3                                 | (1.1-1.6) | 1.3                                    | (1.1-1.5) | 1.3                                                                                                         | (1.1-1.5) |
| <b>Educational status</b>                                                                                                         |                                     |           |                                        |           |                                                                                                             |           |
| Illiterate                                                                                                                        | 1.0                                 |           | -                                      |           | -                                                                                                           |           |
| Any literacy                                                                                                                      | 0.6                                 | (0.3-1.3) |                                        |           |                                                                                                             |           |
| <b>Household income/month</b>                                                                                                     |                                     |           |                                        |           |                                                                                                             |           |
| <3000-10000PKR                                                                                                                    | 1.0                                 |           | -                                      |           | -                                                                                                           |           |
| >10000PKR                                                                                                                         | 1.1                                 | (0.8-1.6) |                                        |           |                                                                                                             |           |
| <b>Household ownership</b>                                                                                                        |                                     |           |                                        |           |                                                                                                             |           |
| Rented                                                                                                                            | 1.0                                 |           | -                                      |           | -                                                                                                           |           |
| Own                                                                                                                               | 0.8                                 | (0.5-1.3) |                                        |           |                                                                                                             |           |
| <b>Construction of house</b>                                                                                                      |                                     |           |                                        |           |                                                                                                             |           |
| Katcha/semi-pucca                                                                                                                 | 1.0                                 |           | -                                      |           | -                                                                                                           |           |
| Pucca                                                                                                                             | 1.2                                 | (0.8-1.7) |                                        |           |                                                                                                             |           |
| <b>Number of household assets</b>                                                                                                 |                                     |           |                                        |           |                                                                                                             |           |
| 0-1                                                                                                                               | 1.0                                 |           | -                                      |           | -                                                                                                           |           |
| 2-3                                                                                                                               | 0.9                                 | (0.6-1.3) |                                        |           |                                                                                                             |           |
| ≥4                                                                                                                                | 1.0                                 | (0.6-1.5) |                                        |           |                                                                                                             |           |
| <b>Father's occupation in woman's<br/>childhood</b>                                                                               |                                     |           |                                        |           |                                                                                                             |           |
| Non-manual                                                                                                                        | 1.0                                 |           | -                                      |           | -                                                                                                           |           |
| Manual                                                                                                                            | 0.7                                 | (0.3-1.4) |                                        |           |                                                                                                             |           |
| <b>Birthweight</b>                                                                                                                |                                     |           |                                        |           |                                                                                                             |           |
| Lower than normal                                                                                                                 | 1.0                                 |           | -                                      |           | -                                                                                                           |           |
| Normal                                                                                                                            | 1.2                                 | (0.8-1.8) | -                                      |           | -                                                                                                           |           |
| Higher than normal                                                                                                                | 1.1                                 | (0.7-1.8) |                                        |           |                                                                                                             |           |
| <b>Ever hungry during all the time<br/>during childhood because there<br/>was not enough food</b>                                 |                                     |           |                                        |           |                                                                                                             |           |
| No                                                                                                                                | 1.0                                 |           | -                                      |           | -                                                                                                           |           |
| Yes                                                                                                                               | 0.8                                 | (0.6-1.1) |                                        |           |                                                                                                             |           |
| <b>Lost weight during childhood</b>                                                                                               |                                     |           |                                        |           |                                                                                                             |           |
| No                                                                                                                                | 1.0                                 |           | -                                      |           | -                                                                                                           |           |
| Yes                                                                                                                               | 1.0                                 | (0.8-1.4) |                                        |           |                                                                                                             |           |
| <b>Ever smoked regularly (any of<br/>cigarettes, bidi, huqqa)</b>                                                                 |                                     |           |                                        |           |                                                                                                             |           |
| Never                                                                                                                             | 1.0                                 |           | 1.0                                    |           | 1.0                                                                                                         |           |
| Ever                                                                                                                              | 2.1                                 | (1.3-3.3) | 2.0                                    | (1.2-3.2) | 2.1                                                                                                         | (1.3-3.6) |
| <b>Environmental tobacco smoke<br/>(at least one other household<br/>member smokes cigarettes, bidi<br/>or huqqa in the home)</b> |                                     |           |                                        |           |                                                                                                             |           |
| No                                                                                                                                | 1.0                                 |           | -                                      |           | -                                                                                                           |           |
| Yes                                                                                                                               | 1.2                                 | (0.9-1.6) |                                        |           |                                                                                                             |           |
| <b>Consumption of meat or eggs</b>                                                                                                |                                     |           |                                        |           |                                                                                                             |           |

|                                                         |     |           |     |           |     |           |
|---------------------------------------------------------|-----|-----------|-----|-----------|-----|-----------|
| Do not eat either meat or eggs as much as once per week | 1.0 |           | 1.0 |           | 1.0 |           |
| Eat one of meat or eggs as much as once per week        | 0.6 | (0.4-0.8) | 0.6 | (0.4-0.8) | 0.7 | (0.5-1.0) |
| Eat both meat and eggs at least once per week           | 0.4 | (0.3-0.7) | 0.5 | (0.3-0.7) | 0.5 | (0.3-0.8) |
| <b>Current nutrition<sup>c</sup></b>                    |     |           |     |           |     |           |
| Neither BMI nor WHR high                                | 1.0 |           |     |           |     |           |
| One of BMI or WHR high                                  | 0.8 | (0.5-1.1) | -   |           |     |           |
| Both BMI and WHR high                                   | 0.8 | (0.5-1.2) |     |           |     |           |
| <b>Non-user of biomass</b>                              | 1.0 |           |     |           |     |           |
| <b>User of biomass user</b>                             | 1.0 | (0.7-1.3) | 1.0 | (0.8-1.4) |     |           |
| <b>Long-term non-user of biomass</b>                    | 1.0 |           |     |           | 1.0 |           |
| <b>Long-term non-user of biomass</b>                    | 1.2 | (0.9-1.7) |     |           | 1.3 | (0.9-1.9) |

<sup>a</sup>Mutually adjusted risk estimates derived from a single regression model that included use of biomass and all of the variables that were significant ( $p < 0.1$ ) in analyses adjusted only for age

<sup>b</sup>Mutually adjusted risk estimates derived from a single regression model that included use of biomass and all of the variables that were significant ( $p < 0.1$ ) in analyses adjusted only for age, but was restricted to women who were long-term users or non-users of biomass

<sup>c</sup>Body mass index (BMI) ( $\text{kg}/\text{m}^2$ )  $\geq 25$  = high; Waist-to-hip ratio (WHR)  $\geq 0.85$  = high.

**Supplementary Table 6.** Associations of previous history of heart attack (diagnosed by a physician) with risk factors.

| Risk factor                                                                                                                       | Adjusted only<br>for age<br>(n=850) <sup>a</sup> |           | Fully adjusted <sup>b</sup><br>(n=850) |           | Fully adjusted and<br>limited to long-term<br>users and non-users of<br>biomass <sup>c</sup><br>(n=693) |           |
|-----------------------------------------------------------------------------------------------------------------------------------|--------------------------------------------------|-----------|----------------------------------------|-----------|---------------------------------------------------------------------------------------------------------|-----------|
|                                                                                                                                   | OR                                               | (95%CI)   | OR                                     | (95%CI)   | OR                                                                                                      | (95%CI)   |
| <b>Age (per 10 year increase)</b>                                                                                                 | 1.5                                              | (1.2-2.0) | 1.5                                    | (1.2-2.0) | 1.5                                                                                                     | (1.2-2.0) |
| <b>Educational status</b>                                                                                                         |                                                  |           |                                        |           |                                                                                                         |           |
| Illiterate                                                                                                                        | 1.0                                              |           | -                                      |           | -                                                                                                       |           |
| Any literacy                                                                                                                      | 1.5                                              | (0.5-4.5) |                                        |           |                                                                                                         |           |
| <b>Household income/month</b>                                                                                                     |                                                  |           |                                        |           |                                                                                                         |           |
| <3000-10000PKR                                                                                                                    | 1.0                                              |           | 1.0                                    |           | 1.0                                                                                                     |           |
| >10000PKR                                                                                                                         | 1.6                                              | (0.9-2.9) | 1.4                                    | (0.8-2.5) | 1.6                                                                                                     | (0.8-3.1) |
| <b>Household ownership</b>                                                                                                        |                                                  |           |                                        |           |                                                                                                         |           |
| Rented                                                                                                                            | 1.0                                              |           | -                                      |           | -                                                                                                       |           |
| Own                                                                                                                               | 1.2                                              | (0.4-3.4) |                                        |           |                                                                                                         |           |
| <b>Construction of house</b>                                                                                                      |                                                  |           |                                        |           |                                                                                                         |           |
| Katcha/semi-pucca                                                                                                                 |                                                  |           | -                                      |           | -                                                                                                       |           |
| Pucca                                                                                                                             | 1.3                                              | (0.7-2.3) |                                        |           |                                                                                                         |           |
| <b>Number of household assets</b>                                                                                                 |                                                  |           |                                        |           |                                                                                                         |           |
| 0-1                                                                                                                               | 1.0                                              |           | 1.0                                    |           | 1.0                                                                                                     |           |
| 2-3                                                                                                                               | 1.4                                              | (0.7-2.7) | 1.3                                    | (0.7-2.5) | 1.8                                                                                                     | (0.8-3.8) |
| ≥4                                                                                                                                | 2.1                                              | (1.0-4.3) | 1.8                                    | (0.8-3.8) | 2.1                                                                                                     | (0.9-5.1) |
| <b>Father's occupation in woman's<br/>childhood</b>                                                                               |                                                  |           |                                        |           |                                                                                                         |           |
| Non-manual                                                                                                                        | 1.0                                              |           | -                                      |           | -                                                                                                       |           |
| Manual                                                                                                                            | 1.0                                              | (0.2-4.5) |                                        |           |                                                                                                         |           |
| <b>Birthweight</b>                                                                                                                |                                                  |           |                                        |           |                                                                                                         |           |
| Lower than normal                                                                                                                 | 1.0                                              |           |                                        |           | -                                                                                                       |           |
| Normal                                                                                                                            | 1.0                                              | (0.5-1.9) | -                                      |           |                                                                                                         |           |
| Higher than normal                                                                                                                | 0.7                                              | (0.3-1.7) |                                        |           |                                                                                                         |           |
| <b>Ever hungry during all the time<br/>during childhood because there<br/>was not enough food</b>                                 |                                                  |           |                                        |           |                                                                                                         |           |
| No                                                                                                                                | 1.0                                              |           | -                                      |           | -                                                                                                       |           |
| Yes                                                                                                                               | 1.0                                              | (0.6-1.7) |                                        |           |                                                                                                         |           |
| <b>Lost weight during childhood</b>                                                                                               |                                                  |           |                                        |           |                                                                                                         |           |
| No                                                                                                                                | 1.0                                              |           | -                                      |           | -                                                                                                       |           |
| Yes                                                                                                                               | 1.1                                              | (0.6-1.9) |                                        |           |                                                                                                         |           |
| <b>Ever smoked regularly (any of<br/>cigarettes, bidi, huqqa)</b>                                                                 |                                                  |           |                                        |           |                                                                                                         |           |
| Never                                                                                                                             | 1.0                                              |           | -                                      |           | -                                                                                                       |           |
| Ever                                                                                                                              | 0.9                                              | (0.4-2.1) |                                        |           |                                                                                                         |           |
| <b>Environmental tobacco smoke (at<br/>least one other household member<br/>smokes cigarettes, bidi or huqqa in<br/>the home)</b> |                                                  |           |                                        |           |                                                                                                         |           |
| No                                                                                                                                | 1.0                                              |           | -                                      |           | -                                                                                                       |           |
| Yes                                                                                                                               | 0.9                                              | (0.5-1.6) |                                        |           |                                                                                                         |           |
| <b>Consumption of meat or eggs</b>                                                                                                |                                                  |           |                                        |           |                                                                                                         |           |

|                                                         |     |           |     |           |               |
|---------------------------------------------------------|-----|-----------|-----|-----------|---------------|
| Do not eat either meat or eggs as much as once per week | 1.0 |           | -   |           |               |
| Eat one of meat or eggs as much as once per week        | 1.2 | (0.6-2.3) |     |           |               |
| Eat both meat and eggs at least once per week           | 1.8 | (0.9-3.5) |     |           |               |
| <b>Current nutrition<sup>d</sup></b>                    |     |           |     |           |               |
| Neither BMI nor WHR high                                | 1.0 |           | 1.0 | 1.0       |               |
| One of BMI or WHR high                                  | 1.3 | (0.6-2.5) | 1.2 | (0.6-2.5) | 1.6 (0.7-3.4) |
| Both BMI and WHR high                                   | 2.0 | (1.0-4.0) | 1.9 | (0.9-3.7) | 1.7 (0.8-3.6) |
| <b>Non-user of biomass</b>                              | 1.0 |           | 1.0 | -         |               |
| <b>Use of biomass</b>                                   | 1.4 | (0.8-2.4) | 1.2 | (0.7-2.2) |               |
| <b>Long-term non-user of biomass</b>                    | 1.0 |           |     | 1.0       |               |
| <b>Long-term user of biomass</b>                        | 1.5 | (0.8-2.7) |     | 1.3       | (0.7-2.4)     |

<sup>a</sup>Mutually adjusted risk estimates derived from a single regression model that included use of biomass and all of the variables that were significant ( $p < 0.1$ ) in analyses adjusted only for age

<sup>b</sup>Mutually adjusted risk estimates derived from a single regression model that included use of biomass and all of the variables that were significant ( $p < 0.1$ ) in analyses adjusted only for age, but was restricted to women who were long-term users or non-users of biomass

<sup>c</sup>Body mass index (BMI) ( $\text{kg}/\text{m}^2$ )  $\geq 25$  = high; Waist-to-hip ratio (WHR)  $\geq 0.85$  = high.

**Supplementary Table 7.** Associations of definite or probable CHD on ECG with risk factors.

| Risk factor                                                                                                           | Adjusted only for age<br>(n=841) |           | Fully adjusted <sup>a</sup><br>(n=841) |           | Fully adjusted and limited to long-term users and non-users of biomass <sup>b</sup><br>(n=686) |           |
|-----------------------------------------------------------------------------------------------------------------------|----------------------------------|-----------|----------------------------------------|-----------|------------------------------------------------------------------------------------------------|-----------|
|                                                                                                                       | OR                               | (95%CI)   | OR                                     | (95%CI)   | OR                                                                                             | (95%CI)   |
| <b>Age (per 10 year increase)</b>                                                                                     | 1.1                              | (0.9-1.3) | 1.1                                    | (0.9-1.3) | 1.0                                                                                            | (0.8-1.3) |
| <b>Educational status</b>                                                                                             |                                  |           |                                        |           |                                                                                                |           |
| Illiterate                                                                                                            | 1.0                              |           | -                                      |           | -                                                                                              |           |
| Any literacy                                                                                                          | 0.8                              | (0.4-1.7) |                                        |           |                                                                                                |           |
| <b>Household income/month</b>                                                                                         |                                  |           |                                        |           |                                                                                                |           |
| <3000-10000PKR                                                                                                        | 1.0                              |           | 1.0                                    |           | 1.0                                                                                            |           |
| >10000PKR                                                                                                             | 1.6                              | (1.1-2.3) | 1.6                                    | (1.1-2.4) | 1.3                                                                                            | (0.8-2.0) |
| <b>Household ownership</b>                                                                                            |                                  |           |                                        |           |                                                                                                |           |
| Rented                                                                                                                | 1.0                              |           | -                                      |           | -                                                                                              |           |
| Own                                                                                                                   | 1.4                              | (0.7-2.9) |                                        |           |                                                                                                |           |
| <b>Construction of house</b>                                                                                          |                                  |           |                                        |           |                                                                                                |           |
| Katcha/semi-pucca                                                                                                     | 1.0                              |           | -                                      |           | -                                                                                              |           |
| Pucca                                                                                                                 | 1.0                              | (0.7-1.5) |                                        |           |                                                                                                |           |
| <b>Number of household assets</b>                                                                                     |                                  |           |                                        |           |                                                                                                |           |
| 0-1                                                                                                                   | 1.0                              |           | -                                      |           | -                                                                                              |           |
| 2-3                                                                                                                   | 1.0                              | (0.7-1.5) |                                        |           |                                                                                                |           |
| ≥4                                                                                                                    | 1.3                              | (0.8-2.1) |                                        |           |                                                                                                |           |
| <b>Father's occupation in woman's childhood</b>                                                                       |                                  |           |                                        |           |                                                                                                |           |
| Non-manual                                                                                                            | 1.0                              |           | -                                      |           | -                                                                                              |           |
| Manual                                                                                                                | 1.0                              | (0.4-2.3) |                                        |           |                                                                                                |           |
| <b>Birthweight</b>                                                                                                    |                                  |           |                                        |           |                                                                                                |           |
| Lower than normal                                                                                                     | 1.0                              |           | -                                      |           | -                                                                                              |           |
| Normal                                                                                                                | 1.1                              | (0.7-1.7) | -                                      |           | -                                                                                              |           |
| Higher than normal                                                                                                    | 1.1                              | (0.7-1.9) |                                        |           |                                                                                                |           |
| <b>Ever hungry during all the time during childhood because there was not enough food</b>                             |                                  |           |                                        |           |                                                                                                |           |
| No                                                                                                                    | 1.0                              |           | -                                      |           | -                                                                                              |           |
| Yes                                                                                                                   | 1.1                              | (0.8-1.6) |                                        |           |                                                                                                |           |
| <b>Lost weight during childhood</b>                                                                                   |                                  |           |                                        |           |                                                                                                |           |
| No                                                                                                                    | 1.0                              |           | -                                      |           | -                                                                                              |           |
| Yes                                                                                                                   | 0.8                              | (0.6-1.2) |                                        |           |                                                                                                |           |
| <b>Ever smoked regularly (any of cigarettes, bidi, huqqa)</b>                                                         |                                  |           |                                        |           |                                                                                                |           |
| Never                                                                                                                 | 1.0                              |           | -                                      |           | -                                                                                              |           |
| Ever                                                                                                                  | 1.0                              | (0.6-1.8) |                                        |           |                                                                                                |           |
| <b>Environmental tobacco smoke (at least one other household member smokes cigarettes, bidi or huqqa in the home)</b> |                                  |           |                                        |           |                                                                                                |           |
| No                                                                                                                    | 1.0                              |           | -                                      |           | -                                                                                              |           |
| Yes                                                                                                                   | 0.9                              | (0.6-1.3) | -                                      |           | -                                                                                              |           |
| <b>Consumption of meat or eggs</b>                                                                                    |                                  |           |                                        |           |                                                                                                |           |

|                                                         |     |           |  |
|---------------------------------------------------------|-----|-----------|--|
| Do not eat either meat or eggs as much as once per week | 1.0 |           |  |
| Eat one of meat or eggs as much as once per week        | 0.9 | (0.6-1.4) |  |
| Eat both meat and eggs at least once per week           | 1.2 | (0.7-1.8) |  |

---

**Current nutrition<sup>c</sup>**

|                          |     |           |   |
|--------------------------|-----|-----------|---|
| Neither BMI nor WHR high | 1.0 |           |   |
| One of BMI or WHR high   | 0.8 | (0.5-1.2) | - |
| Both BMI and WHR high    | 1.1 | (0.7-1.6) |   |

---

**Non-user of biomass user** 1.0 1.0

**User of biomass** 0.8 (0.6-1.2) 0.8 (0.6-1.2)

---

**Longterm non-user of biomass** 1.0 1.0

**Longterm user of biomass** 0.9 (0.6-1.3) 0.9 (0.6-1.3)

---

<sup>a</sup>ECGs were missing for 9 women or not codable due to poor quality.

<sup>b</sup>Mutually adjusted risk estimates derived from a single regression model that included use of biomass and all of the variables that were significant ( $p < 0.1$ ) in analyses adjusted only for age

<sup>c</sup>Mutually adjusted risk estimates derived from a single regression model that included use of biomass and all of the variables that were significant ( $p < 0.1$ ) in analyses adjusted only for age, but was restricted to women who were long-term users or non-users of biomass

<sup>d</sup>Body mass index (BMI) ( $\text{kg}/\text{m}^2$ )  $\geq 25$  = high; Waist-to-hip ratio (WHR)  $\geq 0.85$  = high.

**STROBE 2007 (v4) Statement—Checklist of items that should be included in reports of *cross-sectional studies***

| Section/Topic                | Item # | Recommendation                                                                                                                                                                       | Reported on page # |
|------------------------------|--------|--------------------------------------------------------------------------------------------------------------------------------------------------------------------------------------|--------------------|
| <b>Title and abstract</b>    | 1      | (a) Indicate the study's design with a commonly used term in the title or the abstract                                                                                               | 1                  |
|                              |        | (b) Provide in the abstract an informative and balanced summary of what was done and what was found                                                                                  | 1-2                |
| <b>Introduction</b>          |        |                                                                                                                                                                                      |                    |
| Background/rationale         | 2      | Explain the scientific background and rationale for the investigation being reported                                                                                                 | 3                  |
| Objectives                   | 3      | State specific objectives, including any prespecified hypotheses                                                                                                                     | 3                  |
| <b>Methods</b>               |        |                                                                                                                                                                                      |                    |
| Study design                 | 4      | Present key elements of study design early in the paper                                                                                                                              | 3                  |
| Setting                      | 5      | Describe the setting, locations, and relevant dates, including periods of recruitment, exposure, follow-up, and data collection                                                      | 3                  |
| Participants                 | 6      | (a) Give the eligibility criteria, and the sources and methods of selection of participants                                                                                          | 3                  |
| Variables                    | 7      | Clearly define all outcomes, exposures, predictors, potential confounders, and effect modifiers. Give diagnostic criteria, if applicable                                             | 3-5                |
| Data sources/<br>measurement | 8*     | For each variable of interest, give sources of data and details of methods of assessment (measurement). Describe comparability of assessment methods if there is more than one group | 3-5                |
| Bias                         | 9      | Describe any efforts to address potential sources of bias                                                                                                                            | 3-5                |
| Study size                   | 10     | Explain how the study size was arrived at                                                                                                                                            | 5                  |
| Quantitative variables       | 11     | Explain how quantitative variables were handled in the analyses. If applicable, describe which groupings were chosen and why                                                         | 5                  |
| Statistical methods          | 12     | (a) Describe all statistical methods, including those used to control for confounding                                                                                                | 5                  |
|                              |        | (b) Describe any methods used to examine subgroups and interactions                                                                                                                  | 5                  |
|                              |        | (c) Explain how missing data were addressed                                                                                                                                          | In relevant tables |
|                              |        | (d) If applicable, describe analytical methods taking account of sampling strategy                                                                                                   | N/A                |
|                              |        | (e) Describe any sensitivity analyses                                                                                                                                                | N/A                |
| <b>Results</b>               |        |                                                                                                                                                                                      |                    |



|                          |     |                                                                                                                                                                                                              |                          |
|--------------------------|-----|--------------------------------------------------------------------------------------------------------------------------------------------------------------------------------------------------------------|--------------------------|
| Participants             | 13* | (a) Report numbers of individuals at each stage of study—eg numbers potentially eligible, examined for eligibility, confirmed eligible, included in the study, completing follow-up, and analysed            | 6                        |
|                          |     | (b) Give reasons for non-participation at each stage                                                                                                                                                         | 6                        |
|                          |     | (c) Consider use of a flow diagram                                                                                                                                                                           | Not needed               |
| Descriptive data         | 14* | (a) Give characteristics of study participants (eg demographic, clinical, social) and information on exposures and potential confounders                                                                     | 6 and Tables 1-3         |
|                          |     | (b) Indicate number of participants with missing data for each variable of interest                                                                                                                          | Tables 1-3               |
| Outcome data             | 15* | Report numbers of outcome events or summary measures                                                                                                                                                         | 6                        |
| Main results             | 16  | (a) Give unadjusted estimates and, if applicable, confounder-adjusted estimates and their precision (eg, 95% confidence interval). Make clear which confounders were adjusted for and why they were included | Supplementary Tables 4-7 |
|                          |     | (b) Report category boundaries when continuous variables were categorized                                                                                                                                    | Tables                   |
|                          |     | (c) If relevant, consider translating estimates of relative risk into absolute risk for a meaningful time period                                                                                             | N/A                      |
| Other analyses           | 17  | Report other analyses done—eg analyses of subgroups and interactions, and sensitivity analyses                                                                                                               | N/A                      |
| <b>Discussion</b>        |     |                                                                                                                                                                                                              |                          |
| Key results              | 18  | Summarise key results with reference to study objectives                                                                                                                                                     | 8                        |
| Limitations              | 19  | Discuss limitations of the study, taking into account sources of potential bias or imprecision. Discuss both direction and magnitude of any potential bias                                                   | 8-9                      |
| Interpretation           | 20  | Give a cautious overall interpretation of results considering objectives, limitations, multiplicity of analyses, results from similar studies, and other relevant evidence                                   | 10                       |
| Generalisability         | 21  | Discuss the generalisability (external validity) of the study results                                                                                                                                        | 8                        |
| <b>Other information</b> |     |                                                                                                                                                                                                              |                          |
| Funding                  | 22  | Give the source of funding and the role of the funders for the present study and, if applicable, for the original study on which the present article is based                                                | 2                        |

\*Give information separately for cases and controls in case-control studies and, if applicable, for exposed and unexposed groups in cohort and cross-sectional studies.

**Note:** An Explanation and Elaboration article discusses each checklist item and gives methodological background and published examples of transparent reporting. The STROBE checklist is best used in conjunction with this article (freely available on the Web sites of PLoS Medicine at <http://www.plosmedicine.org/>, Annals of Internal Medicine at <http://www.annals.org/>, and Epidemiology at <http://www.epidem.com/>). Information on the STROBE Initiative is available at [www.strobe-statement.org](http://www.strobe-statement.org).
