# Supplementary material for: Coronary heart disease, hypertension and use of biomass fuel among women: comparative cross-sectional study
Source: PubMed Central journal article supplement — BMJ Open. 2019 Aug 8;9(8):e030881. doi: 10.1136/bmjopen-2019-030881 (PMC6701594; doi:10.1136/bmjopen-2019-030881), 2019-08-08
Supplement: bmjopen-2019-030881supp001.pdf [file bmjopen-2019-030881supp001.pdf]

## Supplementary Materials

**Supplementary Table 1.** Prevalence of hypertension, history of heart attack, angina and coronary heart disease in study sample.

| <b>Characteristic</b>                                | <b>n</b> | <b>(%)</b> |
|------------------------------------------------------|----------|------------|
| <b>Hypertension</b>                                  |          |            |
| Systolic hypertension (systolic BP $\geq$ 140 mmHg)  | 133      | (15.8)     |
| Diastolic hypertension (diastolic BP $\geq$ 90 mmHg) | 102      | (12.1)     |
| Regular medication for high blood pressure           | 198      | (23.5)     |
| Hypertension (any of the above)                      | 297      | (35.3)     |
| <b>Angina</b>                                        | 227      | (27.0)     |
| <b>History of heart attack</b>                       | 54       | (6.4)      |
| <b>Definite or probable CHD on ECG<sup>a</sup></b>   | 159      | (18.9)     |

<sup>a</sup>Based on 841 women. ECGs for 9 women were missing or could not be coded due to poor quality.

**Supplementary Table 2.** Classification of ECGs for definite or probable CHD by two observers.

| <b>Observer 1</b> | <b>Observer 2</b> |                 |
|-------------------|-------------------|-----------------|
|                   | <b>Negative</b>   | <b>Positive</b> |
| <b>Negative</b>   | 591               | 30              |
| <b>Positive</b>   | 94                | 122             |

**Kappa = 0.57**

**Supplementary Table 3.** Prevalence of definite or probable CHD changes on ECG according to history of heart attack and angina.

| Other measure of CHD                 | Definite or probable CHD changes on ECG <sup>a</sup> |        |     |        |
|--------------------------------------|------------------------------------------------------|--------|-----|--------|
|                                      | Yes                                                  |        | No  |        |
|                                      | n                                                    | (%)    | N   | (%)    |
| No history of heart attack or angina | 105                                                  | (18.2) | 471 | (81.8) |
| History of angina                    | 45                                                   | (19.8) | 182 | (80.2) |
| History of heart attack              | 14                                                   | (25.9) | 40  | (74.1) |
| History of angina or heart attack    | 54                                                   | (20.4) | 211 | (79.6) |
| History of angina and heart attack   | 5                                                    | (31.3) | 11  | (68.8) |

<sup>a</sup>ECGs for 9 women were missing or could not be coded due to poor quality.

**Supplementary Table 4.** Association of hypertension with risk factors.

| Risk factor                                                                                                                       | Adjusted only<br>for age<br>(n=850) |           | Fully adjusted <sup>a</sup><br>(n=850) |           | Fully adjusted and<br>limited to long-<br>term users and<br>non-users of<br>biomass <sup>b</sup><br>(n=693) |           |
|-----------------------------------------------------------------------------------------------------------------------------------|-------------------------------------|-----------|----------------------------------------|-----------|-------------------------------------------------------------------------------------------------------------|-----------|
|                                                                                                                                   | OR                                  | (95% CI)  | OR                                     | (95% CI)  | OR                                                                                                          | (95% CI)  |
| <b>Age (per 10 year increase)</b>                                                                                                 | 1.4                                 | (1.2-1.6) | 1.4                                    | (1.2-1.7) | 1.5                                                                                                         | (1.2-1.7) |
| <b>Educational status</b>                                                                                                         |                                     |           |                                        |           |                                                                                                             |           |
| Illiterate                                                                                                                        | 1.0                                 |           | -                                      |           | -                                                                                                           |           |
| Any literacy                                                                                                                      | 0.6                                 | (0.3-1.2) |                                        |           |                                                                                                             |           |
| <b>Household income/month</b>                                                                                                     |                                     |           |                                        |           |                                                                                                             |           |
| <3000-10000PKR                                                                                                                    | 1.0                                 |           | -                                      |           | -                                                                                                           |           |
| >10000PKR                                                                                                                         | 1.0                                 | (0.7-1.4) |                                        |           |                                                                                                             |           |
| <b>Household ownership</b>                                                                                                        |                                     |           |                                        |           |                                                                                                             |           |
| Rented                                                                                                                            | 1.0                                 |           | -                                      |           | -                                                                                                           |           |
| Own                                                                                                                               | 0.8                                 | (0.5-1.3) |                                        |           |                                                                                                             |           |
| <b>Construction of house</b>                                                                                                      |                                     |           |                                        |           |                                                                                                             |           |
| Katcha/semi-pucca                                                                                                                 | 1.0                                 |           | -                                      |           | -                                                                                                           |           |
| Pucca                                                                                                                             | 0.9                                 | (0.6-1.2) |                                        |           |                                                                                                             |           |
| <b>Number of household assets</b>                                                                                                 |                                     |           |                                        |           |                                                                                                             |           |
| 0-1                                                                                                                               | 1.0                                 |           | 1.0                                    |           | 1.0                                                                                                         |           |
| 2-3                                                                                                                               | 1.7                                 | (1.2-2.4) | 1.6                                    | (1.2-2.3) | 1.8                                                                                                         | (1.2-2.6) |
| ≥4                                                                                                                                | 2.4                                 | (1.6-3.6) | 2.3                                    | (1.5-3.4) | 2.7                                                                                                         | (1.7-4.3) |
| <b>Father's occupation in woman's<br/>childhood</b>                                                                               |                                     |           |                                        |           |                                                                                                             |           |
| Non-manual                                                                                                                        | 1.0                                 |           | -                                      |           | -                                                                                                           |           |
| Manual                                                                                                                            | 1.2                                 | (0.6-2.5) |                                        |           |                                                                                                             |           |
| <b>Birthweight</b>                                                                                                                |                                     |           |                                        |           |                                                                                                             |           |
| Lower than normal                                                                                                                 | 1.0                                 |           |                                        |           | -                                                                                                           |           |
| Normal                                                                                                                            | 1.0                                 | (0.7-1.4) | -                                      |           |                                                                                                             |           |
| Higher than normal                                                                                                                | 1.0                                 | (0.6-1.5) |                                        |           |                                                                                                             |           |
| <b>Ever hungry during all the time<br/>during childhood because there<br/>was not enough food</b>                                 |                                     |           |                                        |           |                                                                                                             |           |
| No                                                                                                                                | 1.0                                 |           | -                                      |           | -                                                                                                           |           |
| Yes                                                                                                                               | 0.9                                 | (0.7-1.3) |                                        |           |                                                                                                             |           |
| <b>Lost weight during childhood</b>                                                                                               |                                     |           |                                        |           |                                                                                                             |           |
| No                                                                                                                                | 1.0                                 |           | -                                      |           | -                                                                                                           |           |
| Yes                                                                                                                               | 1.2                                 | (0.9-1.6) |                                        |           |                                                                                                             |           |
| <b>Ever smoked regularly (any of<br/>cigarettes, bidi, huqqa)</b>                                                                 |                                     |           |                                        |           |                                                                                                             |           |
| Never                                                                                                                             | 1.0                                 |           | -                                      |           | -                                                                                                           |           |
| Ever                                                                                                                              | 0.8                                 | (0.5-1.3) |                                        |           |                                                                                                             |           |
| <b>Environmental tobacco smoke (at<br/>least one other household member<br/>smokes cigarettes, bidi or huqqa<br/>in the home)</b> |                                     |           |                                        |           |                                                                                                             |           |
| No                                                                                                                                | 1.0                                 |           | -                                      |           | -                                                                                                           |           |
| Yes                                                                                                                               | 0.8                                 | (0.6-1.1) |                                        |           |                                                                                                             |           |
| <b>Consumption of meat or eggs</b>                                                                                                |                                     |           |                                        |           |                                                                                                             |           |

|                                                         |     |           |     |           |     |           |
|---------------------------------------------------------|-----|-----------|-----|-----------|-----|-----------|
| Do not eat either meat or eggs as much as once per week | 1.0 |           | 1.0 |           | 1.0 |           |
| Eat one of meat or eggs as much as once per week        | 1.4 | (1.0-1.9) | 1.2 | (0.9-1.7) | 1.2 | (0.8-1.7) |
| Eat both meat and eggs at least once per week           | 1.4 | (1.0-2.1) | 1.2 | (0.8-1.8) | 1.2 | (0.8-1.9) |
| <b>Current nutrition<sup>c</sup></b>                    |     |           |     |           |     |           |
| Neither BMI nor WHR high                                | 1.0 |           | 1.0 |           | 1.0 |           |
| One of BMI or WHR high                                  | 1.2 | (0.9-1.7) | 1.2 | (0.8-1.6) | 1.2 | (0.8-1.8) |
| Both BMI and WHR high                                   | 2.0 | (1.4-2.9) | 1.9 | (1.3-2.8) | 1.8 | (1.2-2.7) |
| <b>Non-user of biomass</b>                              | 1.0 |           | 1.0 |           |     |           |
| <b>User of biomass</b>                                  | 1.2 | (0.9-1.5) | 1.0 | (0.8-1.4) |     |           |
| <b>Long-term non-user of biomass</b>                    | 1.0 |           |     |           | 1.0 |           |
| <b>Long-term user of biomass</b>                        | 1.2 | (0.9-1.7) |     |           | 1.1 | (0.8-1.6) |

<sup>a</sup>Mutually adjusted risk estimates derived from a single regression model that included use of biomass and all of the variables that were significant ( $p < 0.1$ ) in analyses adjusted only for age

<sup>b</sup>Mutually adjusted risk estimates derived from a single regression model that included use of biomass and all of the variables that were significant ( $p < 0.1$ ) in analyses adjusted only for age, but was restricted to women who were long-term users or non-users of biomass

<sup>c</sup>Body mass index (BMI) ( $\text{kg}/\text{m}^2$ )  $\geq 25 = \text{high}$ ; *Waist-to-hip ratio (WHR)*  $\geq 0.85 = \text{high}$ .

**Supplementary Table 5.** Associations of angina with risk factors.

| Risk factor                                                                                                                       | Adjusted only<br>for age<br>(n=850) |           | Fully adjusted <sup>a</sup><br>(n=850) |           | Fully adjusted and<br>limited to long-<br>term users and<br>non-users of<br>biomass <sup>b</sup><br>(n=693) |           |
|-----------------------------------------------------------------------------------------------------------------------------------|-------------------------------------|-----------|----------------------------------------|-----------|-------------------------------------------------------------------------------------------------------------|-----------|
|                                                                                                                                   | OR                                  | (95% CI)  | OR                                     | (95% CI)  | OR                                                                                                          | (95% CI)  |
| <b>Age (per 10 year increase)</b>                                                                                                 | 1.3                                 | (1.1-1.6) | 1.3                                    | (1.1-1.5) | 1.3                                                                                                         | (1.1-1.5) |
| <b>Educational status</b>                                                                                                         |                                     |           |                                        |           |                                                                                                             |           |
| Illiterate                                                                                                                        | 1.0                                 |           | -                                      |           | -                                                                                                           |           |
| Any literacy                                                                                                                      | 0.6                                 | (0.3-1.3) |                                        |           |                                                                                                             |           |
| <b>Household income/month</b>                                                                                                     |                                     |           |                                        |           |                                                                                                             |           |
| <3000-10000PKR                                                                                                                    | 1.0                                 |           | -                                      |           | -                                                                                                           |           |
| >10000PKR                                                                                                                         | 1.1                                 | (0.8-1.6) |                                        |           |                                                                                                             |           |
| <b>Household ownership</b>                                                                                                        |                                     |           |                                        |           |                                                                                                             |           |
| Rented                                                                                                                            | 1.0                                 |           | -                                      |           | -                                                                                                           |           |
| Own                                                                                                                               | 0.8                                 | (0.5-1.3) |                                        |           |                                                                                                             |           |
| <b>Construction of house</b>                                                                                                      |                                     |           |                                        |           |                                                                                                             |           |
| Katcha/semi-pucca                                                                                                                 | 1.0                                 |           | -                                      |           | -                                                                                                           |           |
| Pucca                                                                                                                             | 1.2                                 | (0.8-1.7) |                                        |           |                                                                                                             |           |
| <b>Number of household assets</b>                                                                                                 |                                     |           |                                        |           |                                                                                                             |           |
| 0-1                                                                                                                               | 1.0                                 |           | -                                      |           | -                                                                                                           |           |
| 2-3                                                                                                                               | 0.9                                 | (0.6-1.3) |                                        |           |                                                                                                             |           |
| ≥4                                                                                                                                | 1.0                                 | (0.6-1.5) |                                        |           |                                                                                                             |           |
| <b>Father's occupation in woman's<br/>childhood</b>                                                                               |                                     |           |                                        |           |                                                                                                             |           |
| Non-manual                                                                                                                        | 1.0                                 |           | -                                      |           | -                                                                                                           |           |
| Manual                                                                                                                            | 0.7                                 | (0.3-1.4) |                                        |           |                                                                                                             |           |
| <b>Birthweight</b>                                                                                                                |                                     |           |                                        |           |                                                                                                             |           |
| Lower than normal                                                                                                                 | 1.0                                 |           |                                        |           | -                                                                                                           |           |
| Normal                                                                                                                            | 1.2                                 | (0.8-1.8) | -                                      |           |                                                                                                             |           |
| Higher than normal                                                                                                                | 1.1                                 | (0.7-1.8) |                                        |           |                                                                                                             |           |
| <b>Ever hungry during all the time<br/>during childhood because there<br/>was not enough food</b>                                 |                                     |           |                                        |           |                                                                                                             |           |
| No                                                                                                                                | 1.0                                 |           | -                                      |           | -                                                                                                           |           |
| Yes                                                                                                                               | 0.8                                 | (0.6-1.1) |                                        |           |                                                                                                             |           |
| <b>Lost weight during childhood</b>                                                                                               |                                     |           |                                        |           |                                                                                                             |           |
| No                                                                                                                                | 1.0                                 |           | -                                      |           | -                                                                                                           |           |
| Yes                                                                                                                               | 1.0                                 | (0.8-1.4) |                                        |           |                                                                                                             |           |
| <b>Ever smoked regularly (any of<br/>cigarettes, bidi, huqqa)</b>                                                                 |                                     |           |                                        |           |                                                                                                             |           |
| Never                                                                                                                             | 1.0                                 |           | 1.0                                    |           | 1.0                                                                                                         |           |
| Ever                                                                                                                              | 2.1                                 | (1.3-3.3) | 2.0                                    | (1.2-3.2) | 2.1                                                                                                         | (1.3-3.6) |
| <b>Environmental tobacco smoke<br/>(at least one other household<br/>member smokes cigarettes, bidi<br/>or huqqa in the home)</b> |                                     |           |                                        |           |                                                                                                             |           |
| No                                                                                                                                | 1.0                                 |           | -                                      |           | -                                                                                                           |           |
| Yes                                                                                                                               | 1.2                                 | (0.9-1.6) |                                        |           |                                                                                                             |           |
| <b>Consumption of meat or eggs</b>                                                                                                |                                     |           |                                        |           |                                                                                                             |           |

|                                                         |     |           |     |           |     |           |
|---------------------------------------------------------|-----|-----------|-----|-----------|-----|-----------|
| Do not eat either meat or eggs as much as once per week | 1.0 |           | 1.0 |           | 1.0 |           |
| Eat one of meat or eggs as much as once per week        | 0.6 | (0.4-0.8) | 0.6 | (0.4-0.8) | 0.7 | (0.5-1.0) |
| Eat both meat and eggs at least once per week           | 0.4 | (0.3-0.7) | 0.5 | (0.3-0.7) | 0.5 | (0.3-0.8) |
| <b>Current nutrition<sup>c</sup></b>                    |     |           |     |           |     |           |
| Neither BMI nor WHR high                                | 1.0 |           |     |           |     |           |
| One of BMI or WHR high                                  | 0.8 | (0.5-1.1) | -   |           |     |           |
| Both BMI and WHR high                                   | 0.8 | (0.5-1.2) |     |           |     |           |
| <b>Non-user of biomass</b>                              | 1.0 |           |     |           |     |           |
| <b>User of biomass user</b>                             | 1.0 | (0.7-1.3) | 1.0 | (0.8-1.4) |     |           |
| <b>Long-term non-user of biomass</b>                    | 1.0 |           |     |           | 1.0 |           |
| <b>Long-term non-user of biomass</b>                    | 1.2 | (0.9-1.7) |     |           | 1.3 | (0.9-1.9) |

<sup>a</sup>Mutually adjusted risk estimates derived from a single regression model that included use of biomass and all of the variables that were significant ( $p < 0.1$ ) in analyses adjusted only for age

<sup>b</sup>Mutually adjusted risk estimates derived from a single regression model that included use of biomass and all of the variables that were significant ( $p < 0.1$ ) in analyses adjusted only for age, but was restricted to women who were long-term users or non-users of biomass

<sup>c</sup>Body mass index (BMI) ( $\text{kg}/\text{m}^2$ )  $\geq 25 = \text{high}$ ; Waist-to-hip ratio (WHR)  $\geq 0.85 = \text{high}$ .

**Supplementary Table 6.** Associations of previous history of heart attack (diagnosed by a physician) with risk factors.

| Risk factor                                                                                                                       | Adjusted only<br>for age<br>(n=850) <sup>a</sup> |           | Fully adjusted <sup>b</sup><br>(n=850) |           | Fully adjusted and<br>limited to long-term<br>users and non-users of<br>biomass <sup>c</sup><br>(n=693) |           |
|-----------------------------------------------------------------------------------------------------------------------------------|--------------------------------------------------|-----------|----------------------------------------|-----------|---------------------------------------------------------------------------------------------------------|-----------|
|                                                                                                                                   | OR                                               | (95% CI)  | OR                                     | (95% CI)  | OR                                                                                                      | (95% CI)  |
| <b>Age (per 10 year increase)</b>                                                                                                 | 1.5                                              | (1.2-2.0) | 1.5                                    | (1.2-2.0) | 1.5                                                                                                     | (1.2-2.0) |
| <b>Educational status</b>                                                                                                         |                                                  |           |                                        |           |                                                                                                         |           |
| Illiterate                                                                                                                        | 1.0                                              |           | -                                      |           | -                                                                                                       |           |
| Any literacy                                                                                                                      | 1.5                                              | (0.5-4.5) |                                        |           |                                                                                                         |           |
| <b>Household income/month</b>                                                                                                     |                                                  |           |                                        |           |                                                                                                         |           |
| <3000-10000PKR                                                                                                                    | 1.0                                              |           | 1.0                                    |           | 1.0                                                                                                     |           |
| >10000PKR                                                                                                                         | 1.6                                              | (0.9-2.9) | 1.4                                    | (0.8-2.5) | 1.6                                                                                                     | (0.8-3.1) |
| <b>Household ownership</b>                                                                                                        |                                                  |           |                                        |           |                                                                                                         |           |
| Rented                                                                                                                            | 1.0                                              |           | -                                      |           | -                                                                                                       |           |
| Own                                                                                                                               | 1.2                                              | (0.4-3.4) |                                        |           |                                                                                                         |           |
| <b>Construction of house</b>                                                                                                      |                                                  |           |                                        |           |                                                                                                         |           |
| Katcha/semi-pucca                                                                                                                 |                                                  |           | -                                      |           | -                                                                                                       |           |
| Pucca                                                                                                                             | 1.3                                              | (0.7-2.3) |                                        |           |                                                                                                         |           |
| <b>Number of household assets</b>                                                                                                 |                                                  |           |                                        |           |                                                                                                         |           |
| 0-1                                                                                                                               | 1.0                                              |           | 1.0                                    |           | 1.0                                                                                                     |           |
| 2-3                                                                                                                               | 1.4                                              | (0.7-2.7) | 1.3                                    | (0.7-2.5) | 1.8                                                                                                     | (0.8-3.8) |
| ≥4                                                                                                                                | 2.1                                              | (1.0-4.3) | 1.8                                    | (0.8-3.8) | 2.1                                                                                                     | (0.9-5.1) |
| <b>Father's occupation in woman's<br/>childhood</b>                                                                               |                                                  |           |                                        |           |                                                                                                         |           |
| Non-manual                                                                                                                        | 1.0                                              |           | -                                      |           | -                                                                                                       |           |
| Manual                                                                                                                            | 1.0                                              | (0.2-4.5) |                                        |           |                                                                                                         |           |
| <b>Birthweight</b>                                                                                                                |                                                  |           |                                        |           |                                                                                                         |           |
| Lower than normal                                                                                                                 | 1.0                                              |           |                                        |           | -                                                                                                       |           |
| Normal                                                                                                                            | 1.0                                              | (0.5-1.9) | -                                      |           |                                                                                                         |           |
| Higher than normal                                                                                                                | 0.7                                              | (0.3-1.7) |                                        |           |                                                                                                         |           |
| <b>Ever hungry during all the time<br/>during childhood because there<br/>was not enough food</b>                                 |                                                  |           |                                        |           |                                                                                                         |           |
| No                                                                                                                                | 1.0                                              |           | -                                      |           | -                                                                                                       |           |
| Yes                                                                                                                               | 1.0                                              | (0.6-1.7) |                                        |           |                                                                                                         |           |
| <b>Lost weight during childhood</b>                                                                                               |                                                  |           |                                        |           |                                                                                                         |           |
| No                                                                                                                                | 1.0                                              |           | -                                      |           | -                                                                                                       |           |
| Yes                                                                                                                               | 1.1                                              | (0.6-1.9) |                                        |           |                                                                                                         |           |
| <b>Ever smoked regularly (any of<br/>cigarettes, bidi, huqqa)</b>                                                                 |                                                  |           |                                        |           |                                                                                                         |           |
| Never                                                                                                                             | 1.0                                              |           | -                                      |           | -                                                                                                       |           |
| Ever                                                                                                                              | 0.9                                              | (0.4-2.1) |                                        |           |                                                                                                         |           |
| <b>Environmental tobacco smoke (at<br/>least one other household member<br/>smokes cigarettes, bidi or huqqa in<br/>the home)</b> |                                                  |           |                                        |           |                                                                                                         |           |
| No                                                                                                                                | 1.0                                              |           | -                                      |           | -                                                                                                       |           |
| Yes                                                                                                                               | 0.9                                              | (0.5-1.6) |                                        |           |                                                                                                         |           |
| <b>Consumption of meat or eggs</b>                                                                                                |                                                  |           |                                        |           |                                                                                                         |           |



|                                                         |     |           |     |           |               |
|---------------------------------------------------------|-----|-----------|-----|-----------|---------------|
| Do not eat either meat or eggs as much as once per week | 1.0 |           | -   |           |               |
| Eat one of meat or eggs as much as once per week        | 1.2 | (0.6-2.3) |     |           |               |
| Eat both meat and eggs at least once per week           | 1.8 | (0.9-3.5) |     |           |               |
| <b>Current nutrition<sup>d</sup></b>                    |     |           |     |           |               |
| Neither BMI nor WHR high                                | 1.0 |           | 1.0 | 1.0       |               |
| One of BMI or WHR high                                  | 1.3 | (0.6-2.5) | 1.2 | (0.6-2.5) | 1.6 (0.7-3.4) |
| Both BMI and WHR high                                   | 2.0 | (1.0-4.0) | 1.9 | (0.9-3.7) | 1.7 (0.8-3.6) |
| <b>Non-user of biomass</b>                              | 1.0 |           | 1.0 |           | -             |
| <b>Use of biomass</b>                                   | 1.4 | (0.8-2.4) | 1.2 | (0.7-2.2) |               |
| <b>Long-term non-user of biomass</b>                    | 1.0 |           |     |           | 1.0           |
| <b>Long-term user of biomass</b>                        | 1.5 | (0.8-2.7) |     |           | 1.3 (0.7-2.4) |

<sup>a</sup>Mutually adjusted risk estimates derived from a single regression model that included use of biomass and all of the variables that were significant ( $p < 0.1$ ) in analyses adjusted only for age

<sup>b</sup>Mutually adjusted risk estimates derived from a single regression model that included use of biomass and all of the variables that were significant ( $p < 0.1$ ) in analyses adjusted only for age, but was restricted to women who were long-term users or non-users of biomass

<sup>a</sup>Body mass index (BMI) ( $\text{kg}/\text{m}^2$ )  $\geq 25$  = high; Waist-to-hip ratio (WHR)  $\geq 0.85$  = high.

**Supplementary Table 7.** Associations of definite or probable CHD on ECG with risk factors.

| Risk factor                                                                                                           | Adjusted only for age<br>(n=841) |           | Fully adjusted <sup>a</sup><br>(n=841) |           | Fully adjusted and limited to long-term users and non-users of biomass <sup>b</sup><br>(n=686) |           |
|-----------------------------------------------------------------------------------------------------------------------|----------------------------------|-----------|----------------------------------------|-----------|------------------------------------------------------------------------------------------------|-----------|
|                                                                                                                       | OR                               | (95% CI)  | OR                                     | (95% CI)  | OR                                                                                             | (95% CI)  |
| <b>Age (per 10 year increase)</b>                                                                                     | 1.1                              | (0.9-1.3) | 1.1                                    | (0.9-1.3) | 1.0                                                                                            | (0.8-1.3) |
| <b>Educational status</b>                                                                                             |                                  |           |                                        |           |                                                                                                |           |
| Illiterate                                                                                                            | 1.0                              |           | -                                      |           | -                                                                                              |           |
| Any literacy                                                                                                          | 0.8                              | (0.4-1.7) |                                        |           |                                                                                                |           |
| <b>Household income/month</b>                                                                                         |                                  |           |                                        |           |                                                                                                |           |
| <3000-10000PKR                                                                                                        | 1.0                              |           | 1.0                                    |           | 1.0                                                                                            |           |
| >10000PKR                                                                                                             | 1.6                              | (1.1-2.3) | 1.6                                    | (1.1-2.4) | 1.3                                                                                            | (0.8-2.0) |
| <b>Household ownership</b>                                                                                            |                                  |           |                                        |           |                                                                                                |           |
| Rented                                                                                                                | 1.0                              |           | -                                      |           | -                                                                                              |           |
| Own                                                                                                                   | 1.4                              | (0.7-2.9) |                                        |           |                                                                                                |           |
| <b>Construction of house</b>                                                                                          |                                  |           |                                        |           |                                                                                                |           |
| Katcha/semi-pucca                                                                                                     | 1.0                              |           | -                                      |           | -                                                                                              |           |
| Pucca                                                                                                                 | 1.0                              | (0.7-1.5) |                                        |           |                                                                                                |           |
| <b>Number of household assets</b>                                                                                     |                                  |           |                                        |           |                                                                                                |           |
| 0-1                                                                                                                   | 1.0                              |           | -                                      |           | -                                                                                              |           |
| 2-3                                                                                                                   | 1.0                              | (0.7-1.5) |                                        |           |                                                                                                |           |
| ≥4                                                                                                                    | 1.3                              | (0.8-2.1) |                                        |           |                                                                                                |           |
| <b>Father's occupation in woman's childhood</b>                                                                       |                                  |           |                                        |           |                                                                                                |           |
| Non-manual                                                                                                            | 1.0                              |           | -                                      |           | -                                                                                              |           |
| Manual                                                                                                                | 1.0                              | (0.4-2.3) |                                        |           |                                                                                                |           |
| <b>Birthweight</b>                                                                                                    |                                  |           |                                        |           |                                                                                                |           |
| Lower than normal                                                                                                     | 1.0                              |           |                                        |           | -                                                                                              |           |
| Normal                                                                                                                | 1.1                              | (0.7-1.7) | -                                      |           |                                                                                                |           |
| Higher than normal                                                                                                    | 1.1                              | (0.7-1.9) |                                        |           |                                                                                                |           |
| <b>Ever hungry during all the time during childhood because there was not enough food</b>                             |                                  |           |                                        |           |                                                                                                |           |
| No                                                                                                                    | 1.0                              |           | -                                      |           | -                                                                                              |           |
| Yes                                                                                                                   | 1.1                              | (0.8-1.6) |                                        |           |                                                                                                |           |
| <b>Lost weight during childhood</b>                                                                                   |                                  |           |                                        |           |                                                                                                |           |
| No                                                                                                                    | 1.0                              |           | -                                      |           | -                                                                                              |           |
| Yes                                                                                                                   | 0.8                              | (0.6-1.2) |                                        |           |                                                                                                |           |
| <b>Ever smoked regularly (any of cigarettes, bidi, huqqa)</b>                                                         |                                  |           |                                        |           |                                                                                                |           |
| Never                                                                                                                 | 1.0                              |           | -                                      |           | -                                                                                              |           |
| Ever                                                                                                                  | 1.0                              | (0.6-1.8) |                                        |           |                                                                                                |           |
| <b>Environmental tobacco smoke (at least one other household member smokes cigarettes, bidi or huqqa in the home)</b> |                                  |           |                                        |           |                                                                                                |           |
| No                                                                                                                    | 1.0                              |           |                                        |           | -                                                                                              |           |
| Yes                                                                                                                   | 0.9                              | (0.6-1.3) | -                                      |           |                                                                                                |           |
| <b>Consumption of meat or eggs</b>                                                                                    |                                  |           |                                        |           |                                                                                                |           |

|                                                         |     |           |     |               |
|---------------------------------------------------------|-----|-----------|-----|---------------|
| Do not eat either meat or eggs as much as once per week | 1.0 |           |     |               |
| Eat one of meat or eggs as much as once per week        | 0.9 | (0.6-1.4) |     |               |
| Eat both meat and eggs at least once per week           | 1.2 | (0.7-1.8) |     |               |
| <b>Current nutrition<sup>c</sup></b>                    |     |           |     |               |
| Neither BMI nor WHR high                                | 1.0 |           |     |               |
| One of BMI or WHR high                                  | 0.8 | (0.5-1.2) | -   |               |
| Both BMI and WHR high                                   | 1.1 | (0.7-1.6) |     |               |
| <b>Non-user of biomass user</b>                         | 1.0 |           | 1.0 |               |
| <b>User of biomass</b>                                  | 0.8 | (0.6-1.2) | 0.8 | (0.6-1.2)     |
| <b>Longterm non-user of biomass</b>                     | 1.0 |           |     | 1.0           |
| <b>Longterm user of biomass</b>                         | 0.9 | (0.6-1.3) |     | 0.9 (0.6-1.3) |

<sup>a</sup>ECGs were missing for 9 women or not codable due to poor quality.

<sup>b</sup>Mutually adjusted risk estimates derived from a single regression model that included use of biomass and all of the variables that were significant ( $p < 0.1$ ) in analyses adjusted only for age

<sup>c</sup>Mutually adjusted risk estimates derived from a single regression model that included use of biomass and all of the variables that were significant ( $p < 0.1$ ) in analyses adjusted only for age, but was restricted to women who were long-term users or non-users of biomass

<sup>d</sup>Body mass index (BMI) ( $\text{kg}/\text{m}^2$ )  $\geq 25 = \text{high}$ ; Waist-to-hip ratio (WHR)  $\geq 0.85 = \text{high}$ .
